# Supplementary material for: Global, regional, and national burden and quality of care index in children and adolescents: A systematic analysis for the global burden of disease study 1990–2017
Source: PubMed Central journal article supplement (PMC9041858; doi:10.1371/journal.pone.0267596), 2022-04-26
Supplement: pone.0267596.s002.pdf [file pone.0267596.s002.pdf]

Early Neonatal, Both

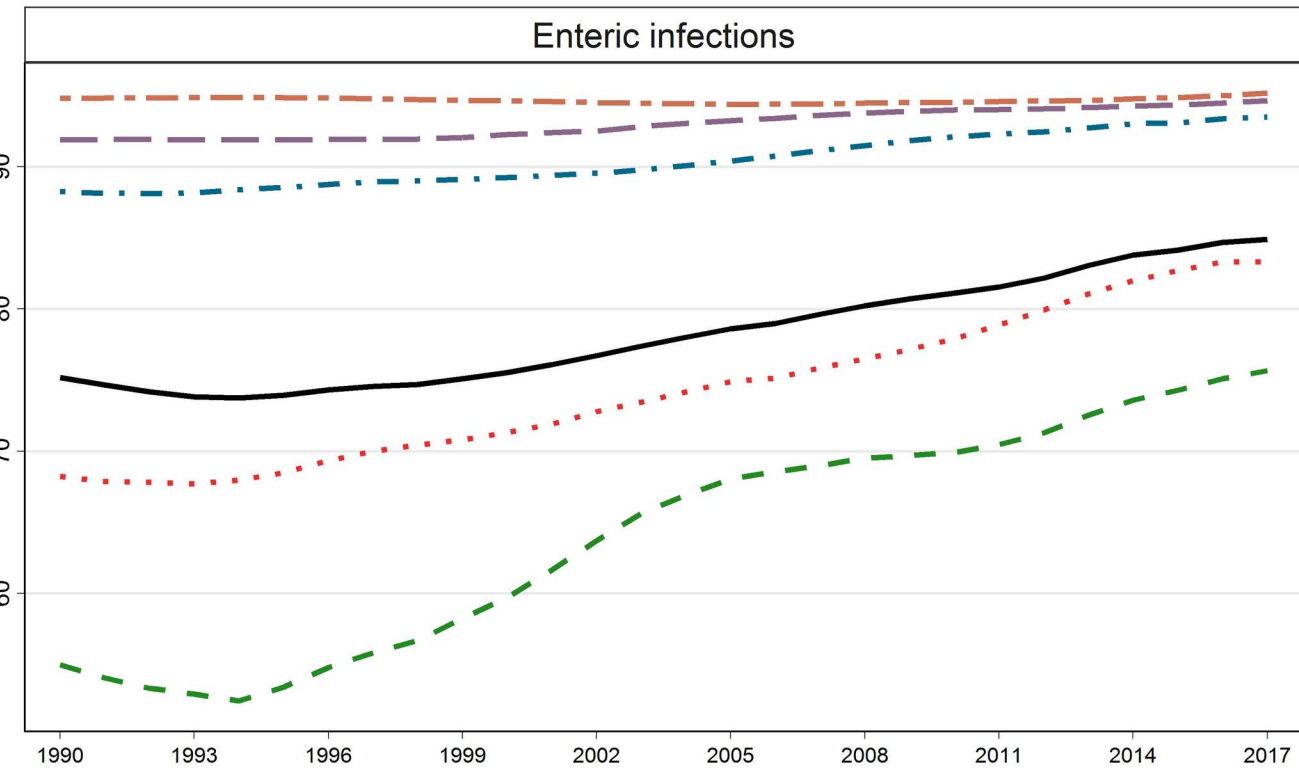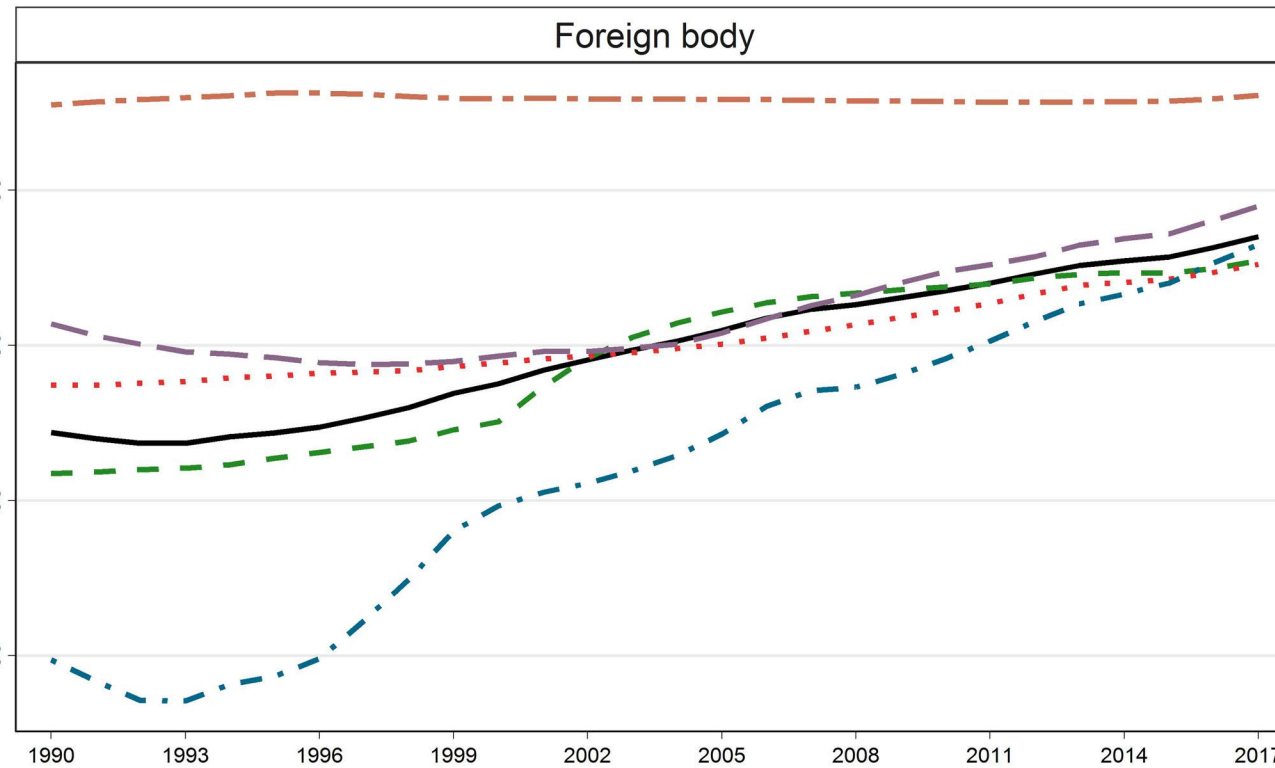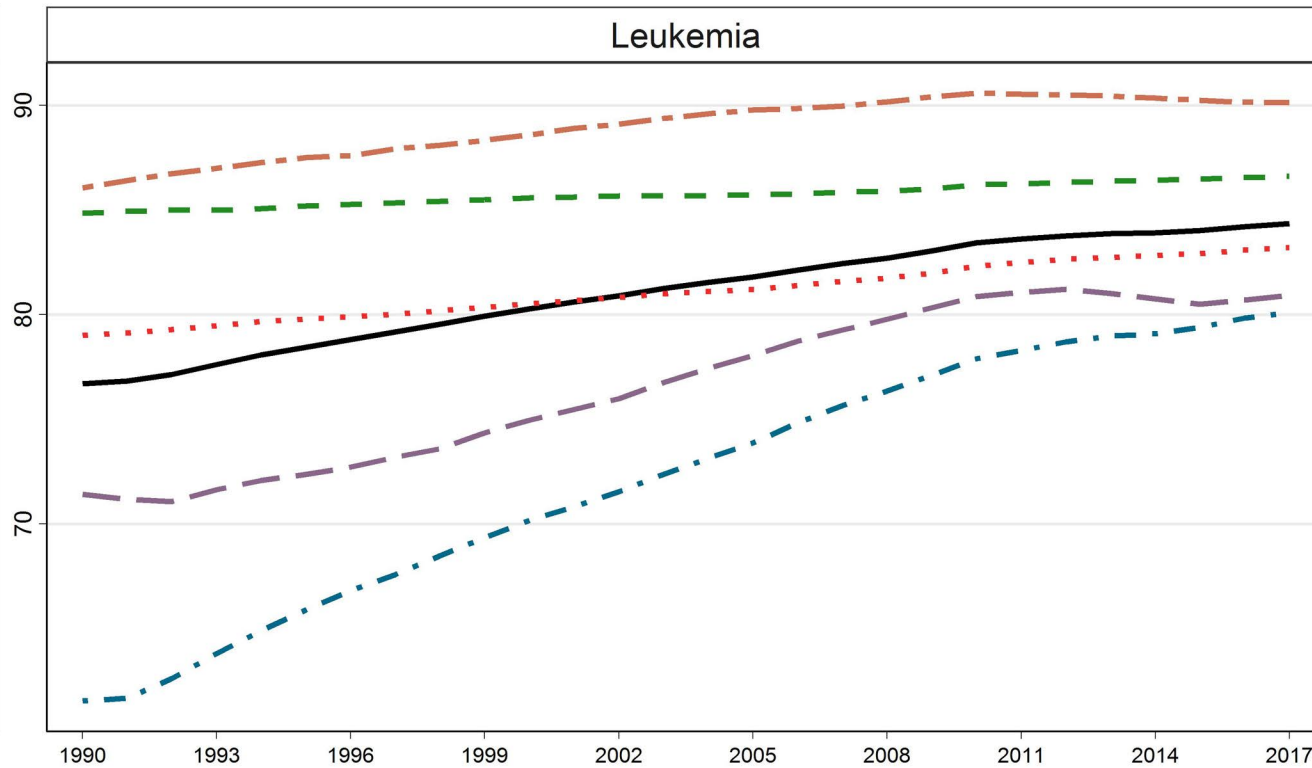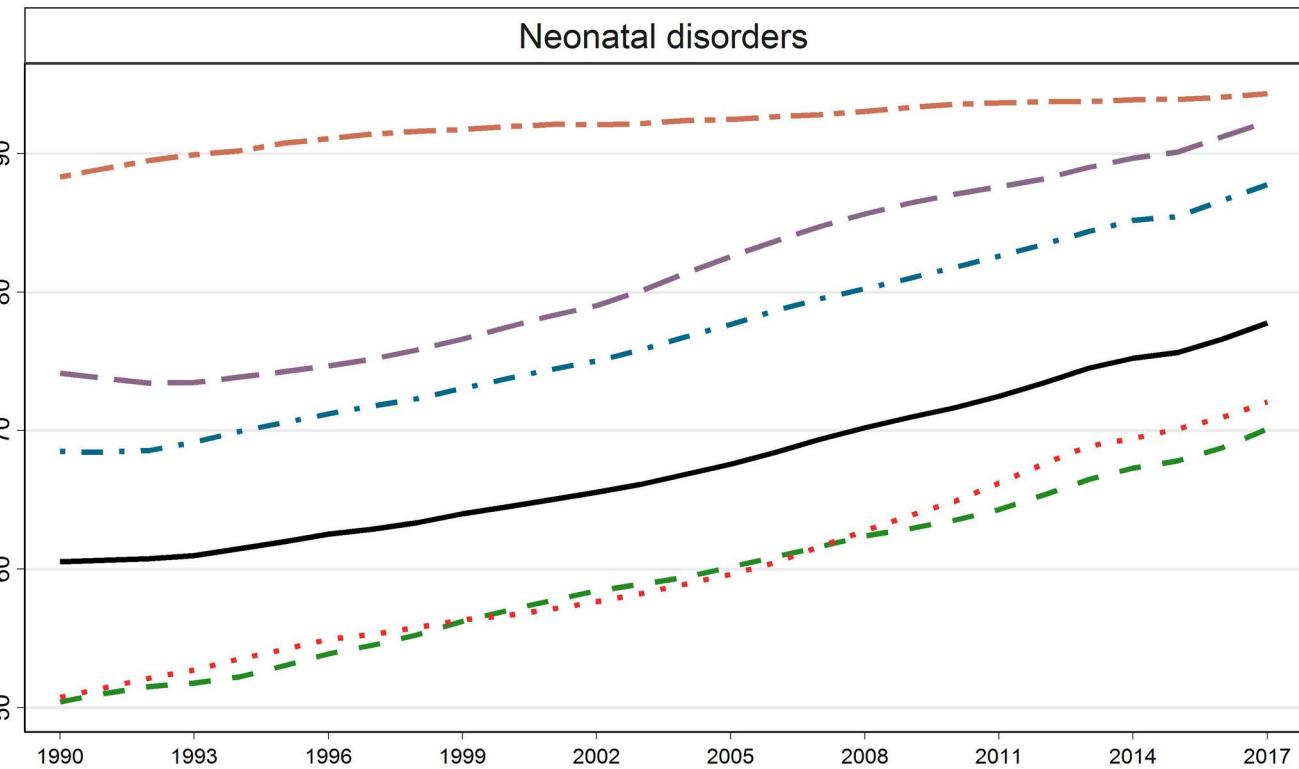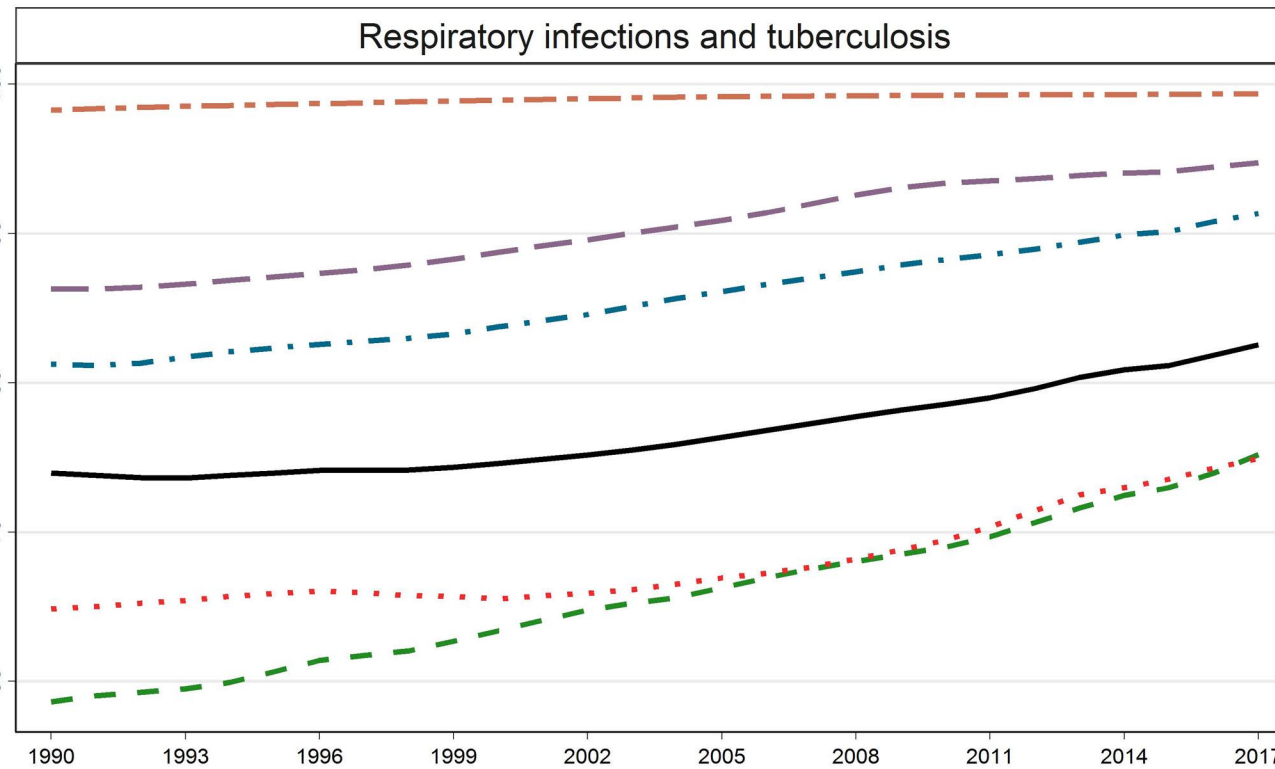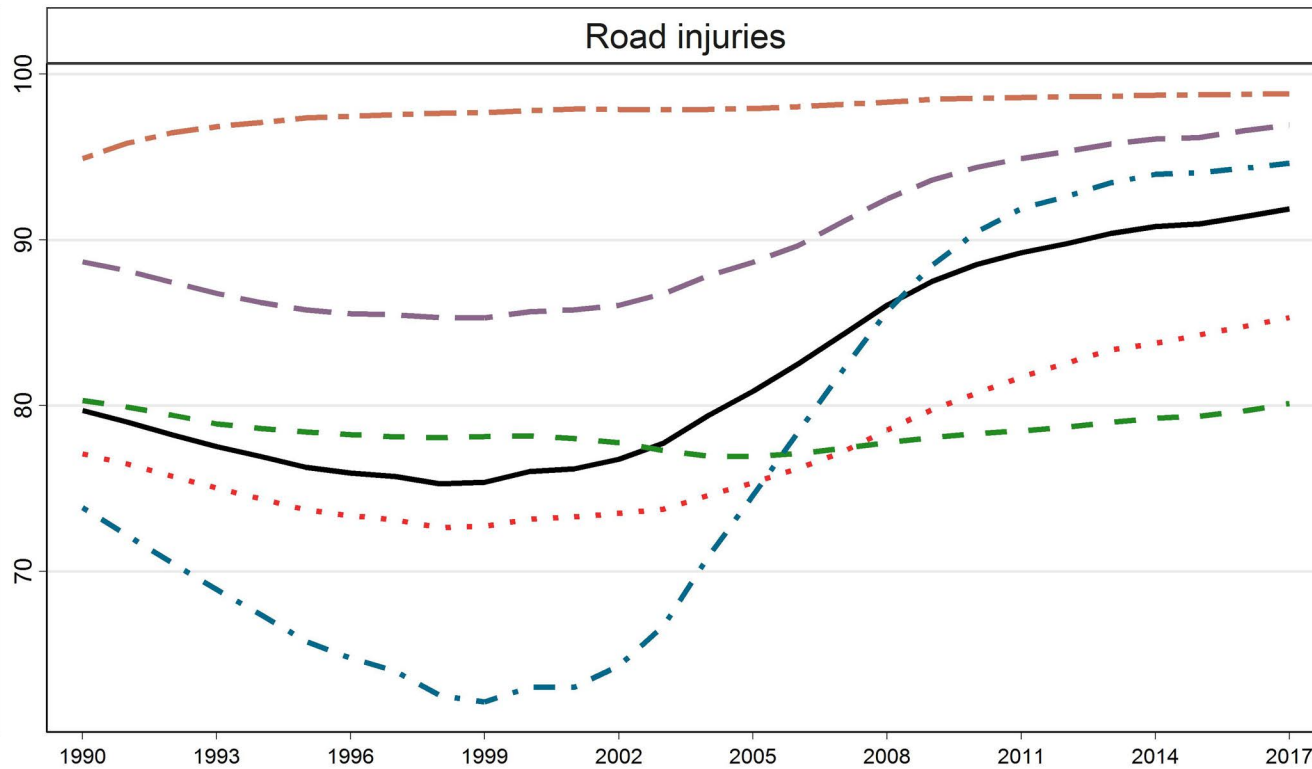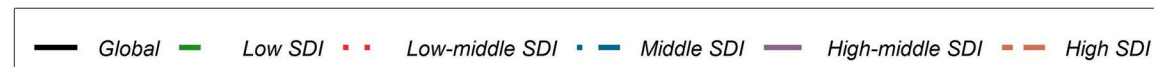

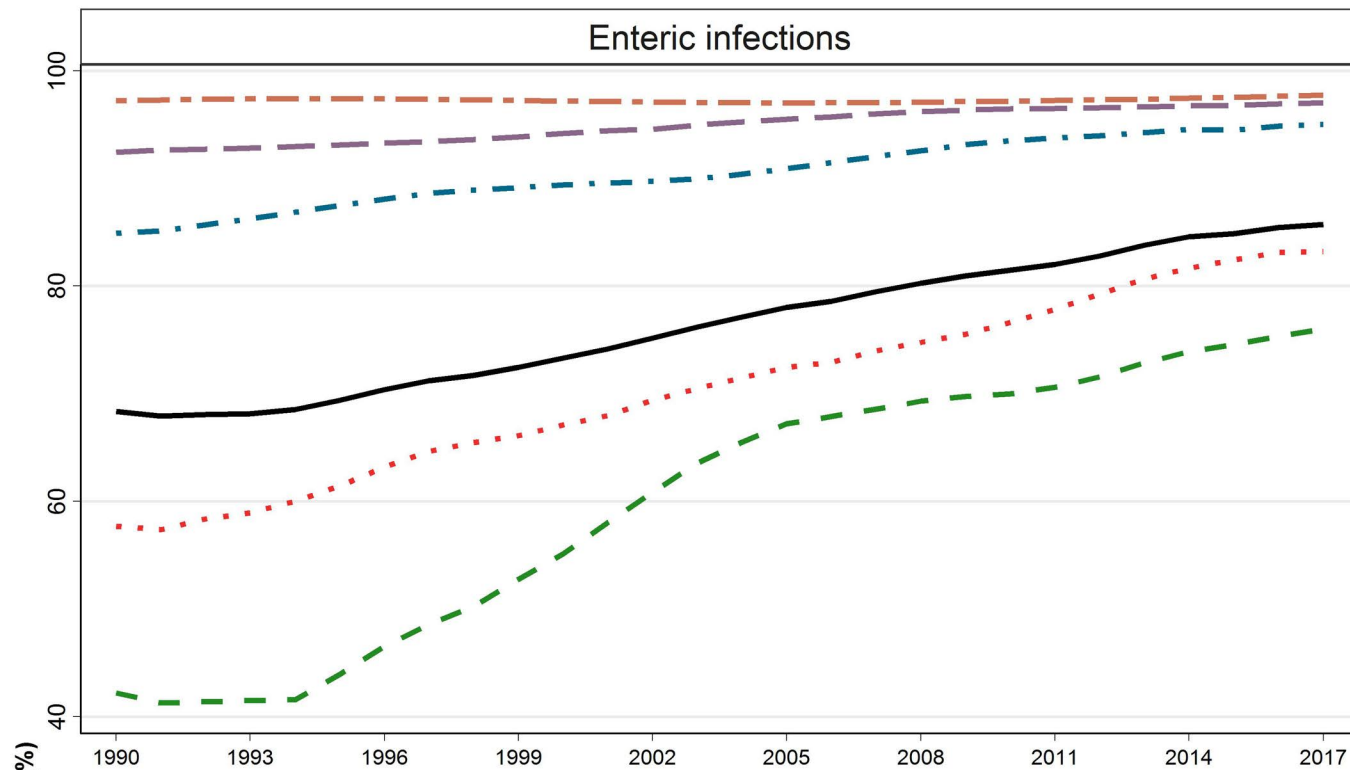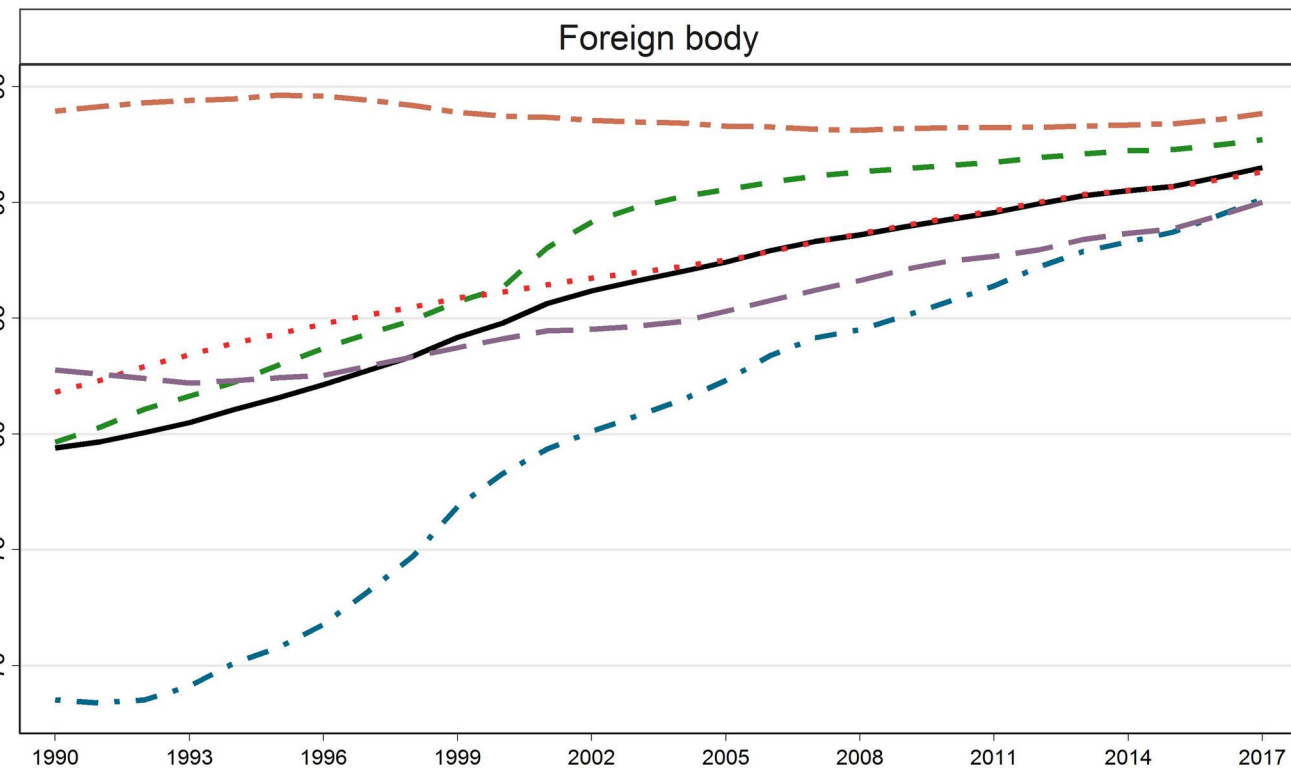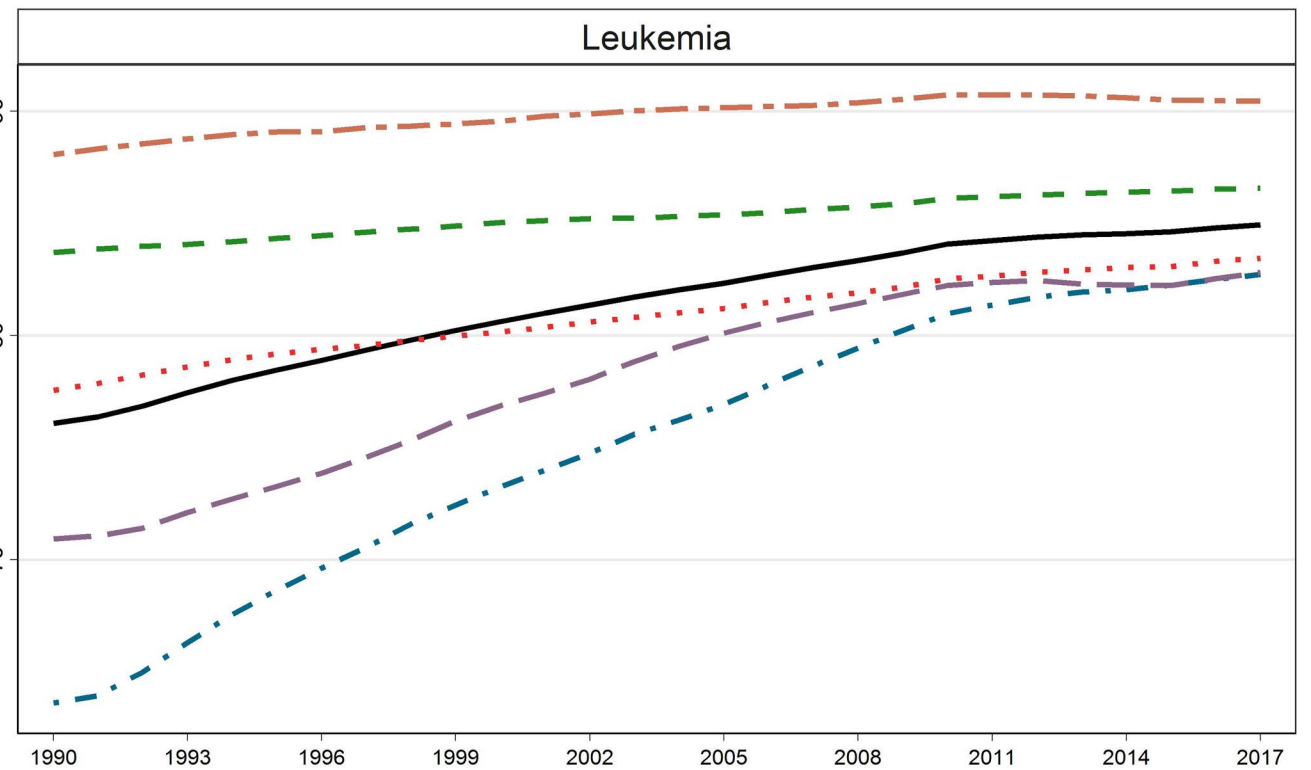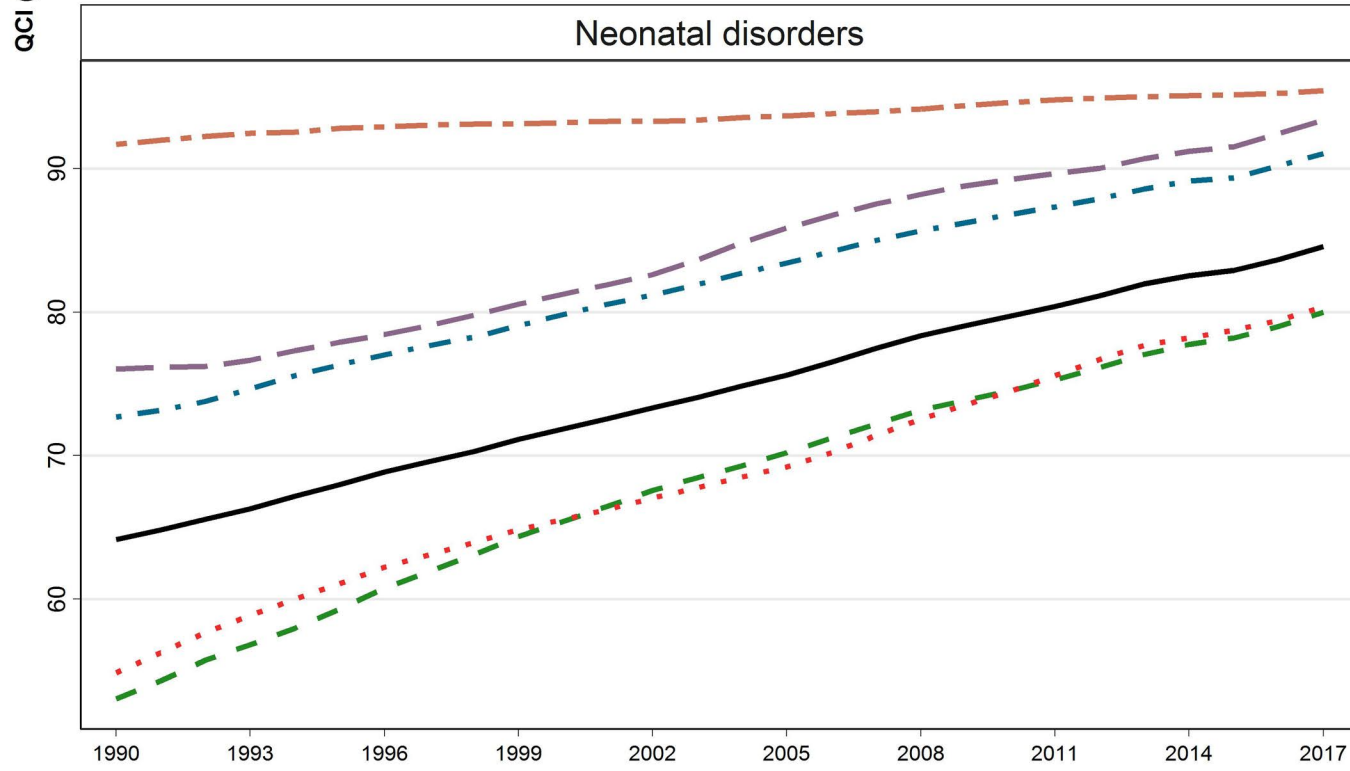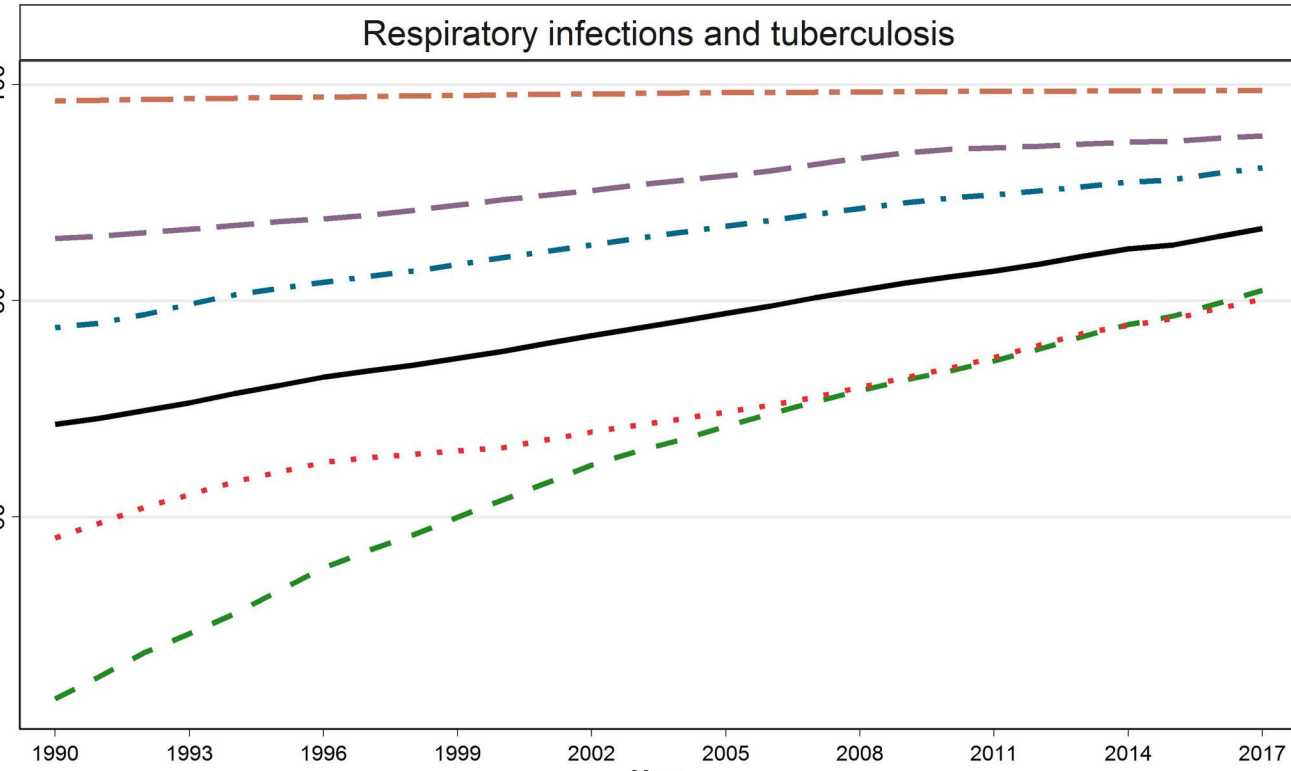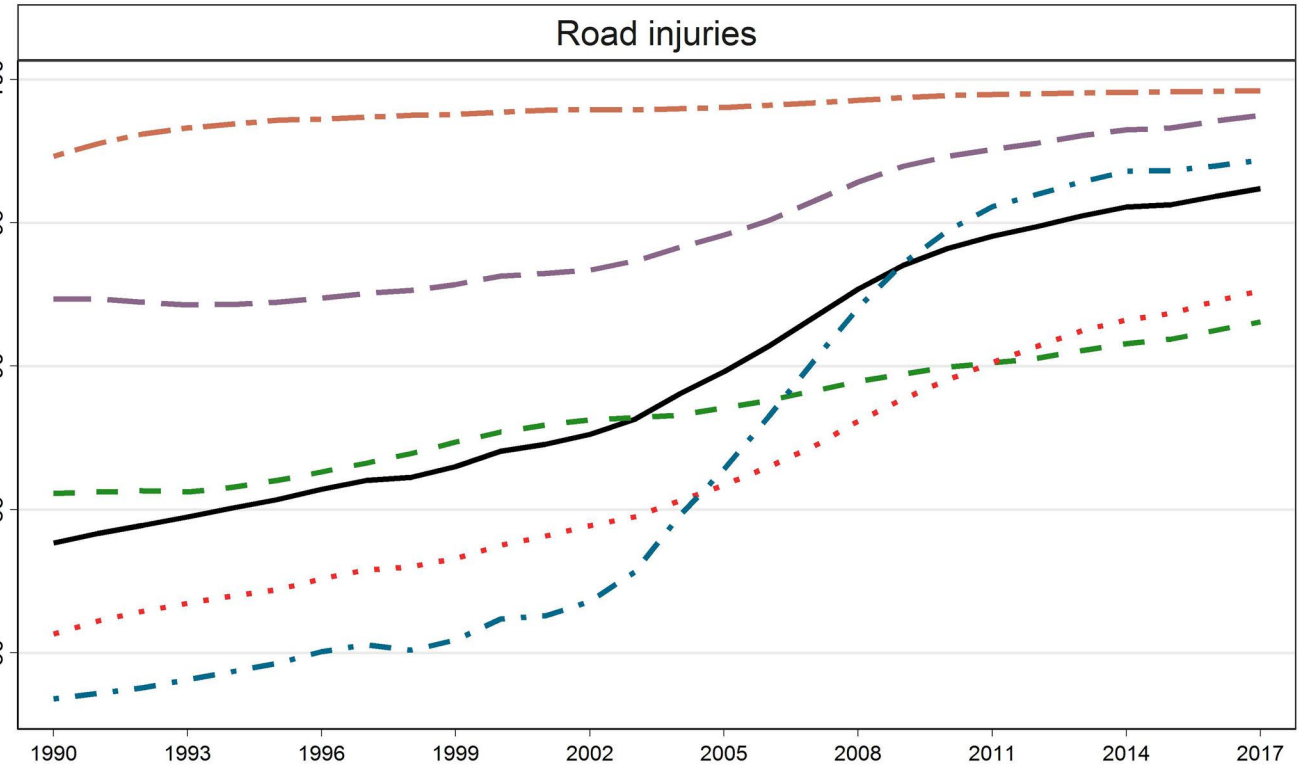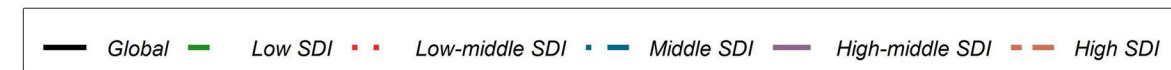



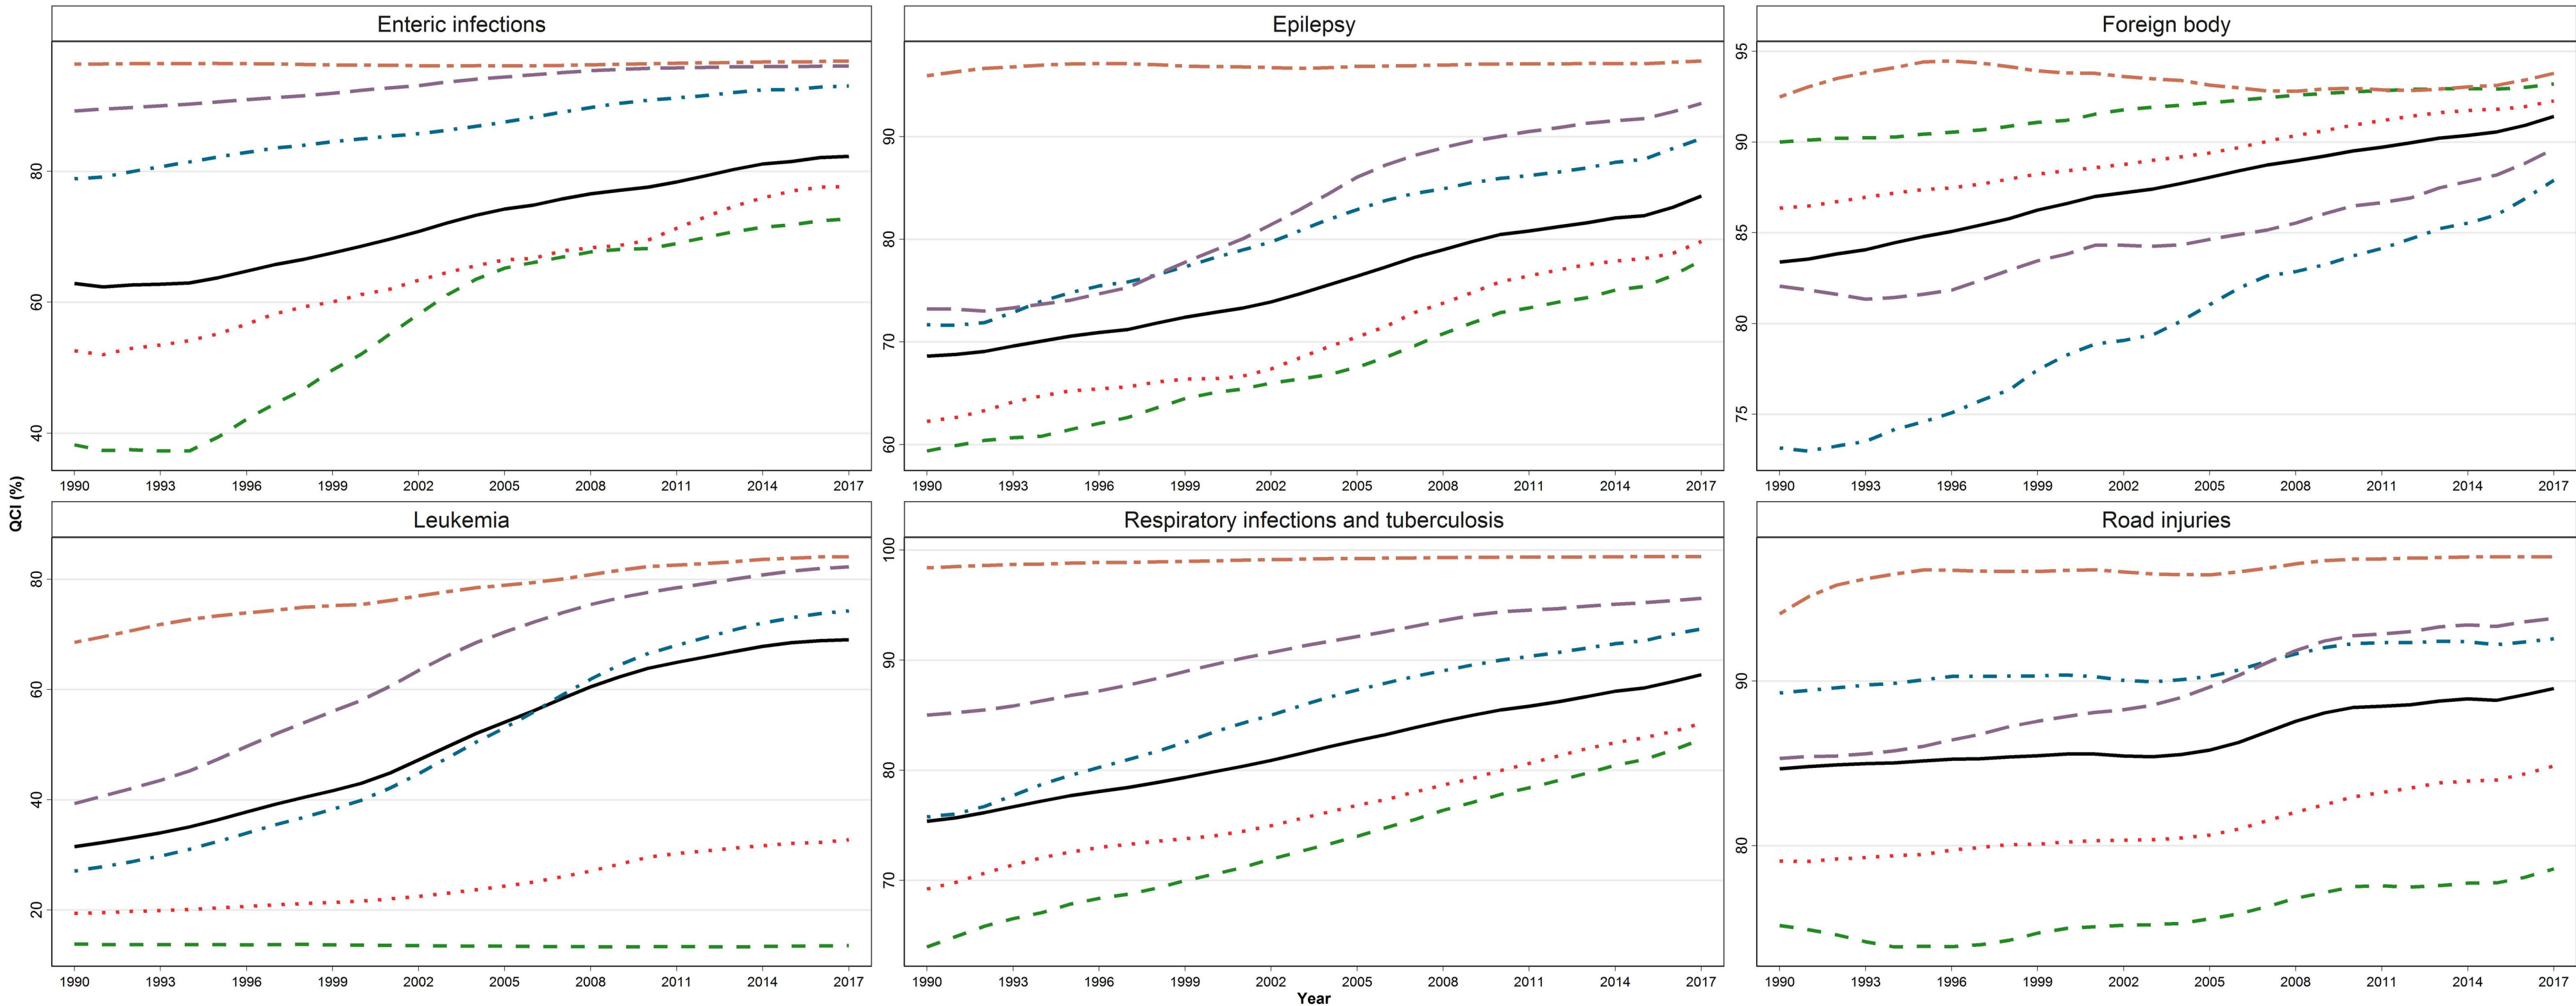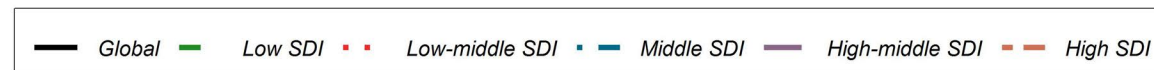

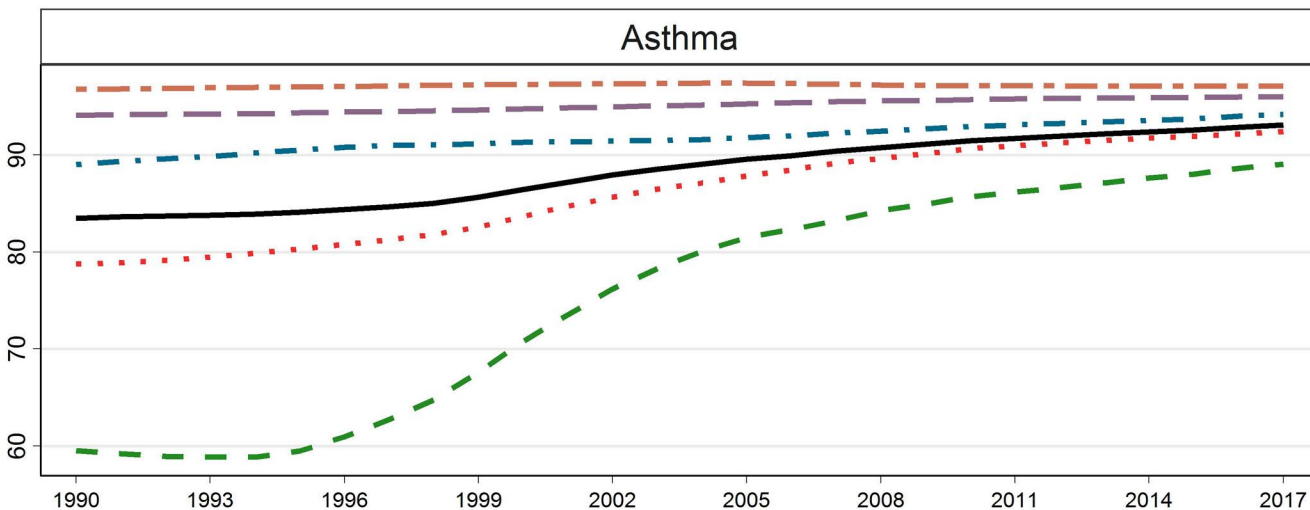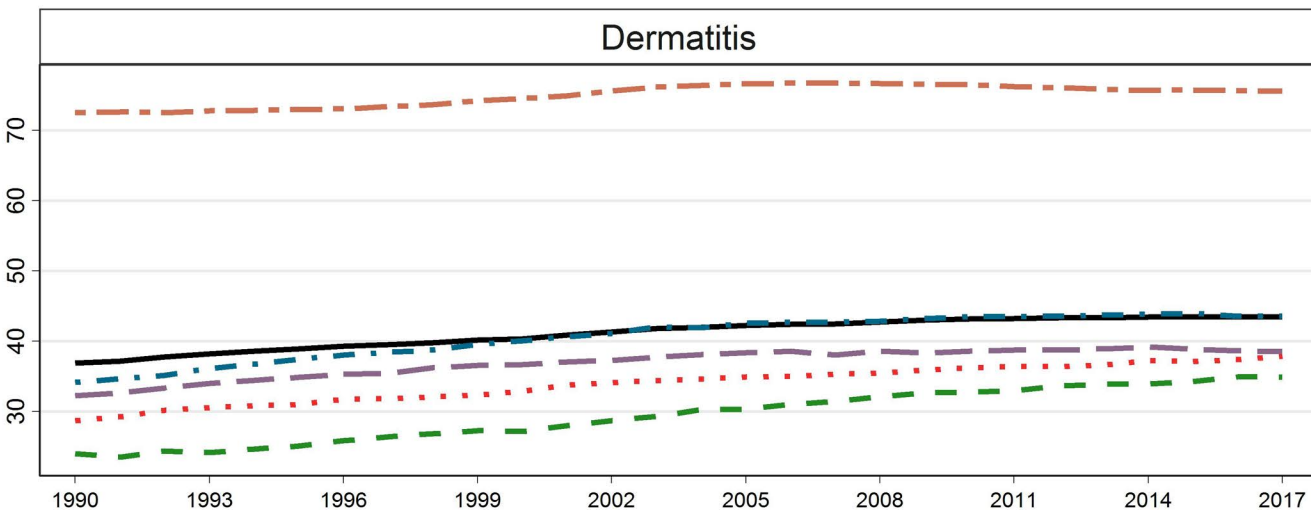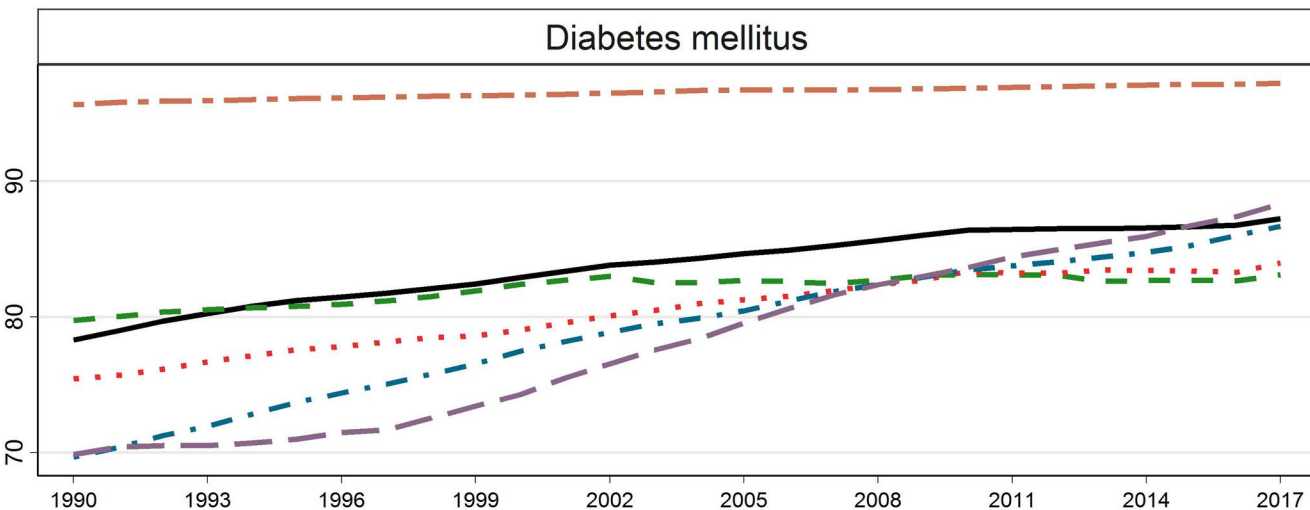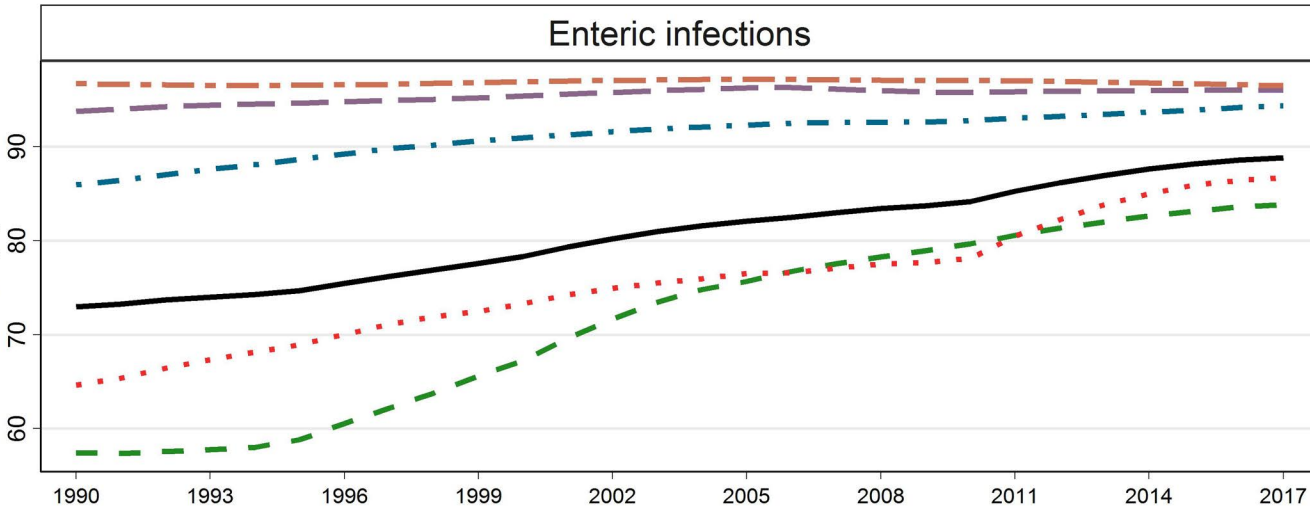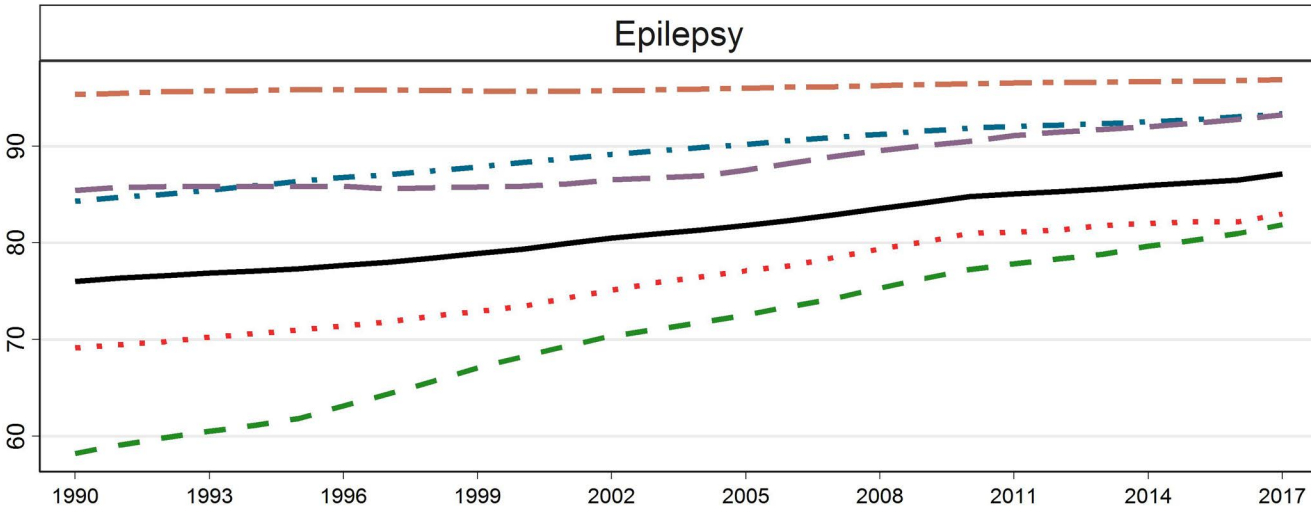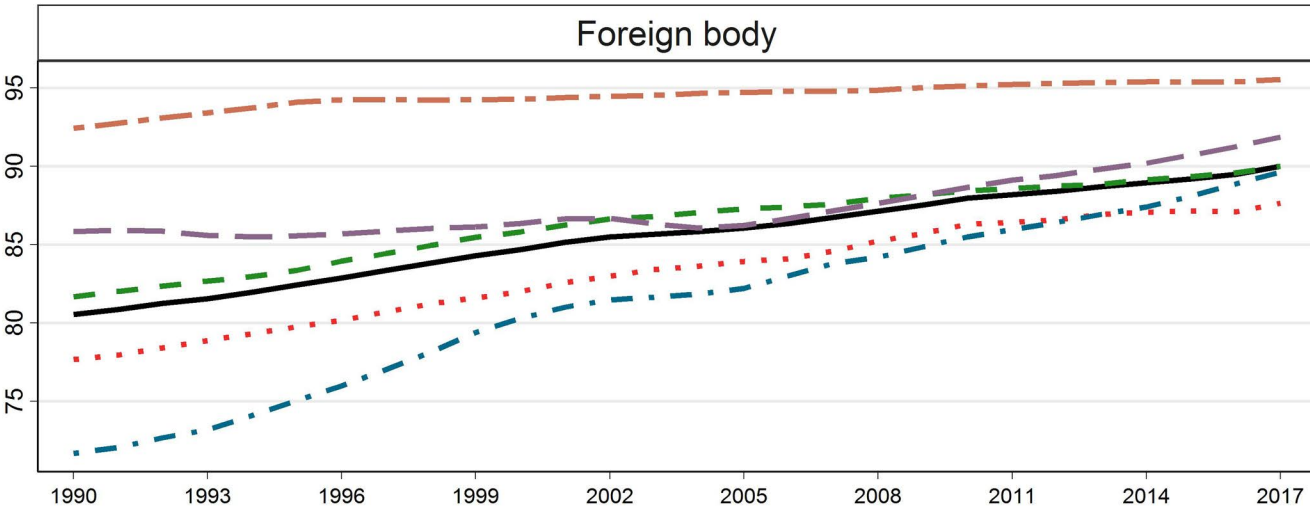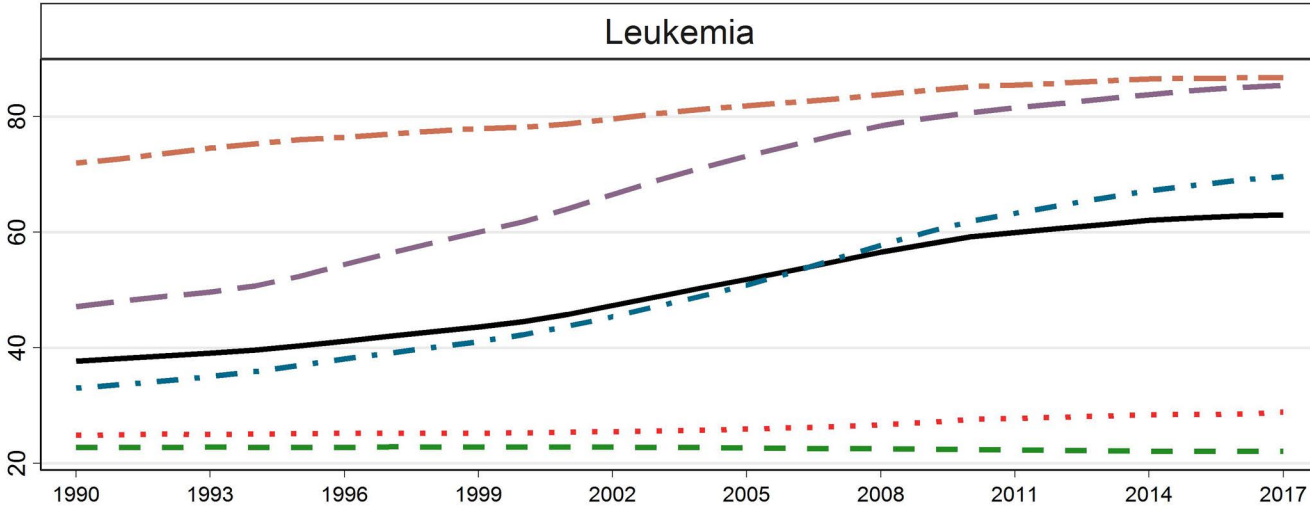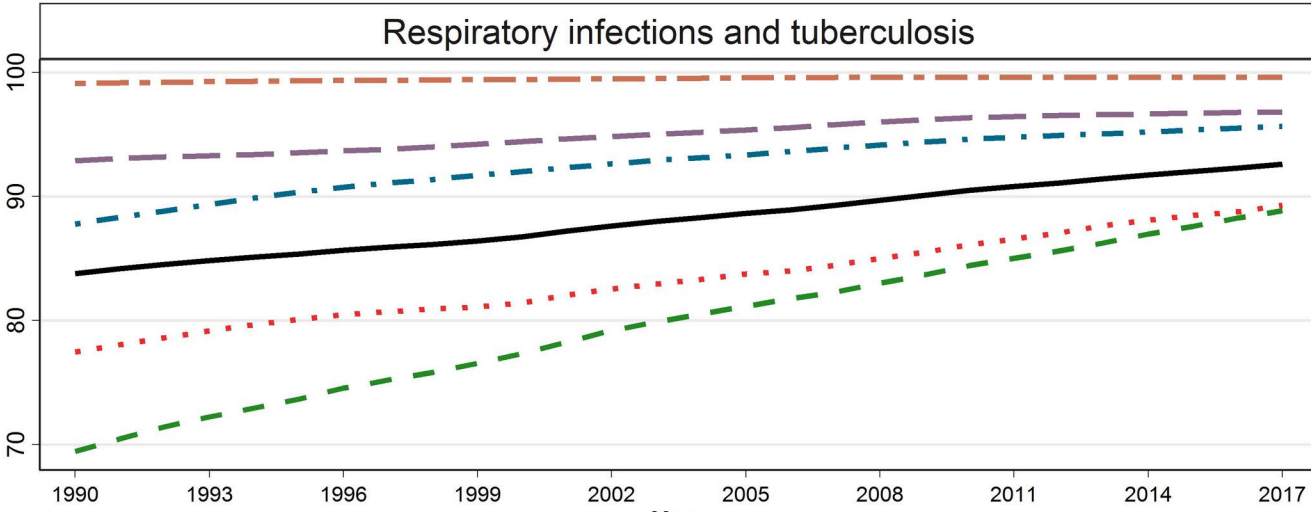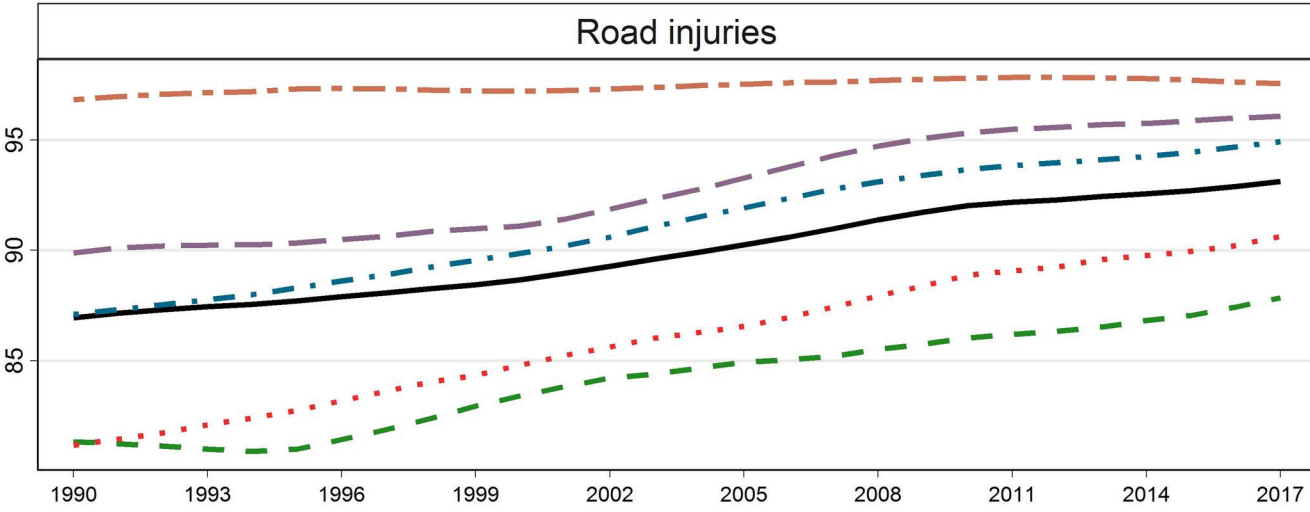



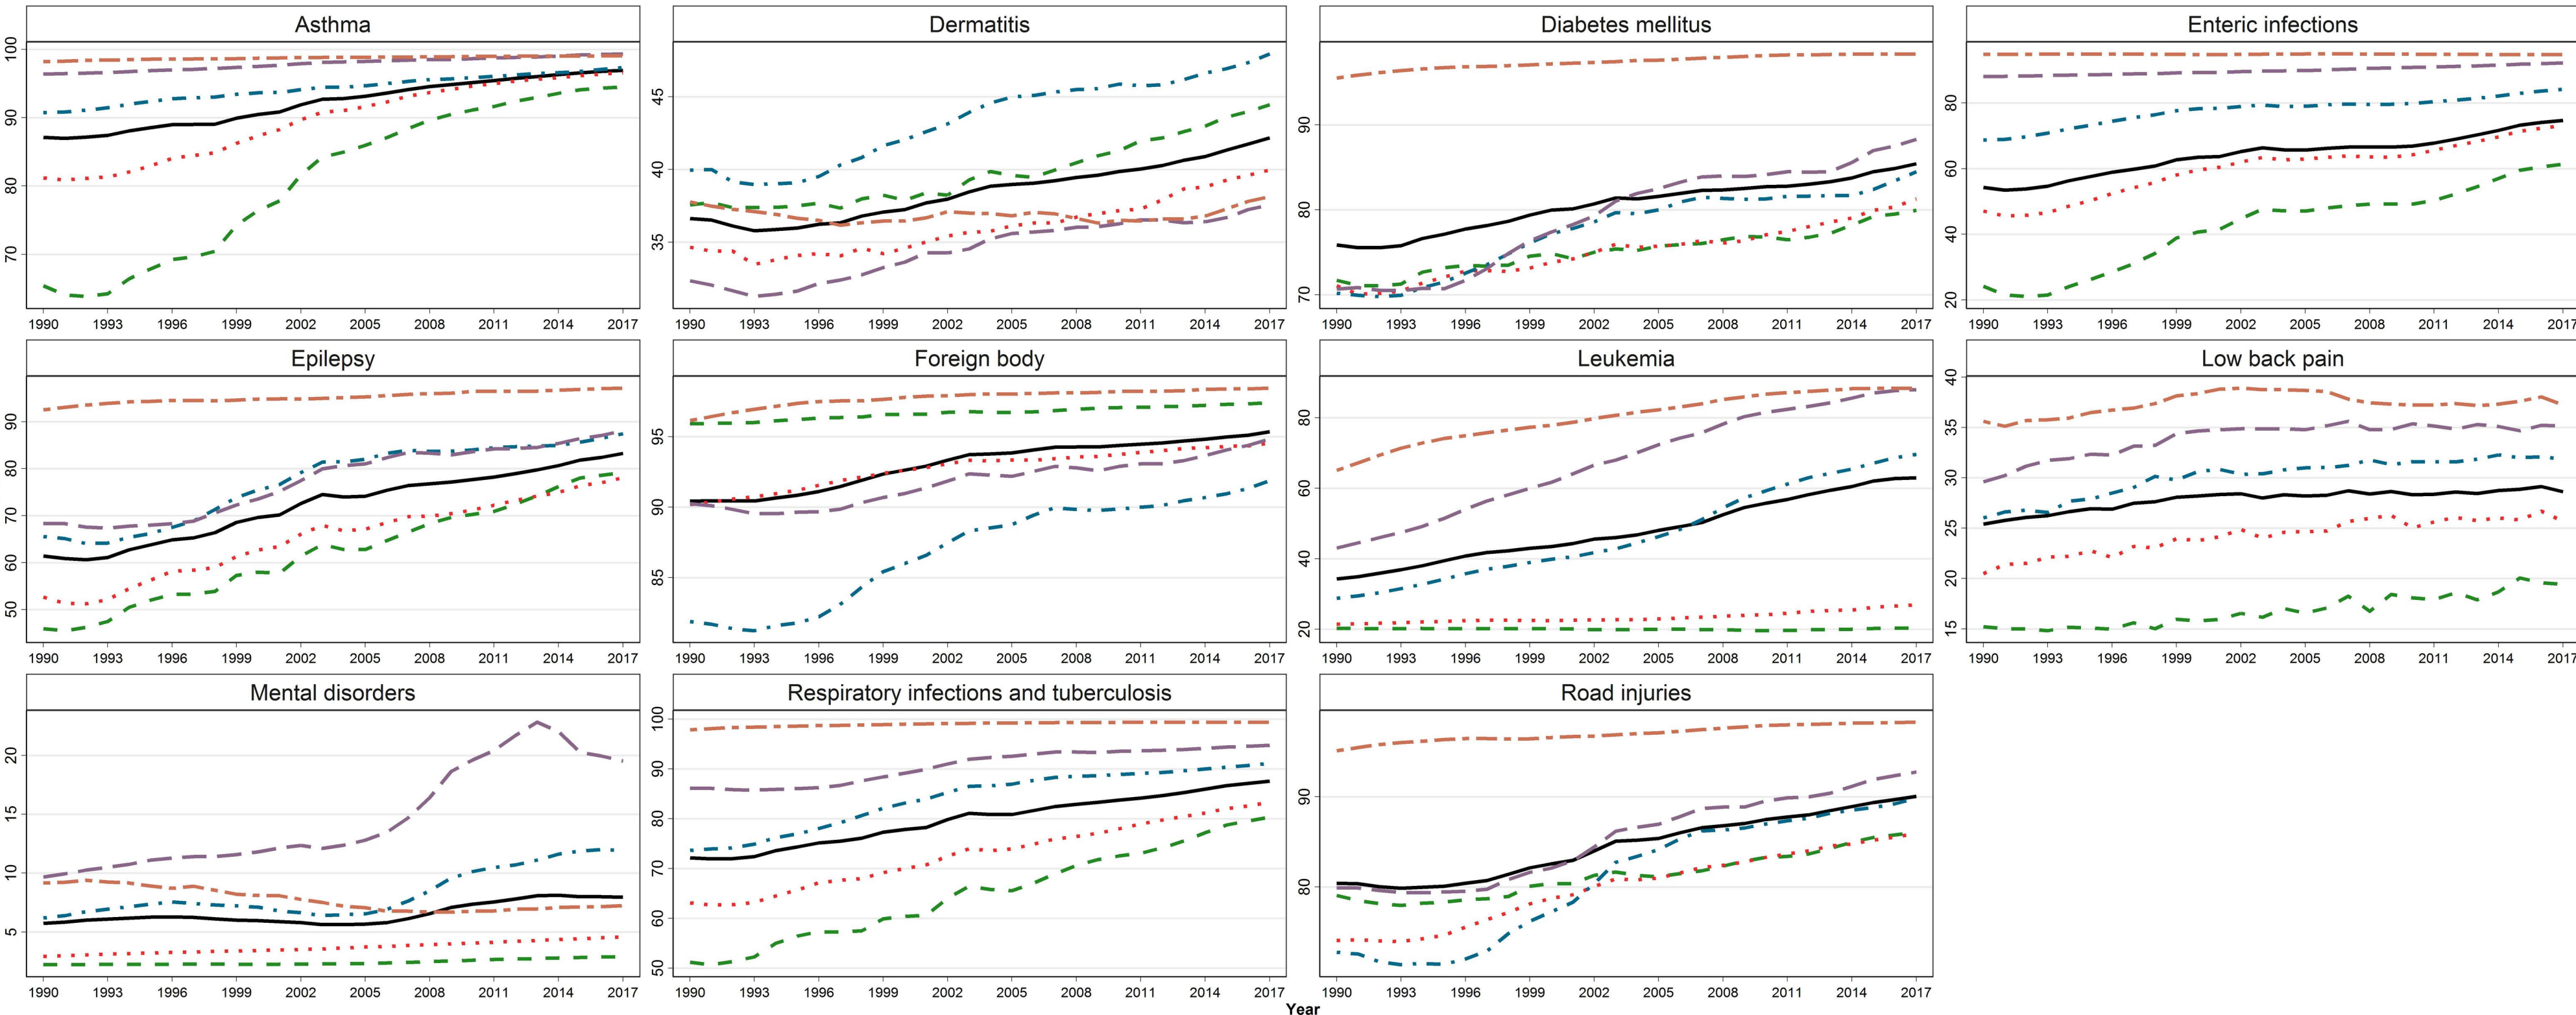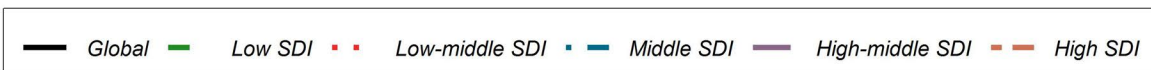

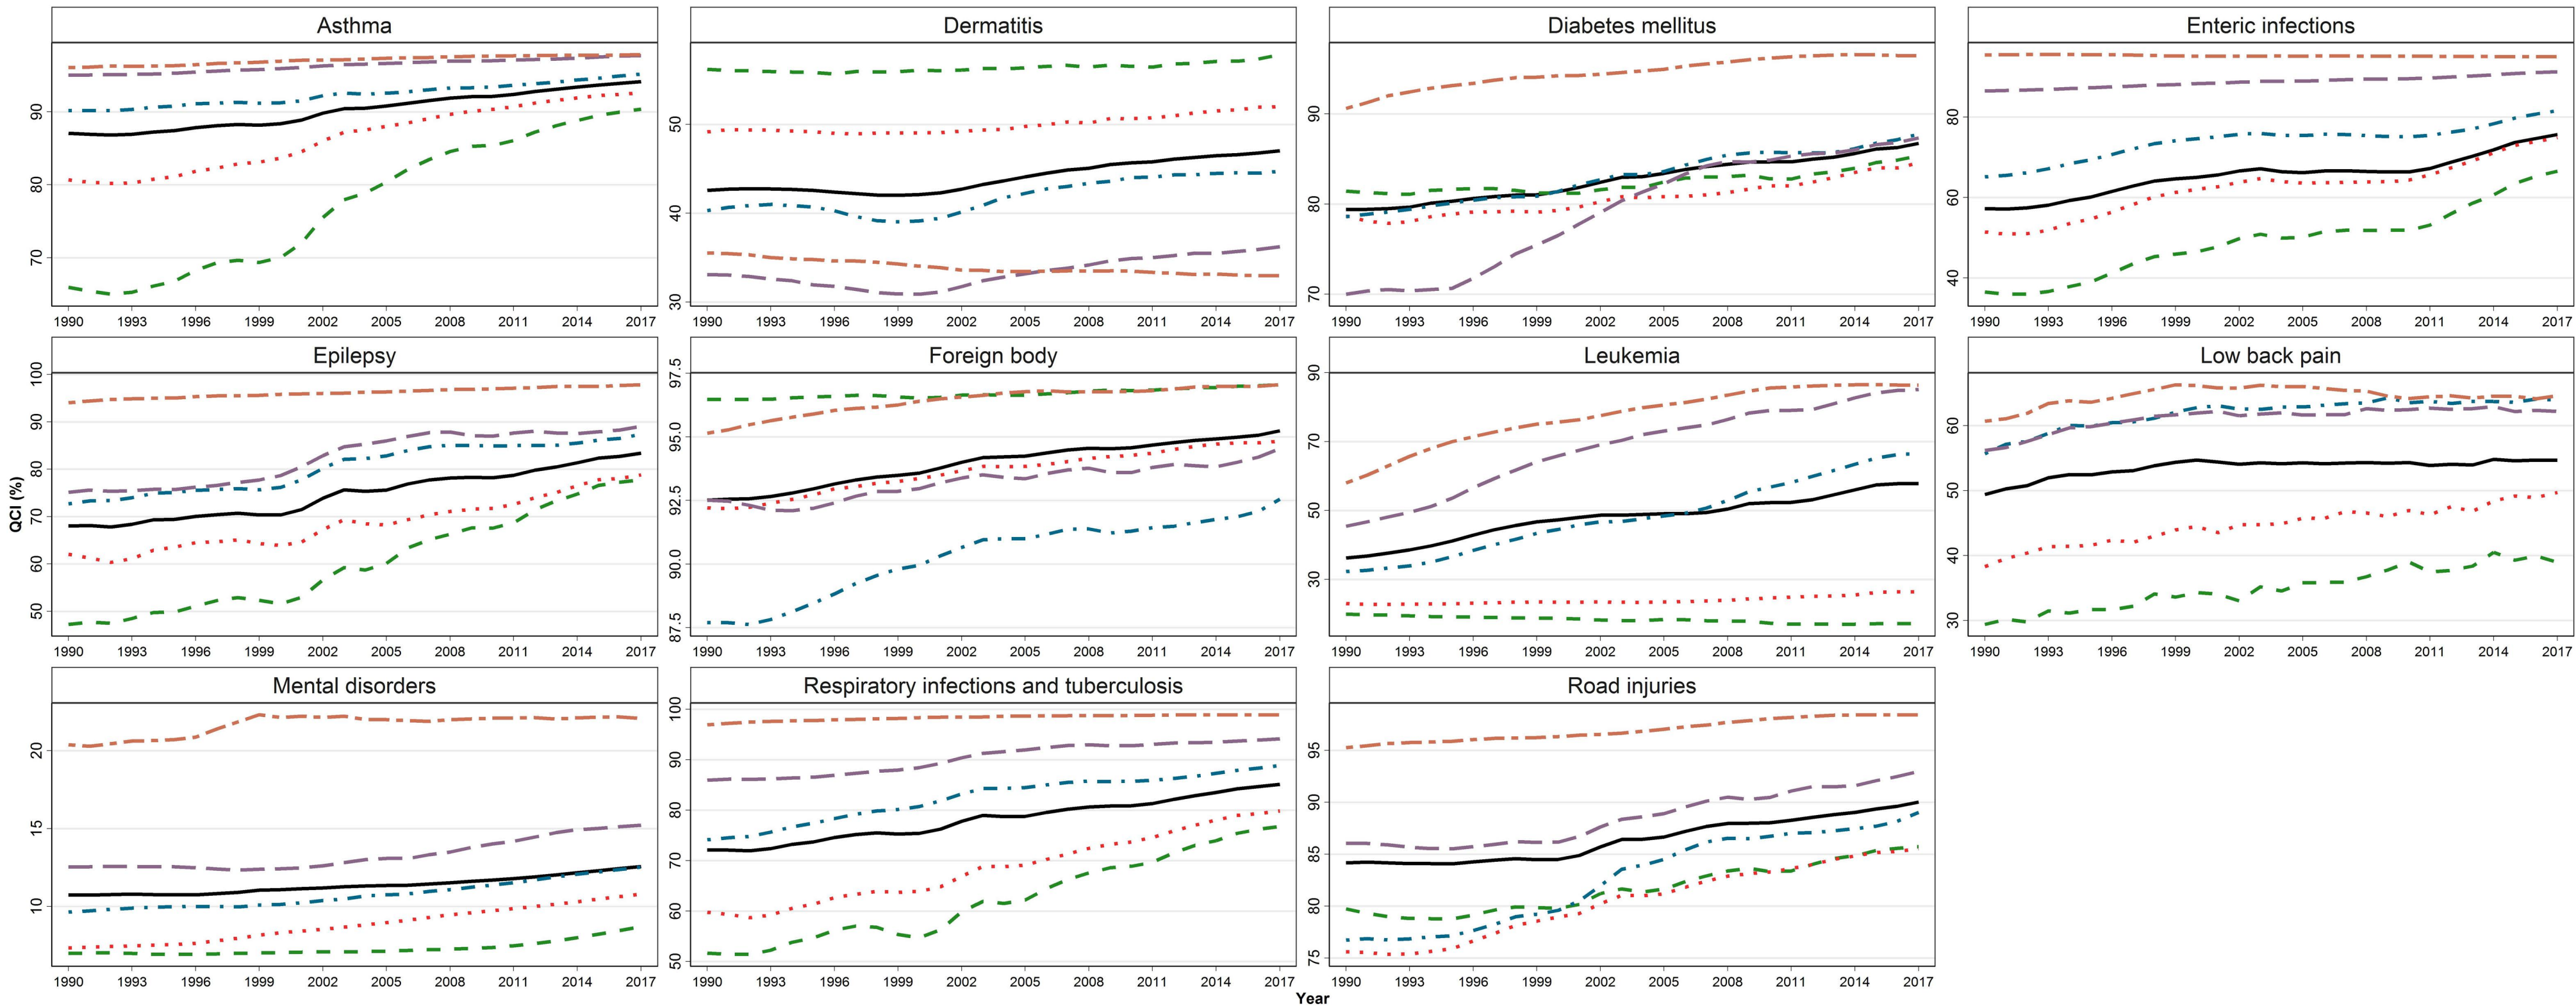

— Global — Low SDI ··· Low-middle SDI -·- Middle SDI - - High-middle SDI - - High SDI



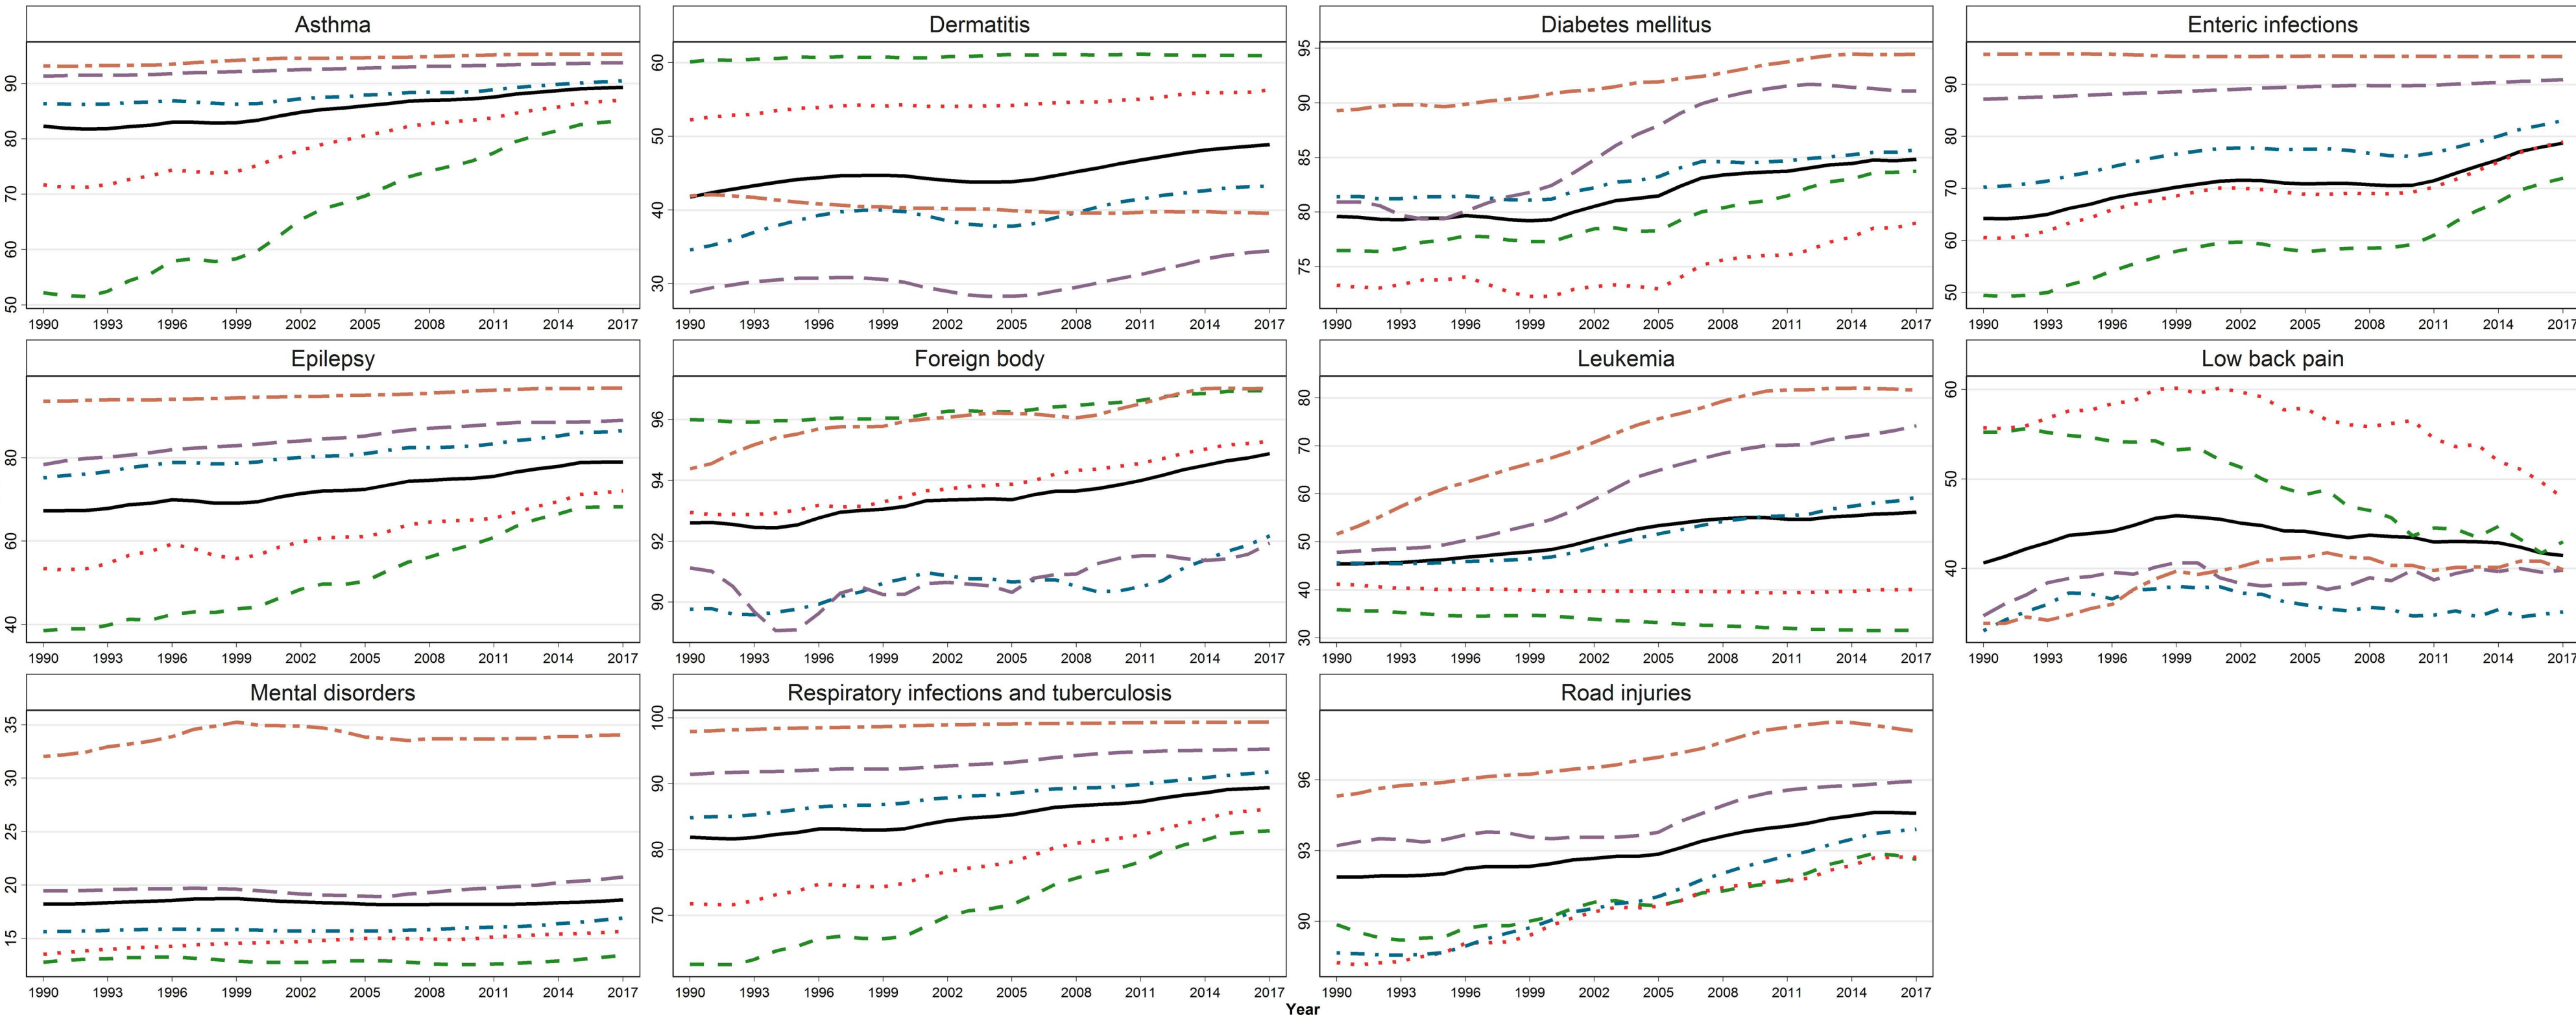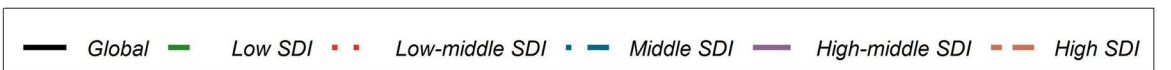

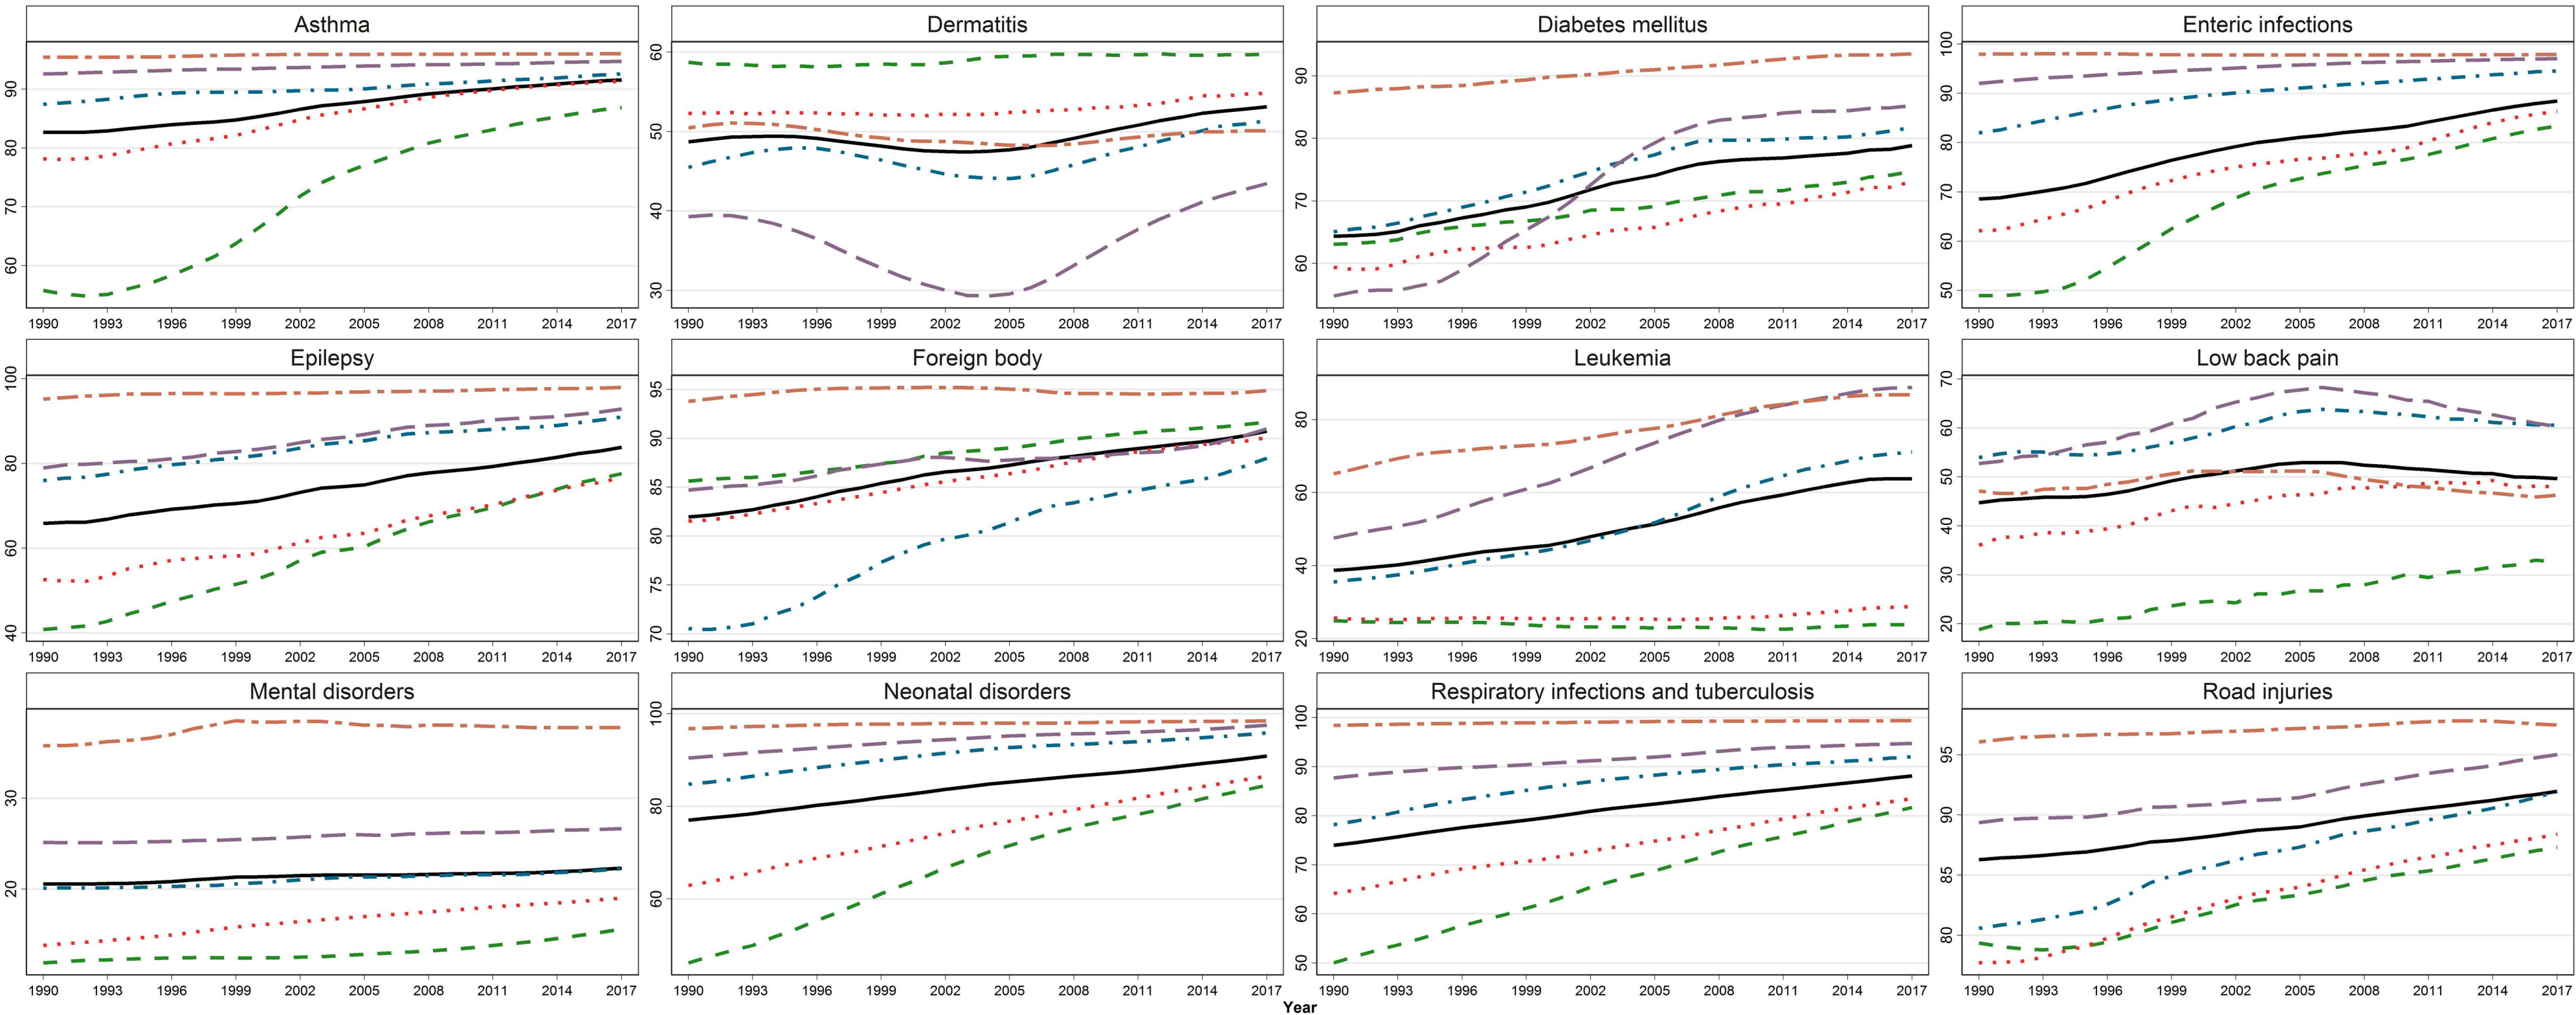

— Global — Low SDI ··· Low-middle SDI -·- Middle SDI - - - High-middle SDI - - - High SDI



Early Neonatal, Female

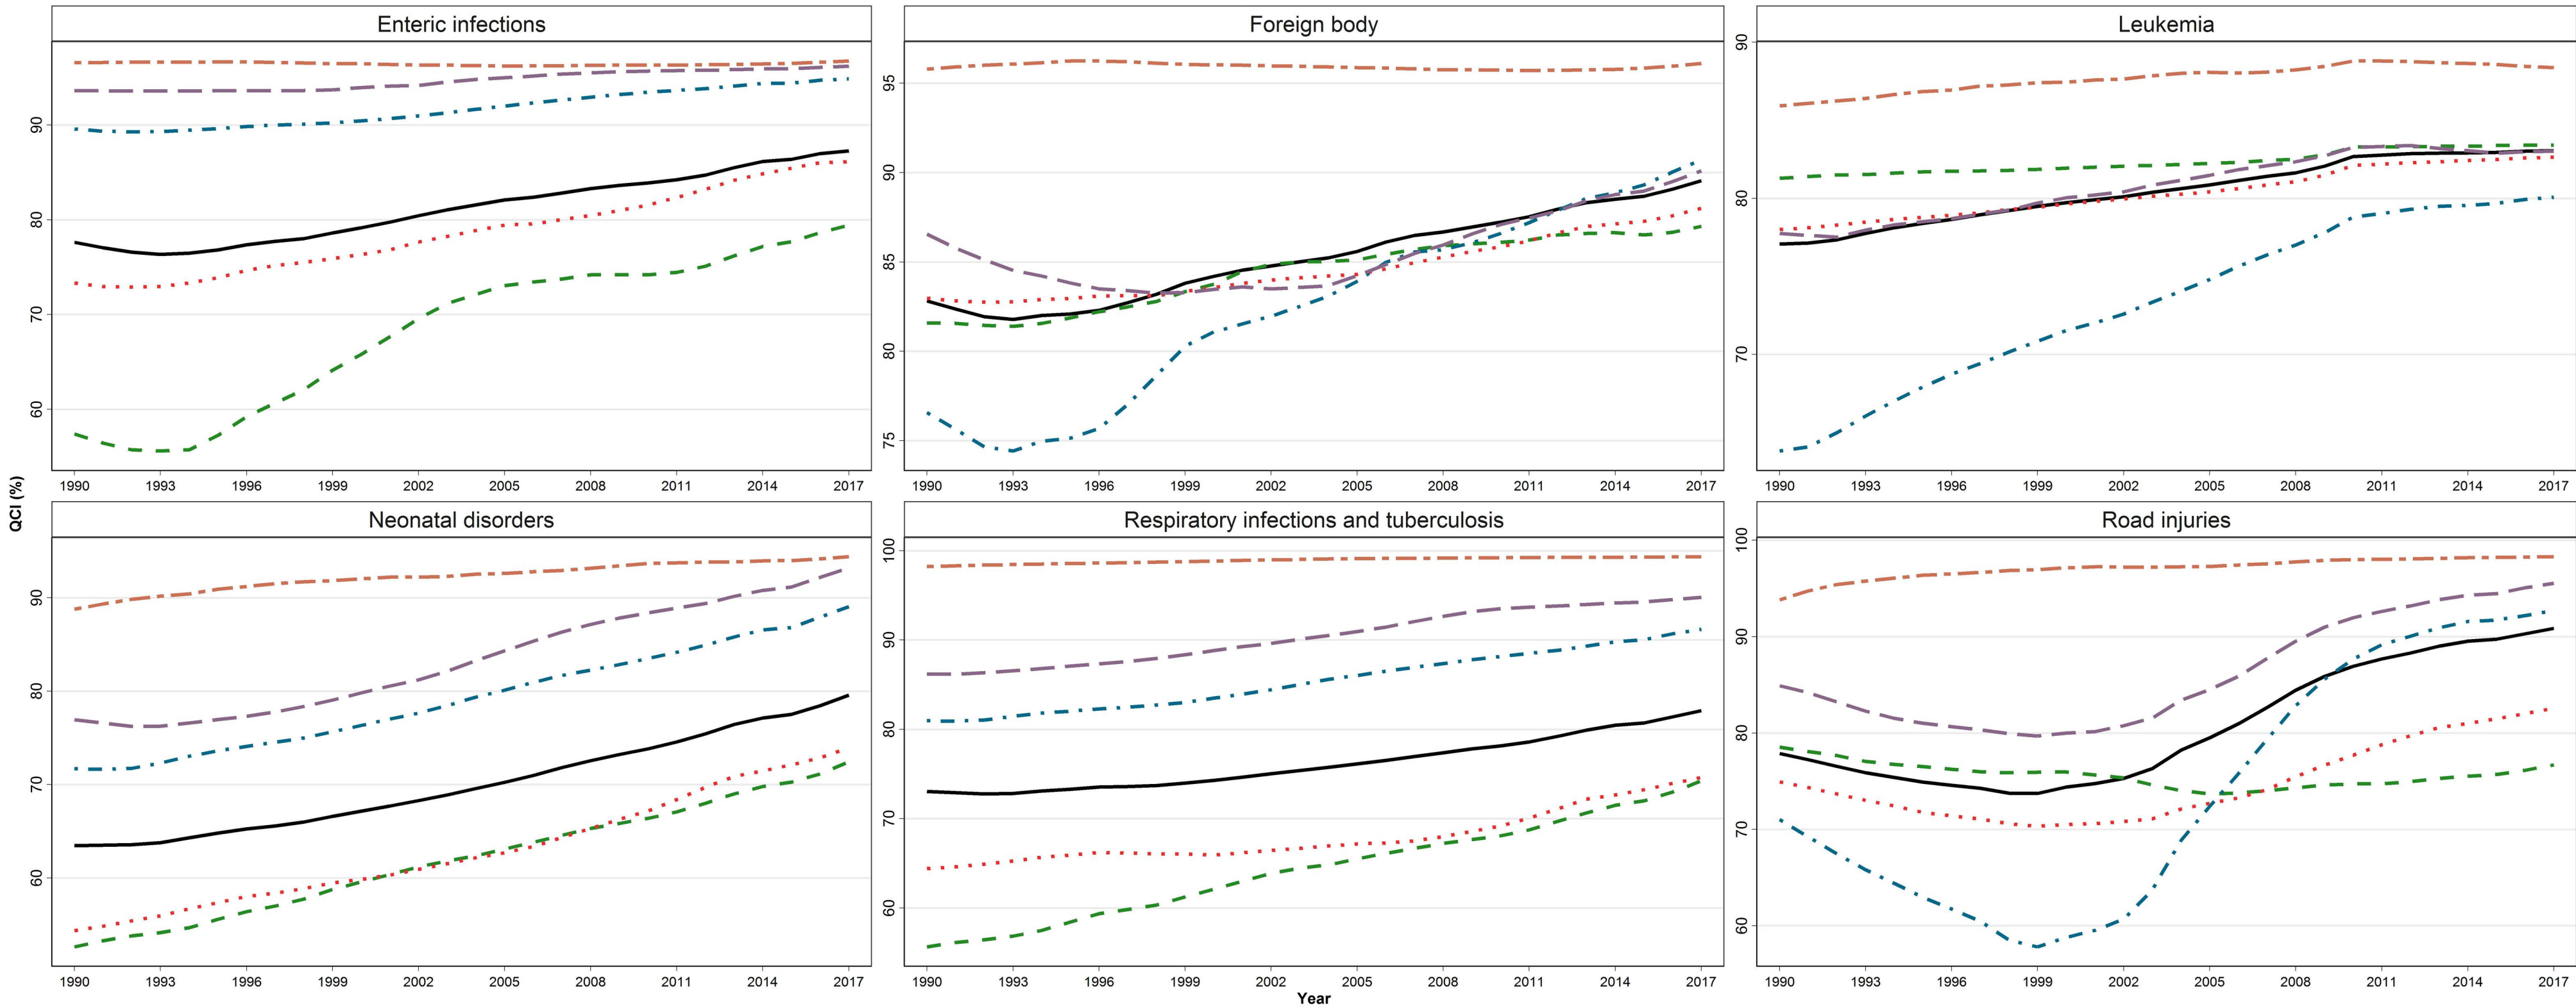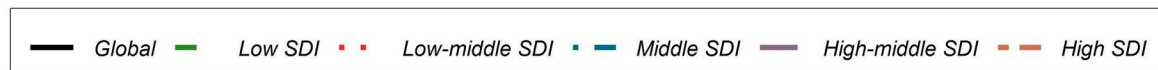

Late Neonatal, Female

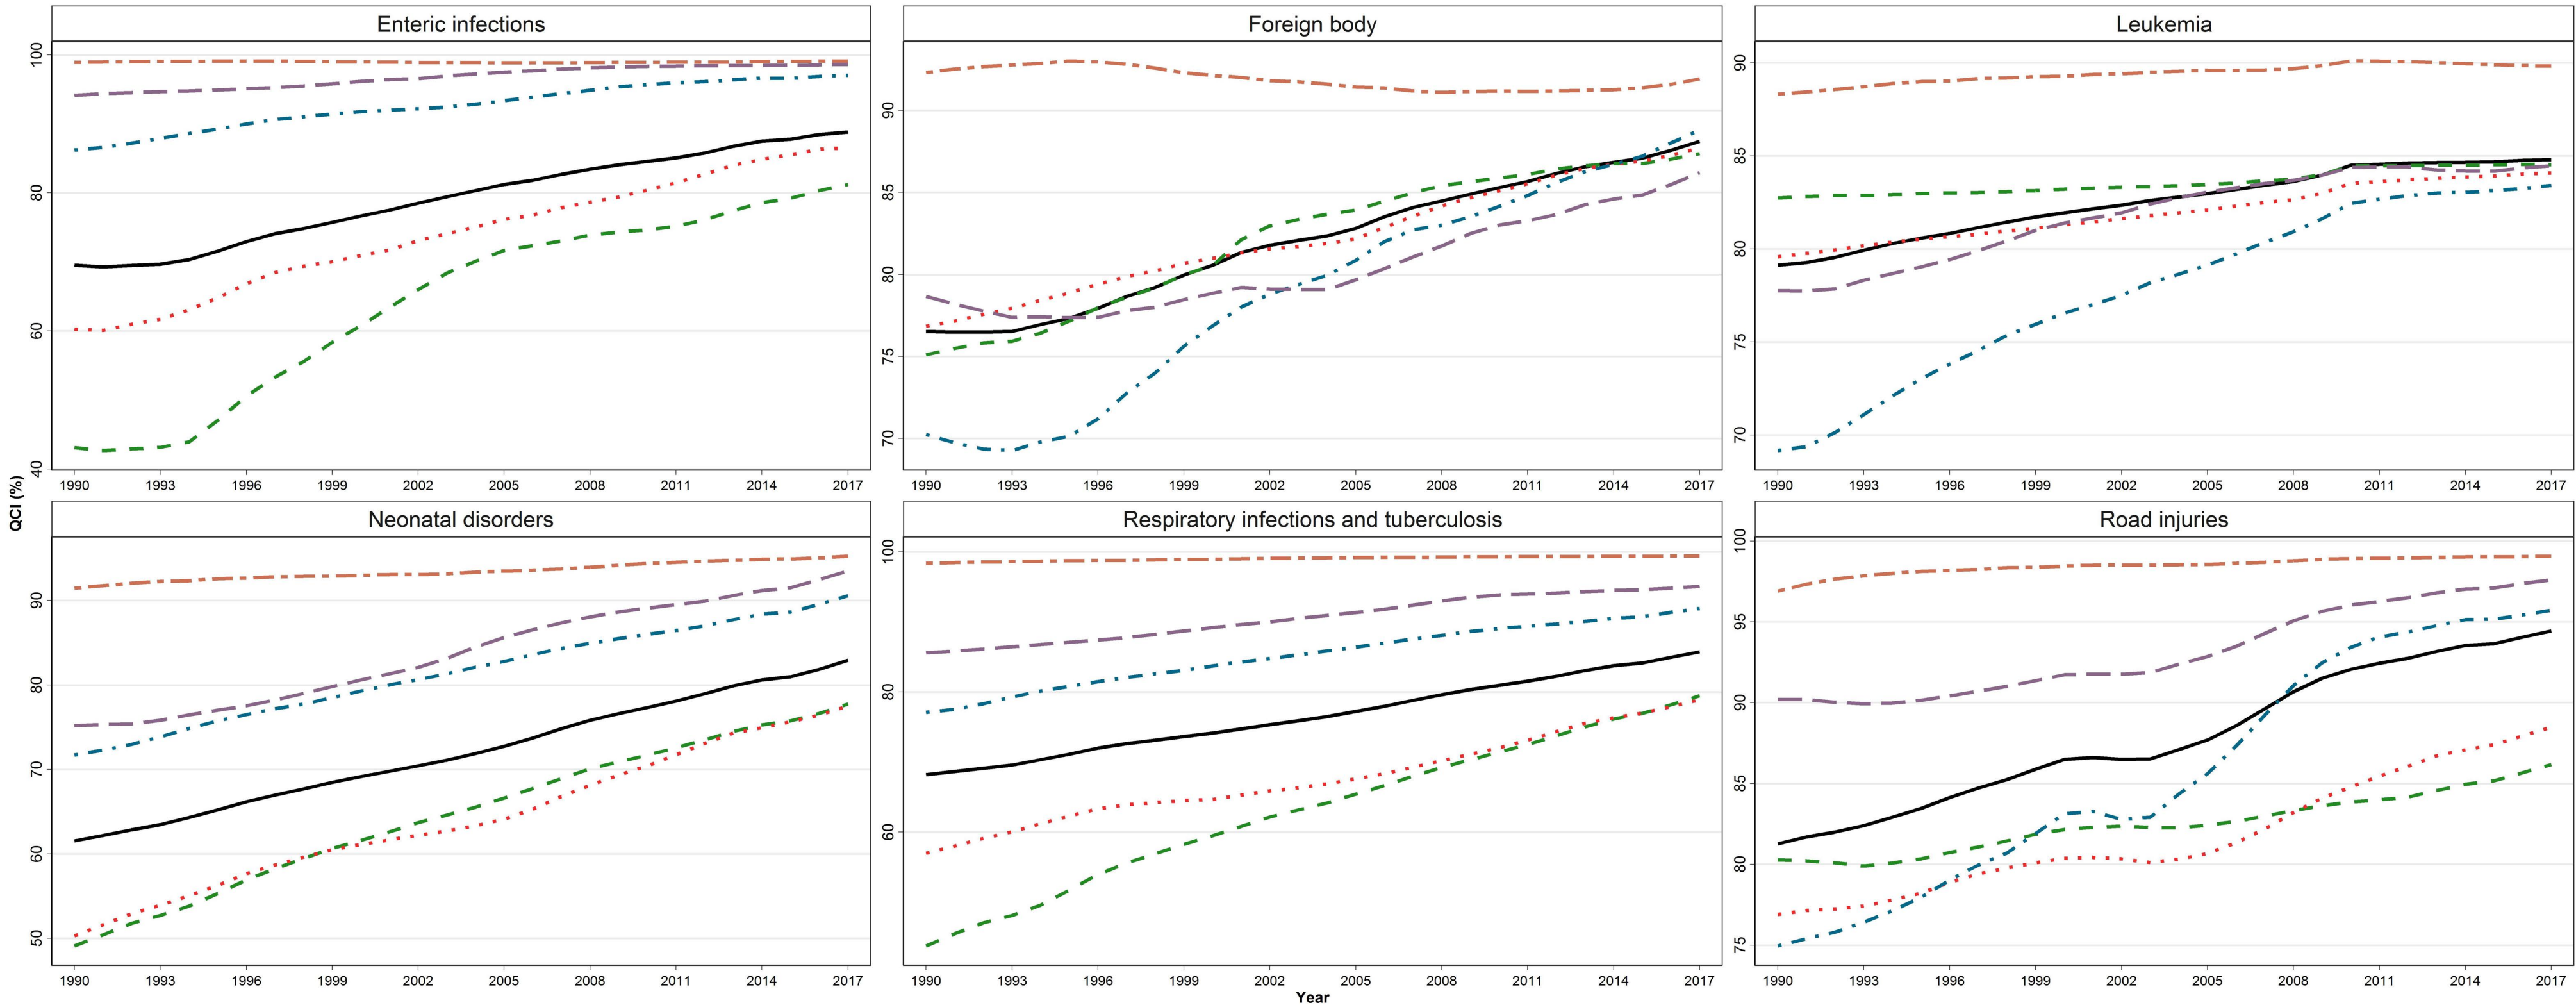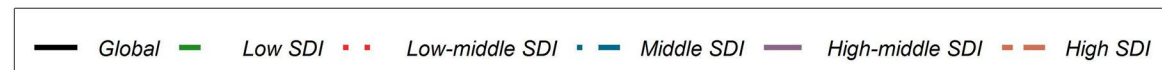



Post Neonatal, Female

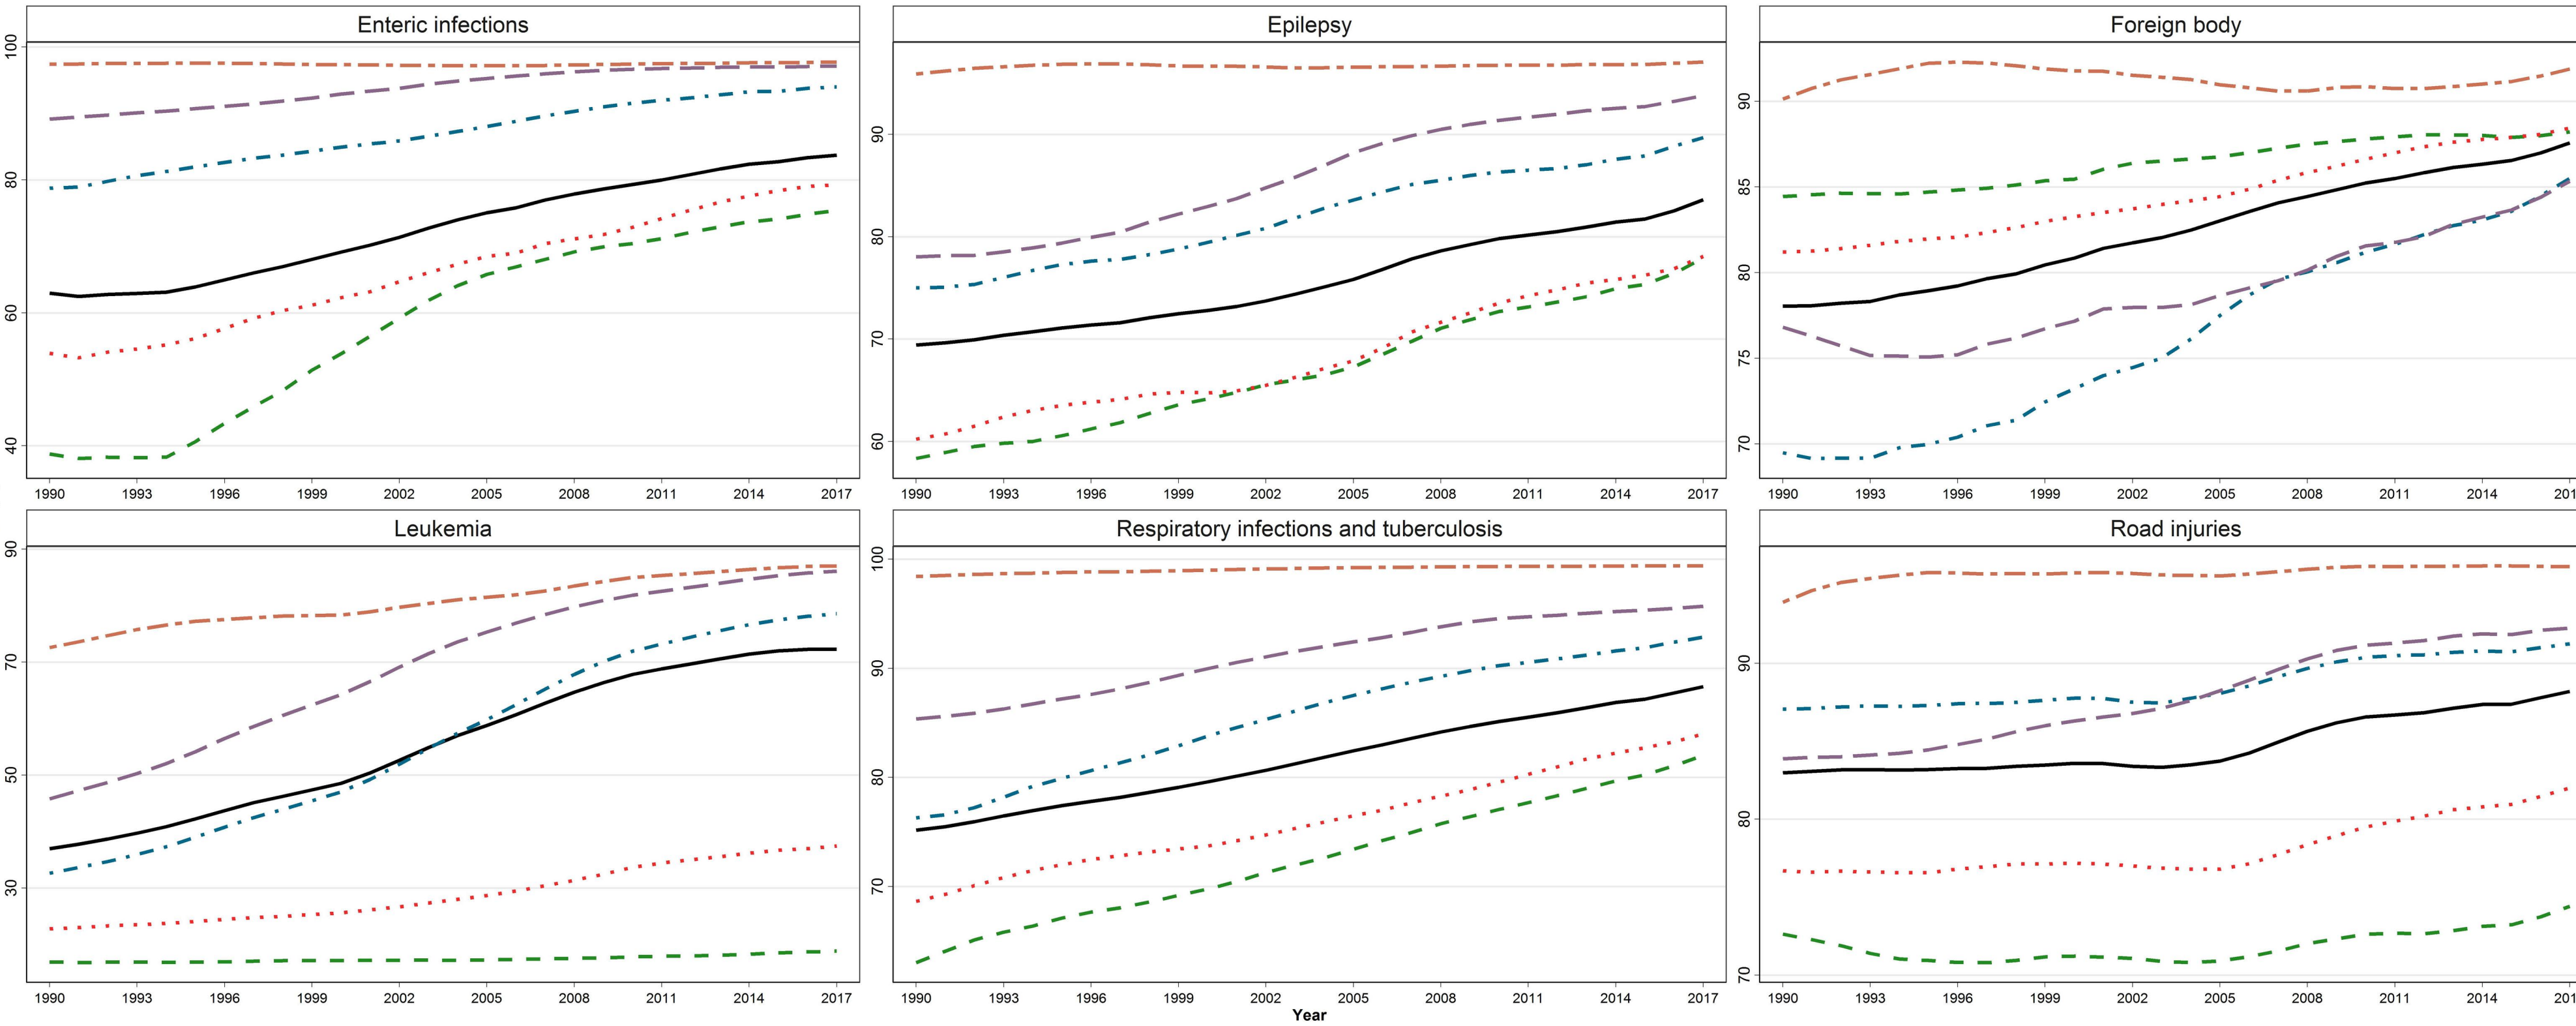

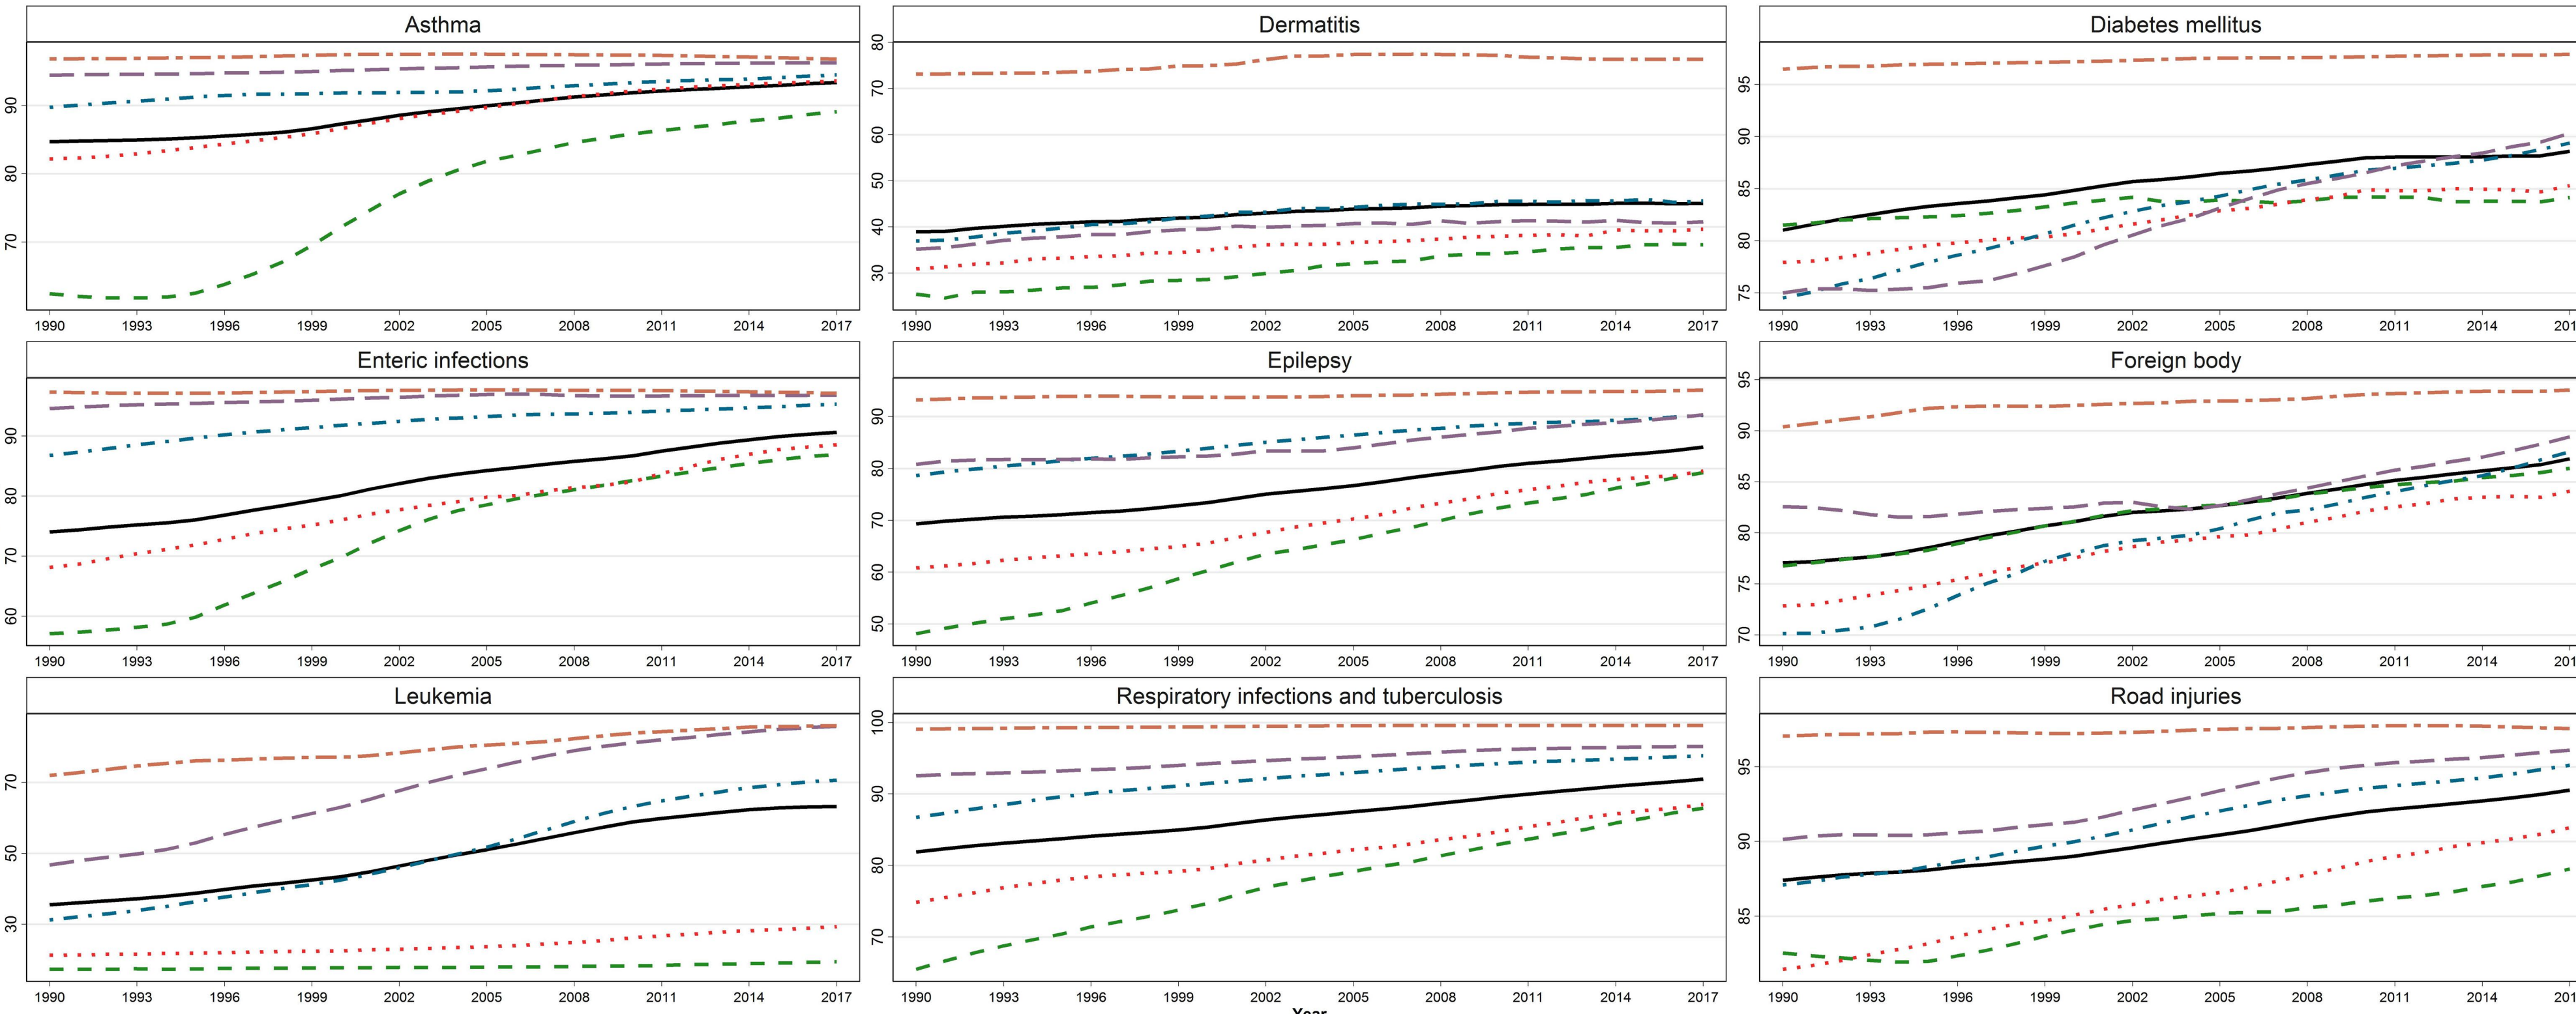



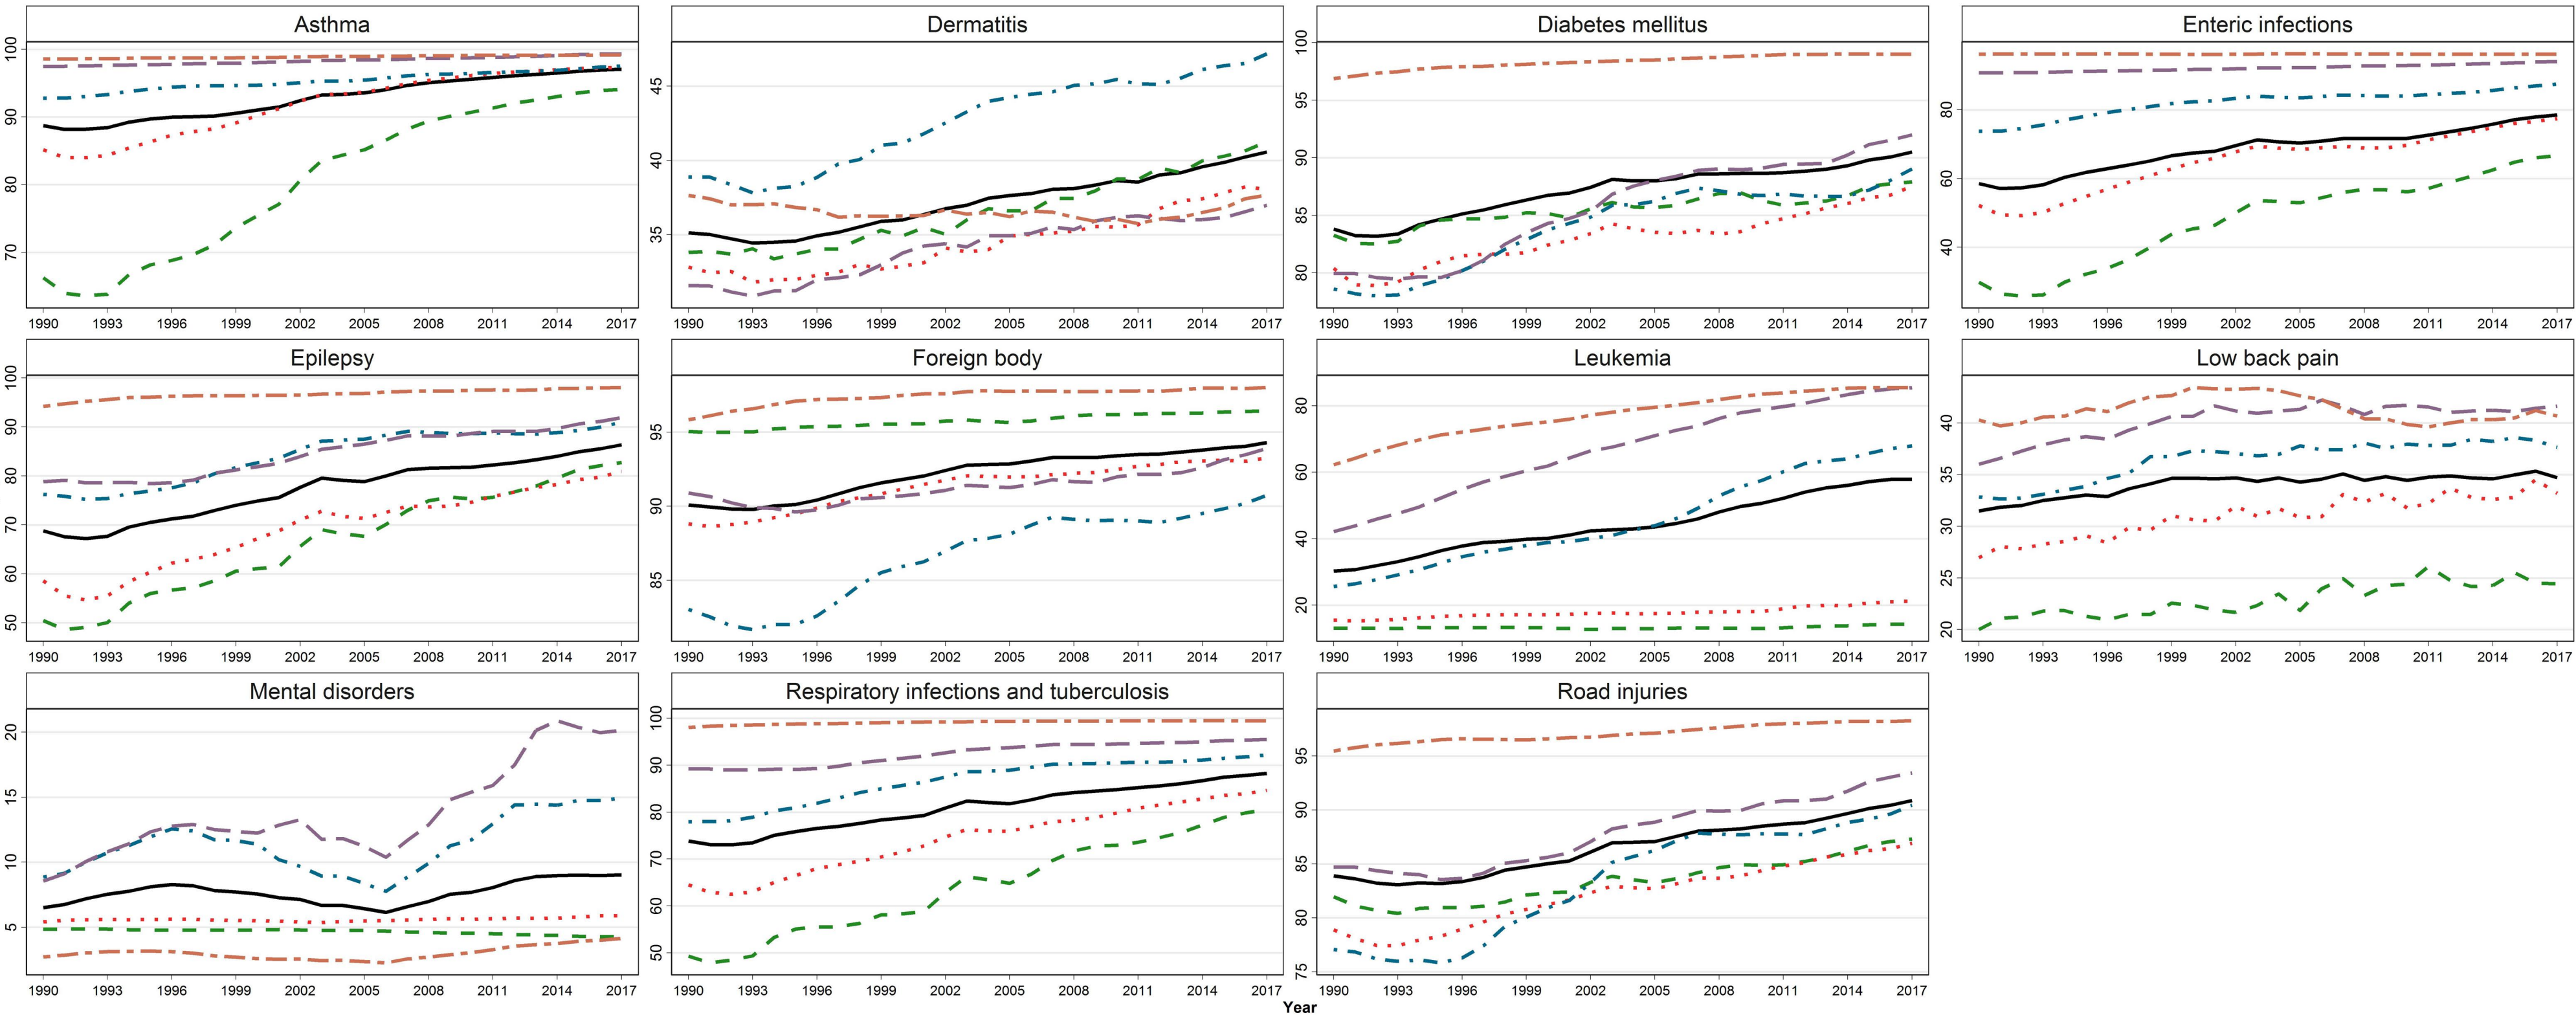

— Global — Low SDI ··· Low-middle SDI -·- Middle SDI - - High-middle SDI - - High SDI

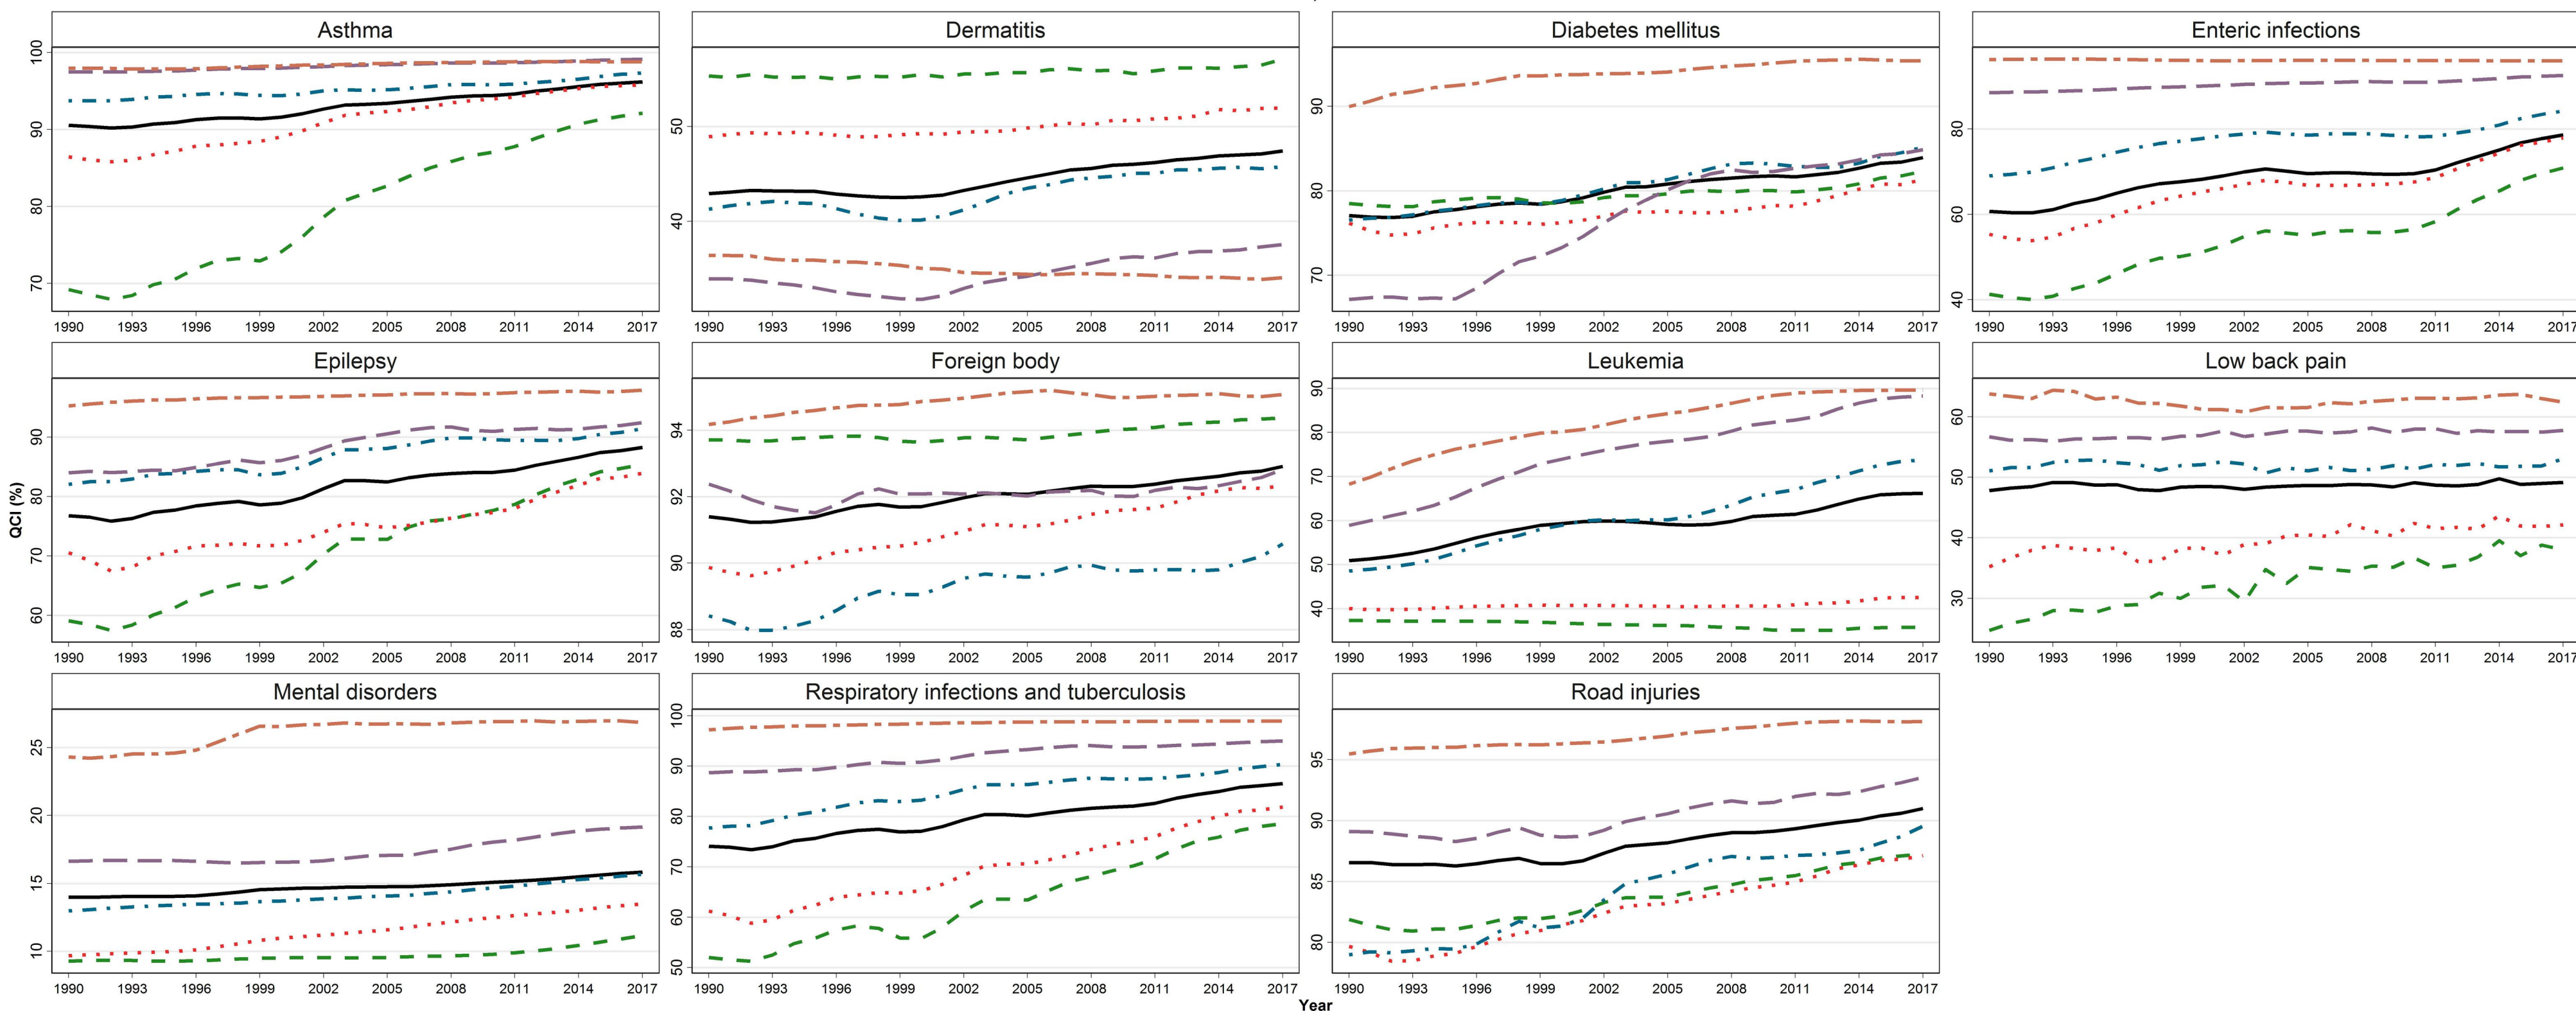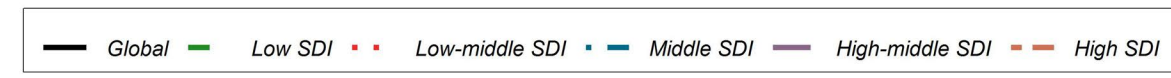



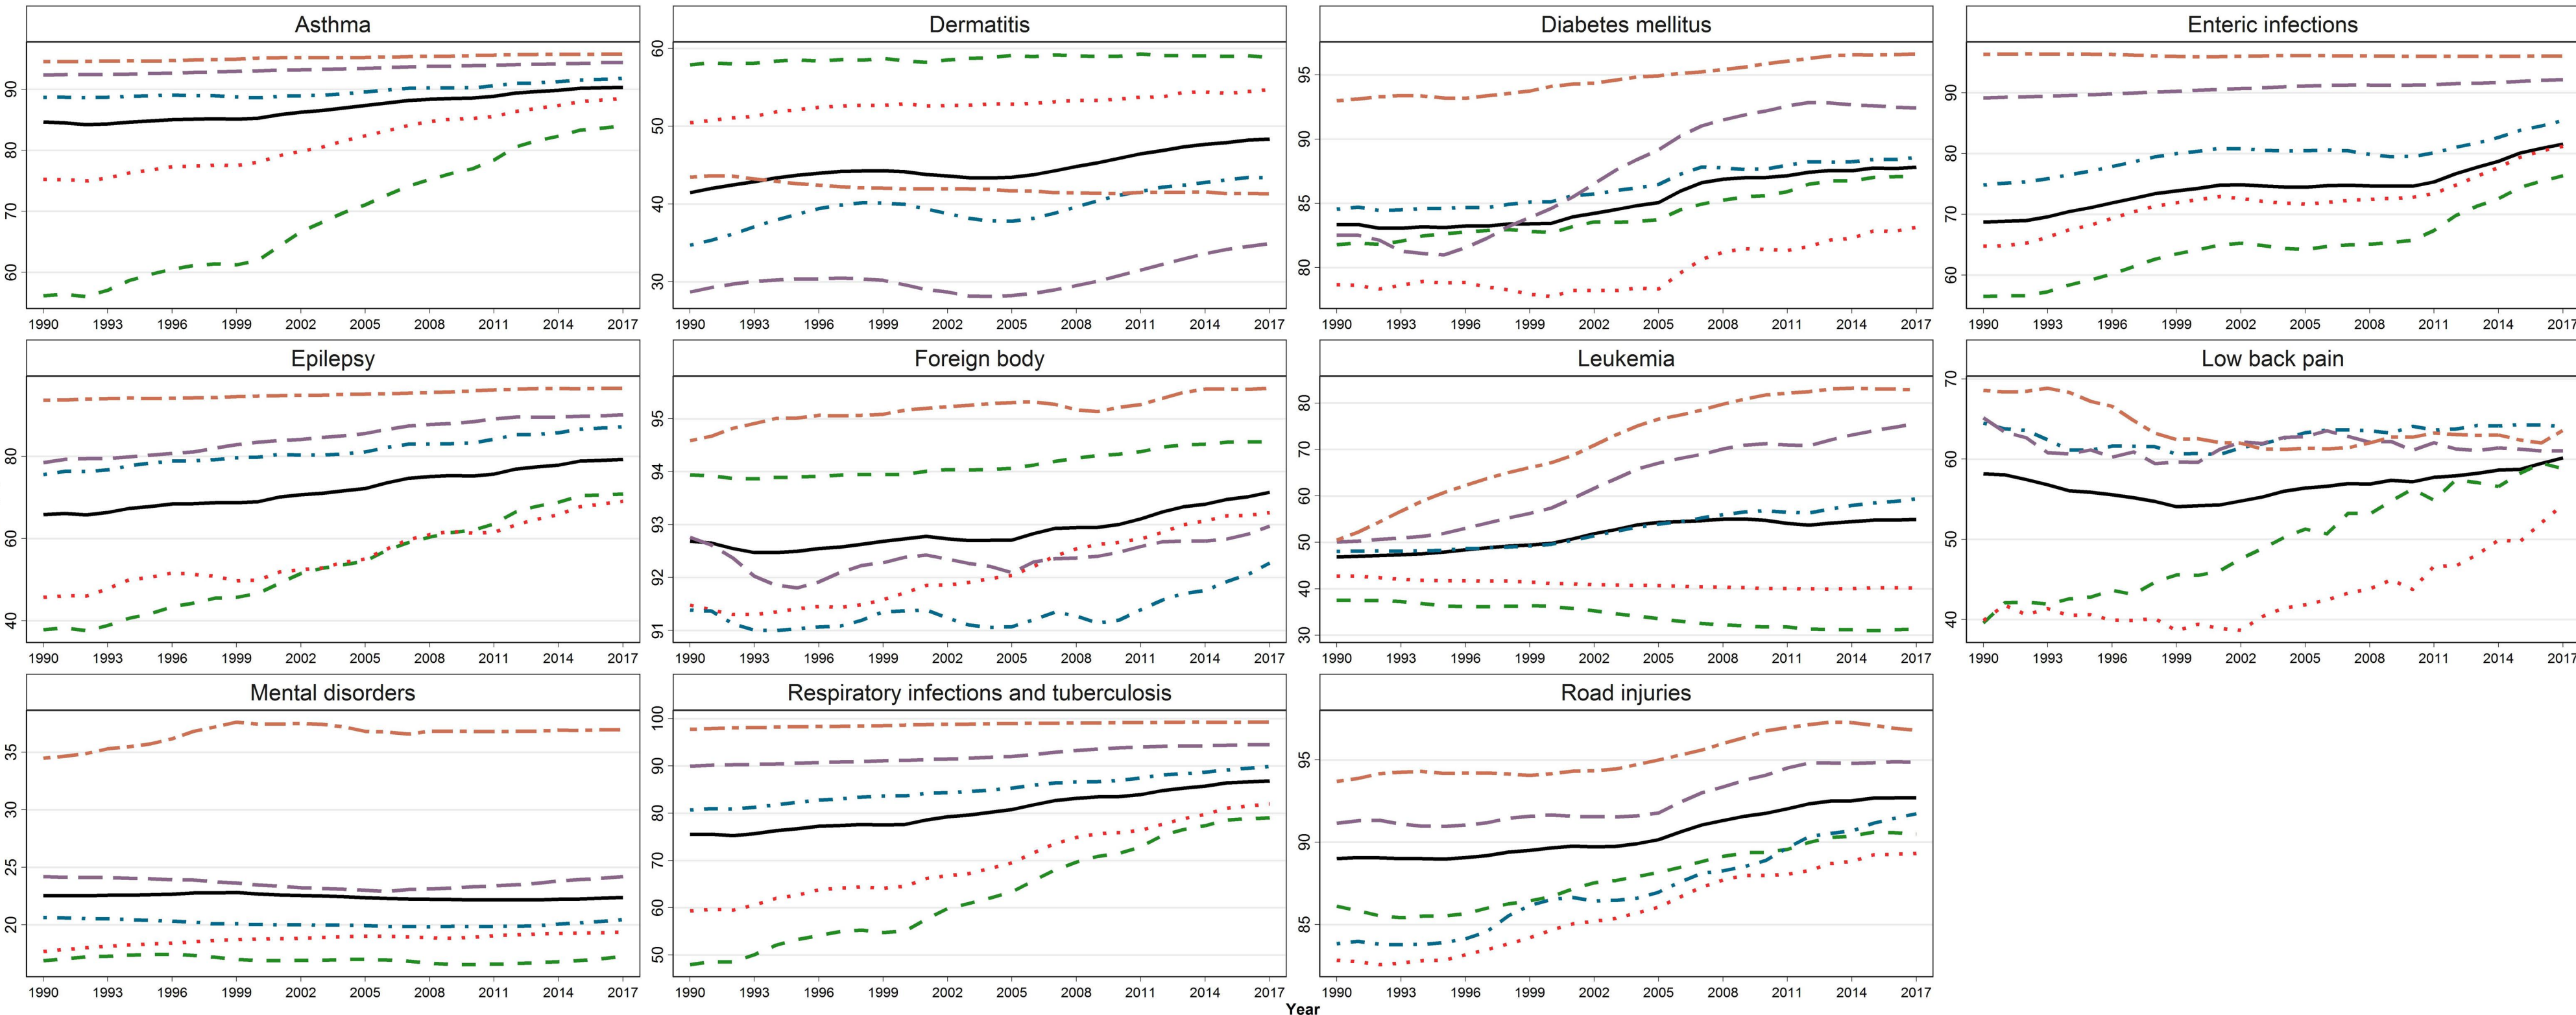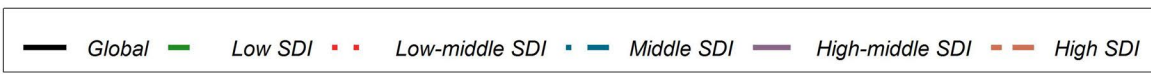



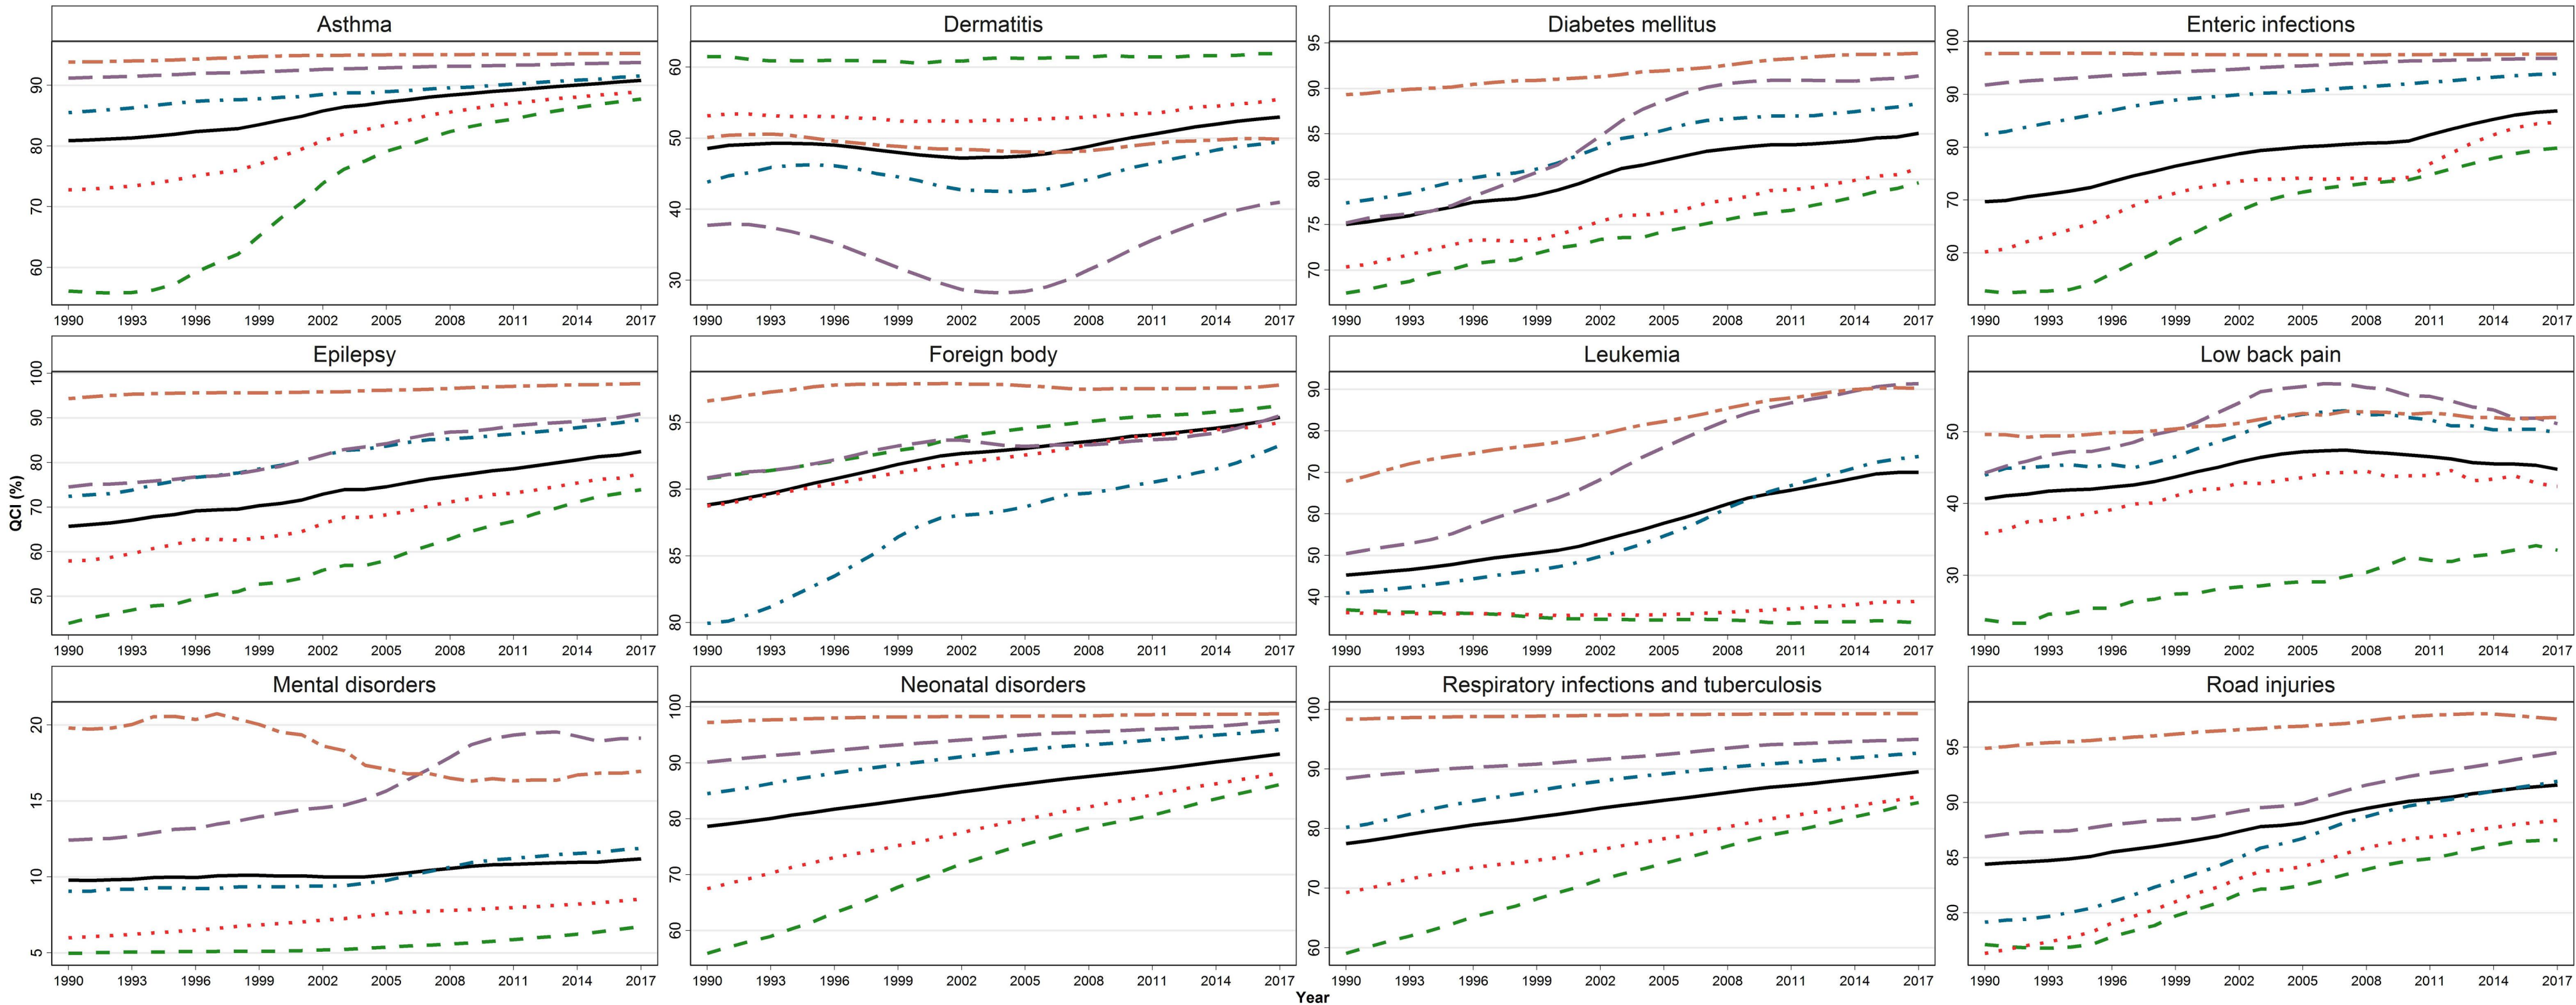

— Global
 - - - Low SDI
 . . . Low-middle SDI
 - . - . Middle SDI
 - - - - High-middle SDI
 - - - - High SDI



Early Neonatal, Male

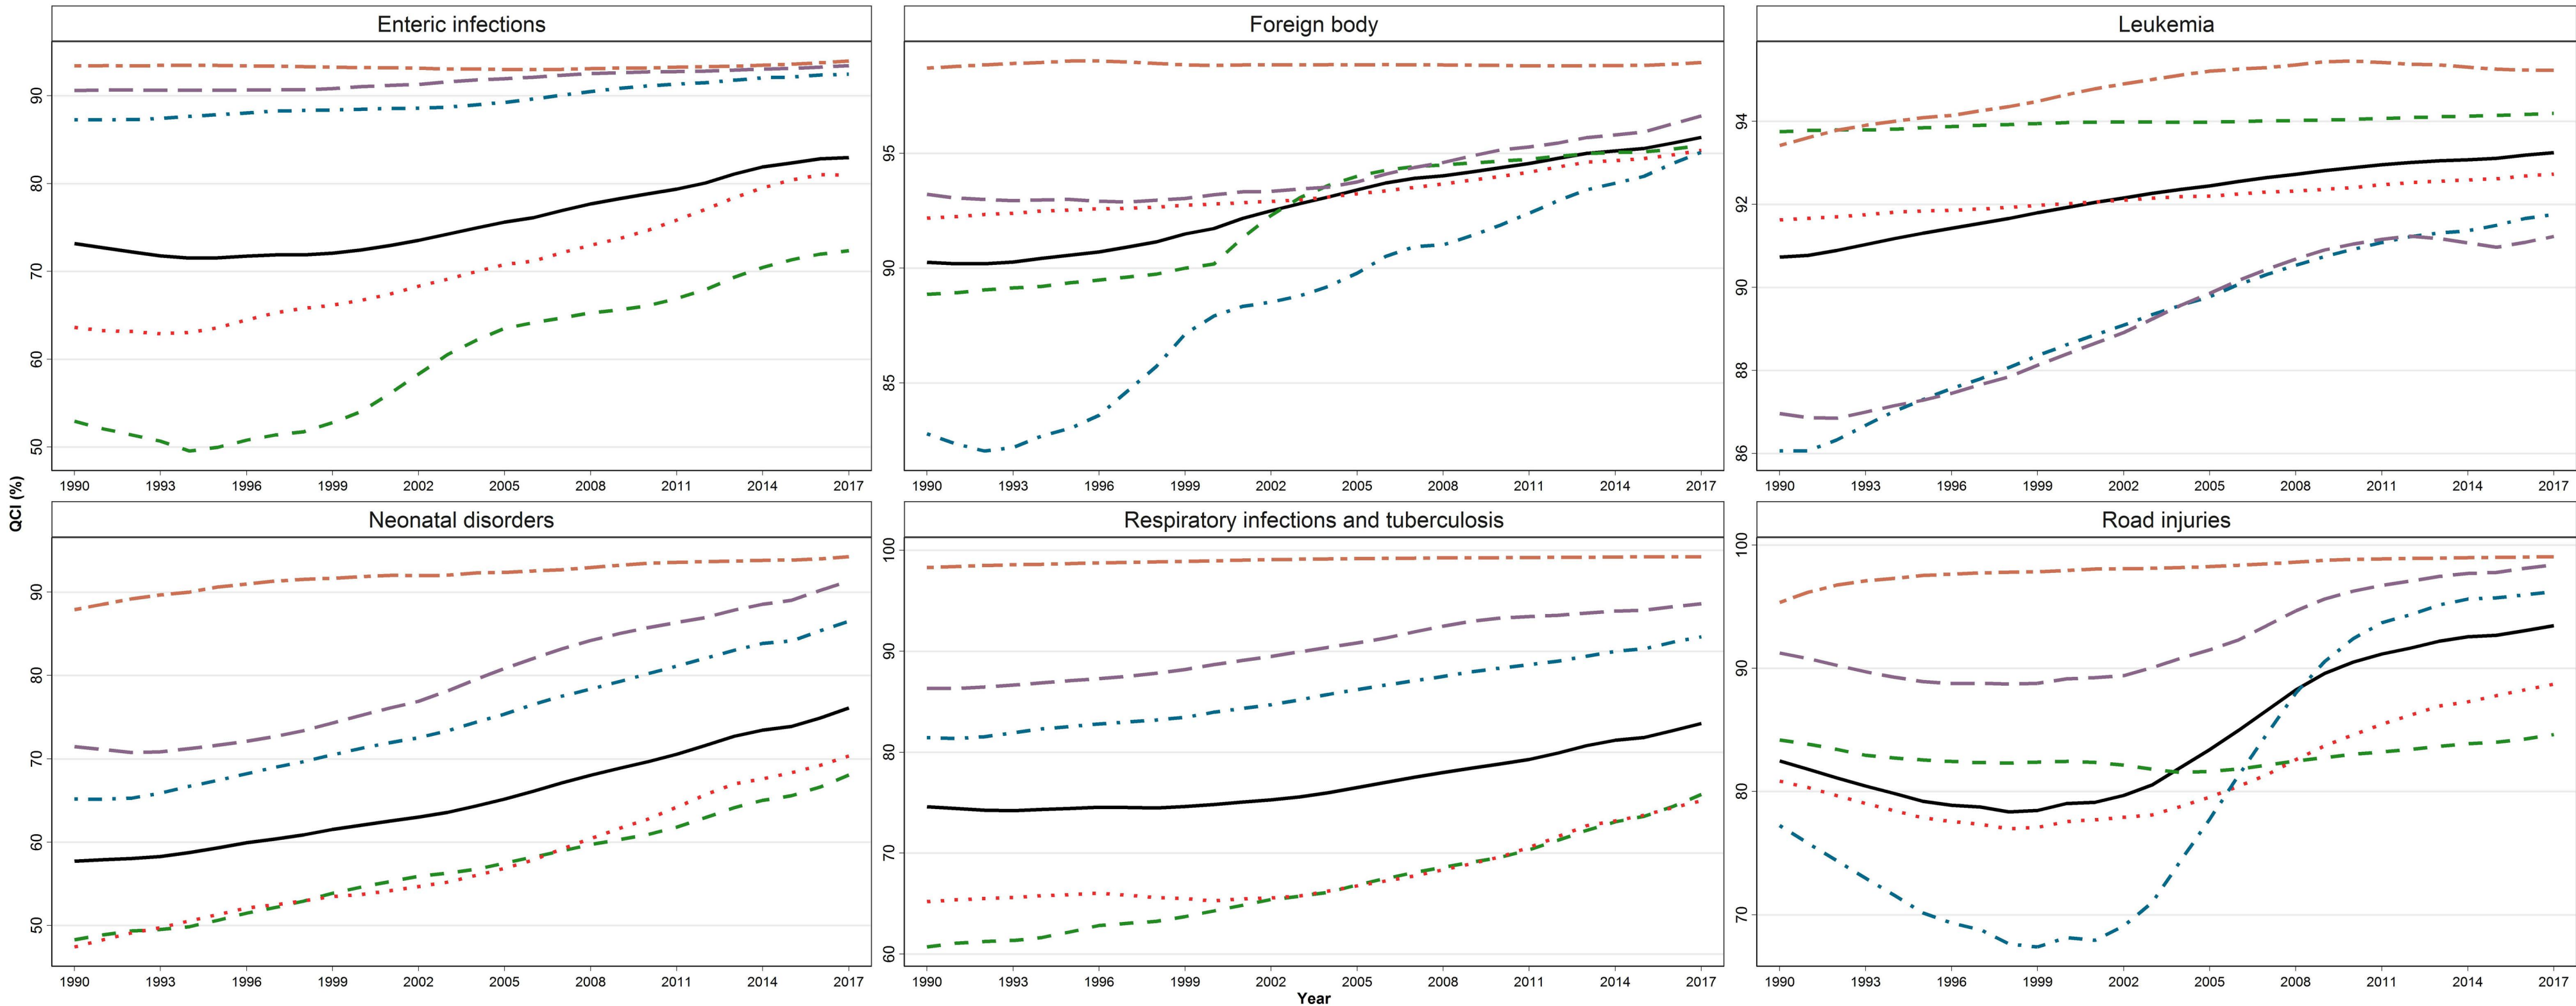

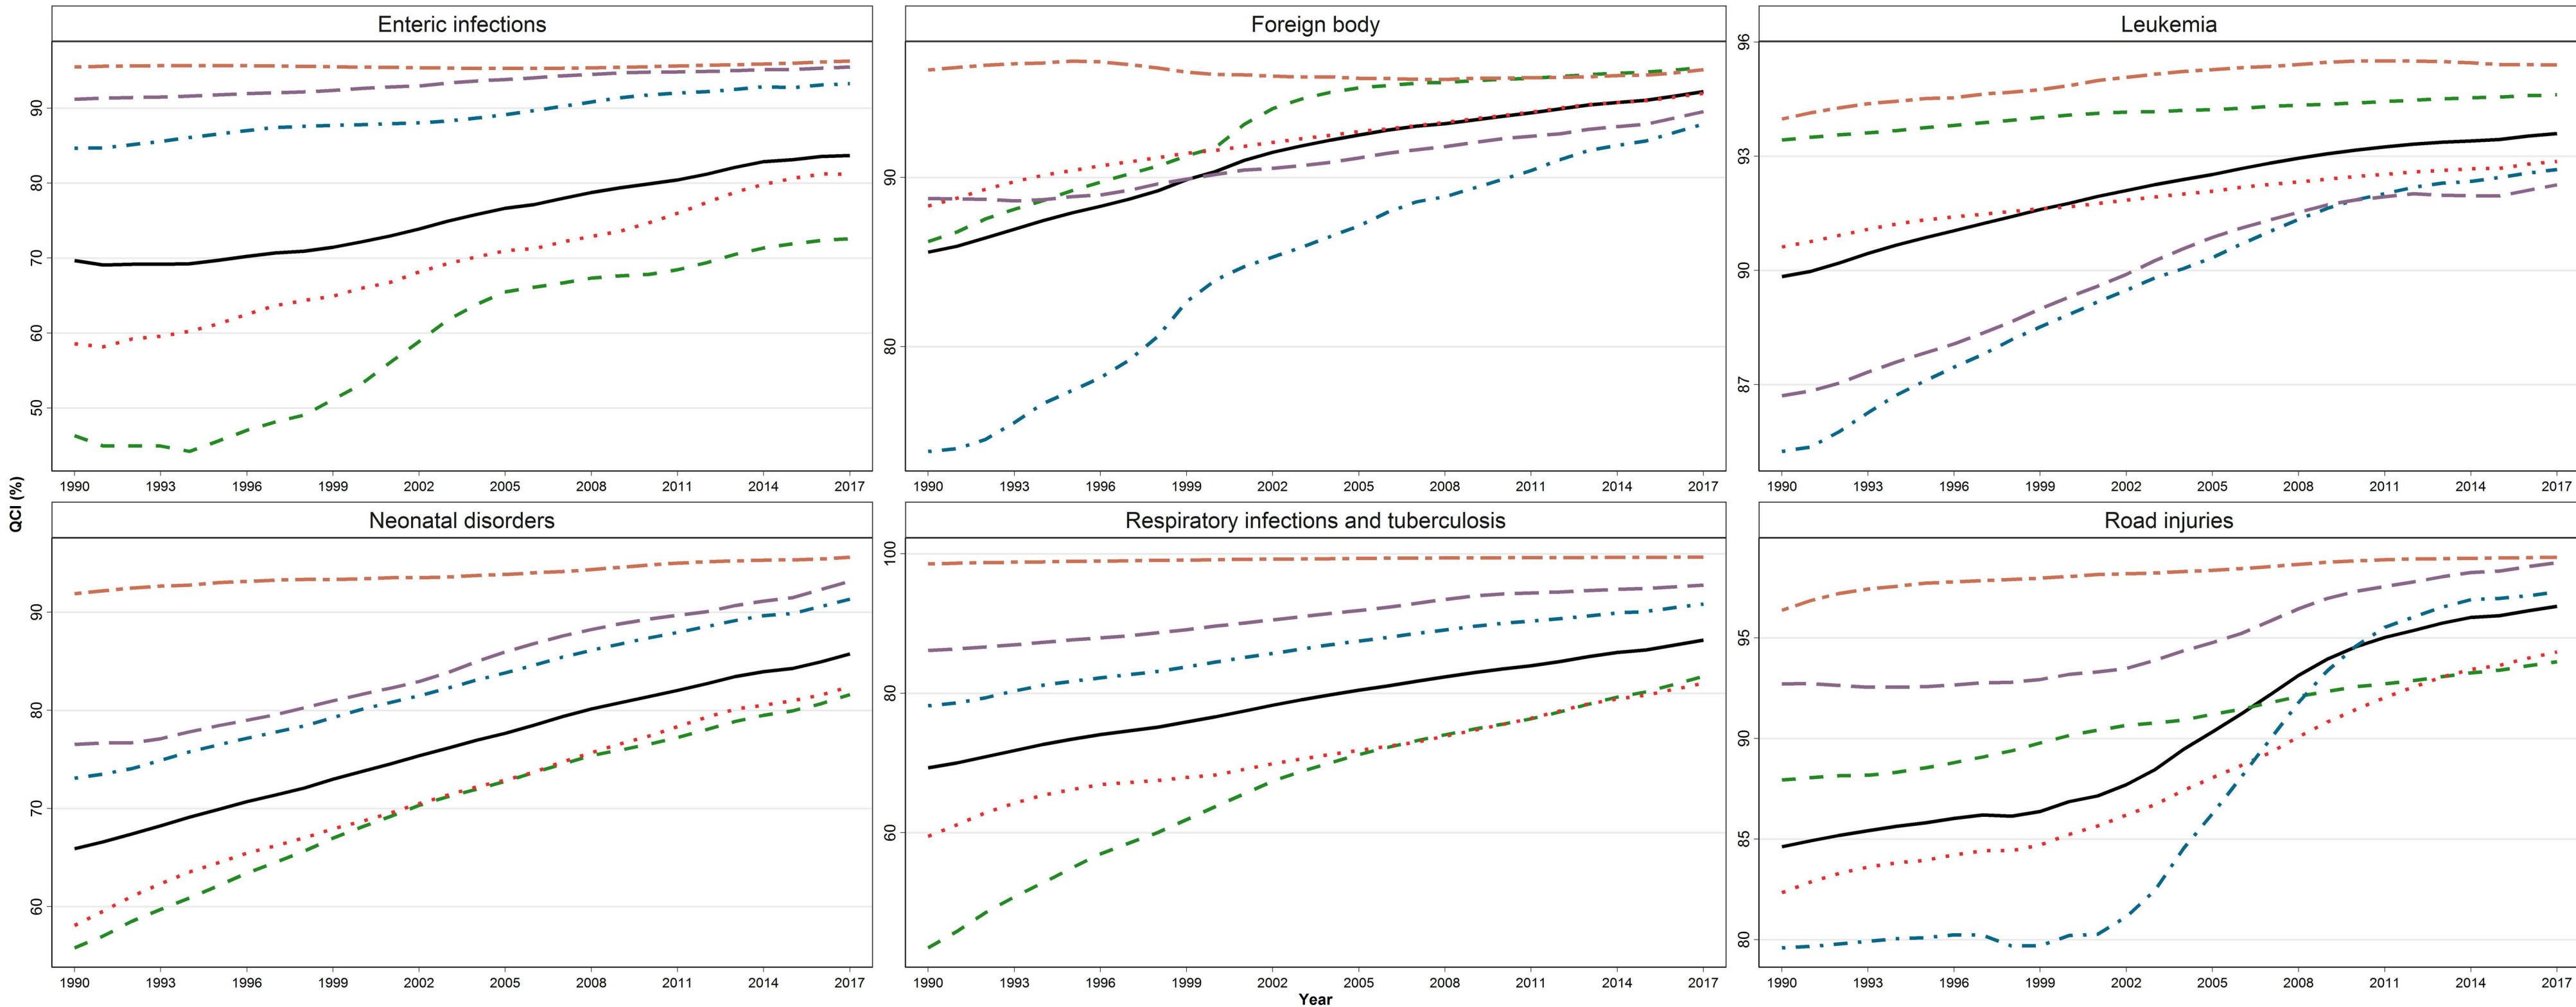



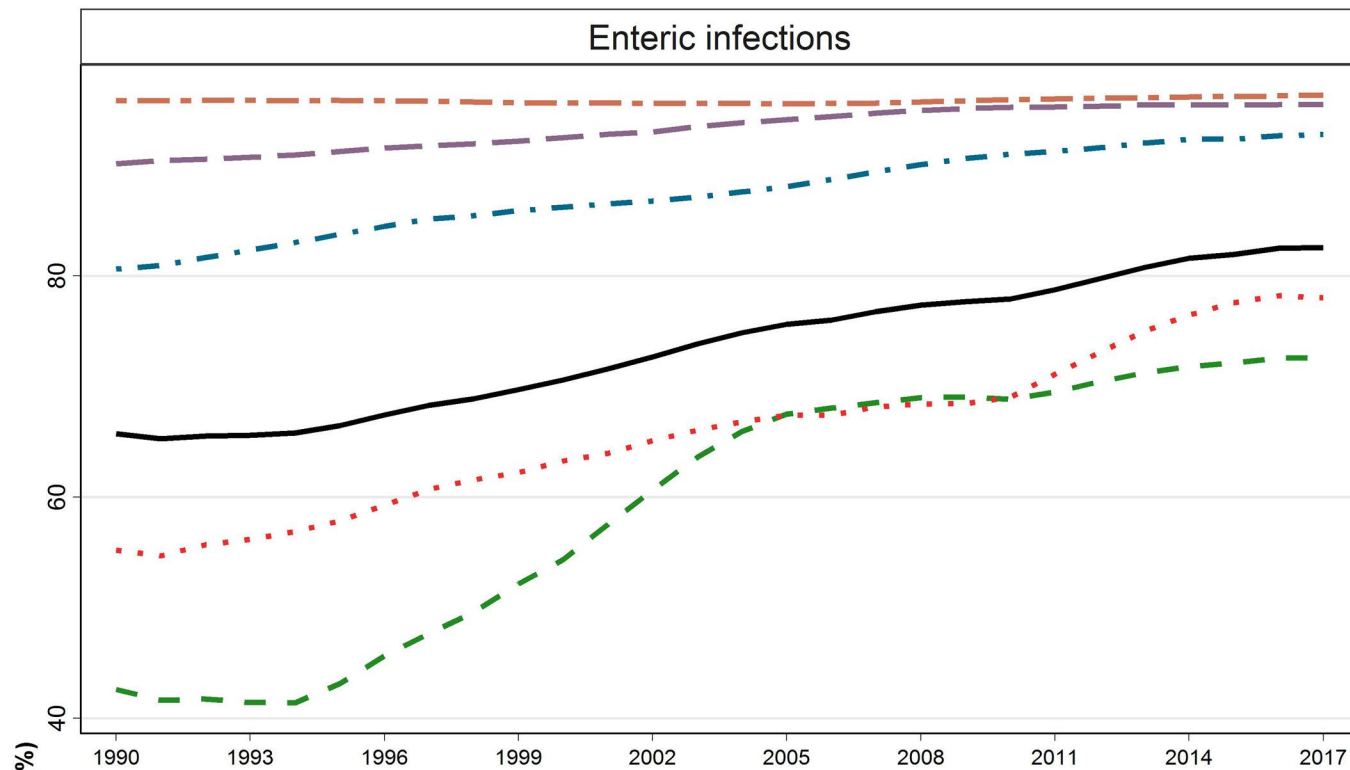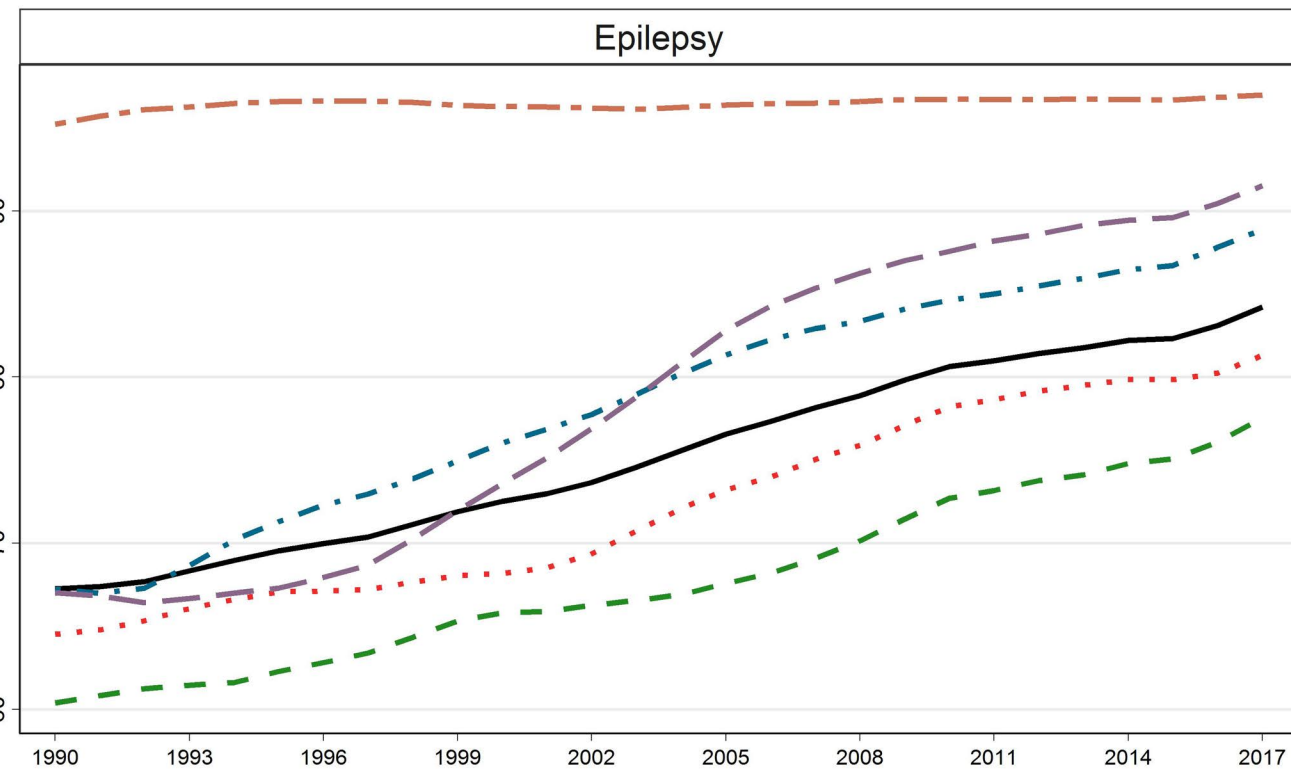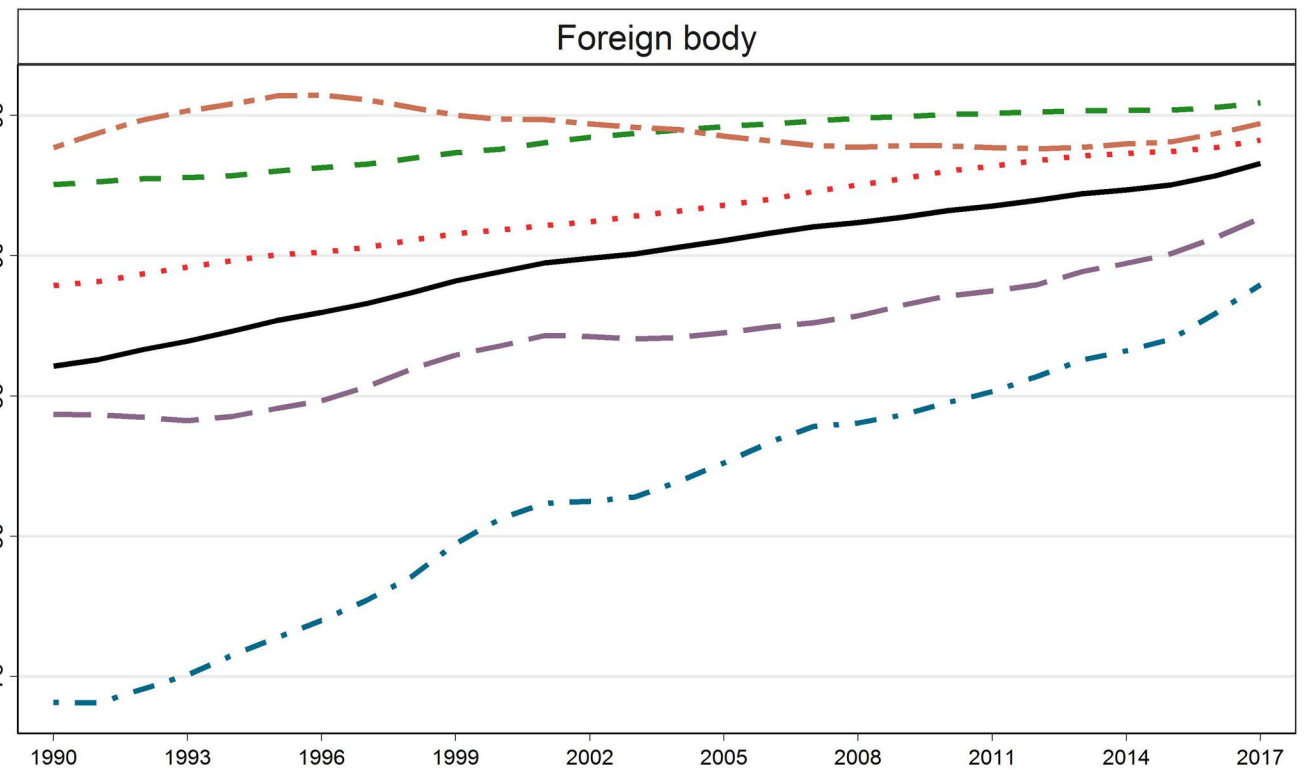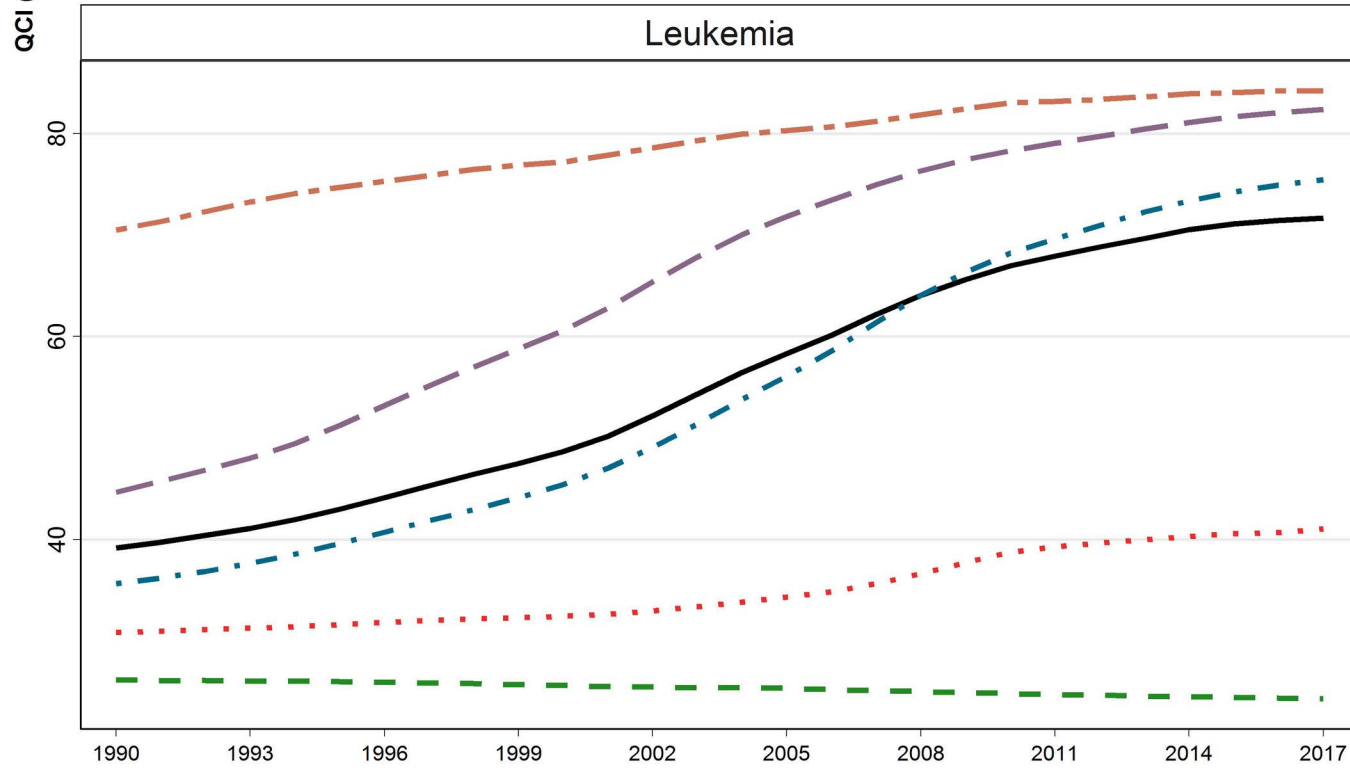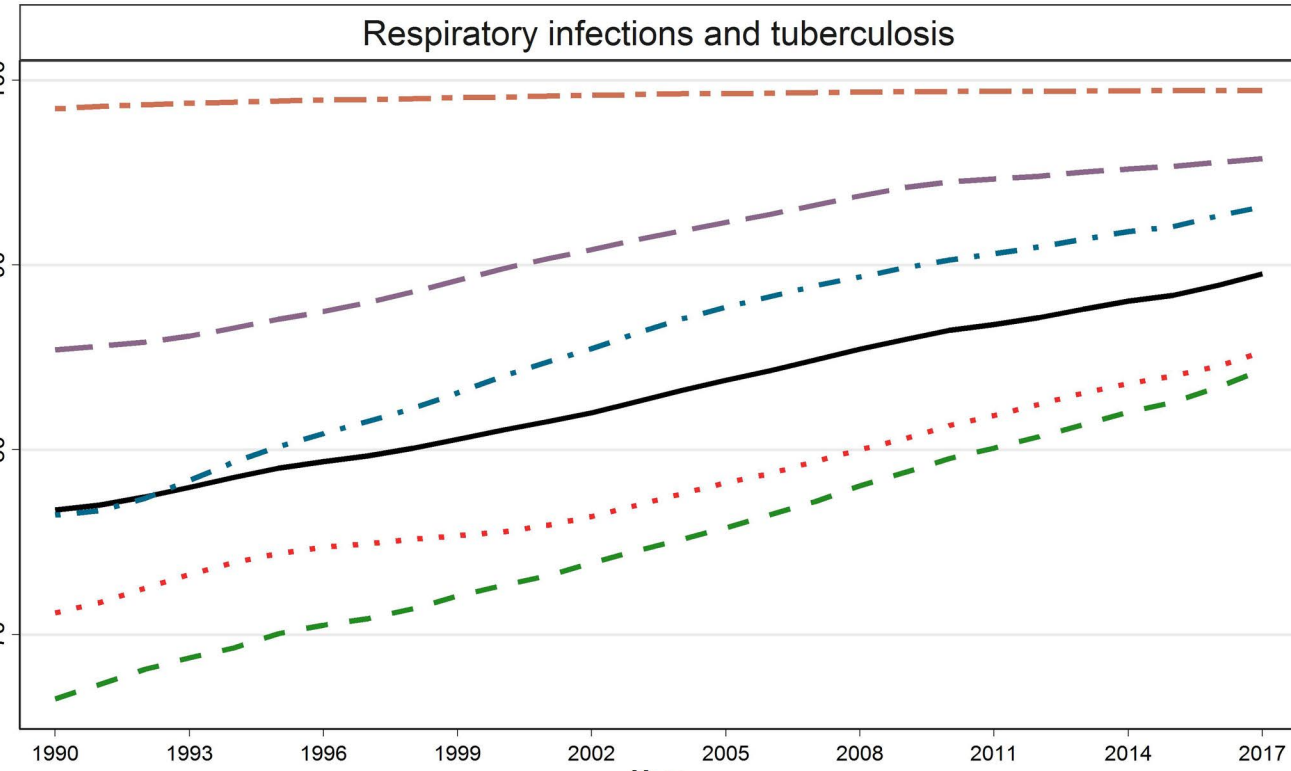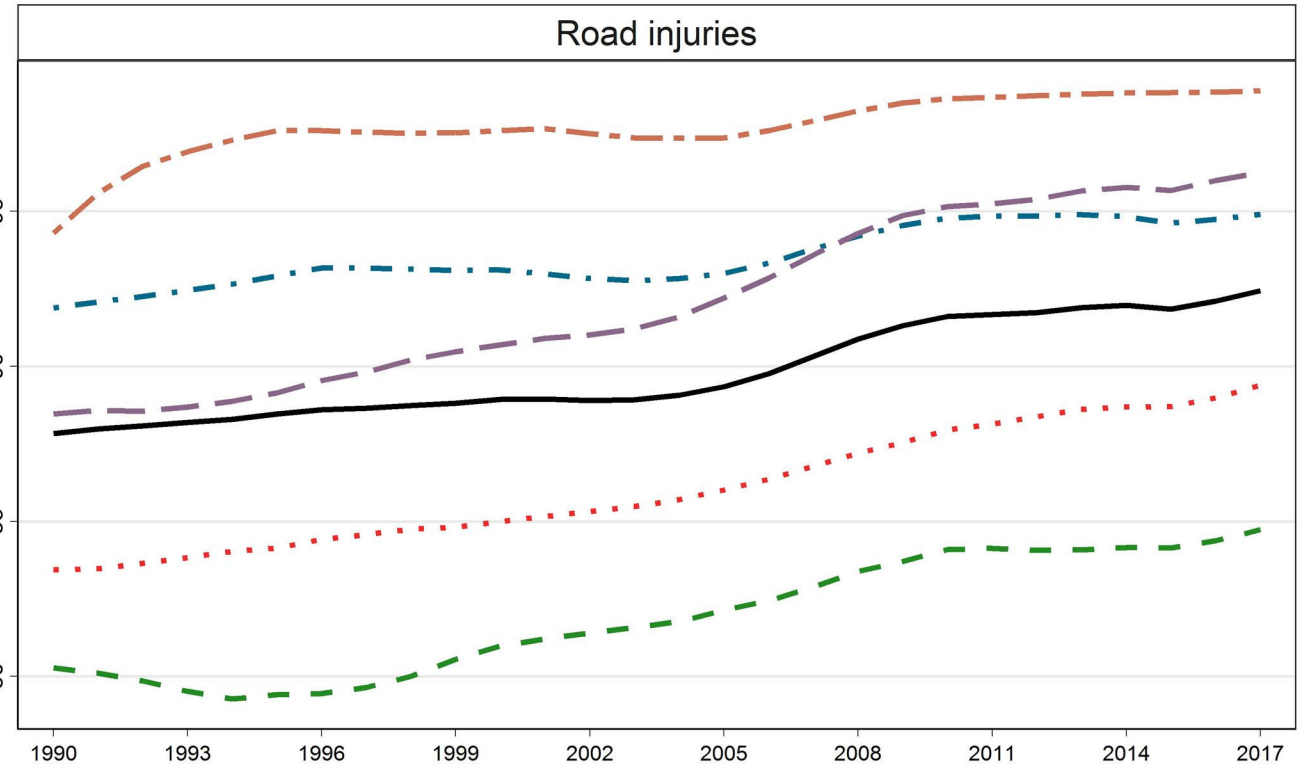

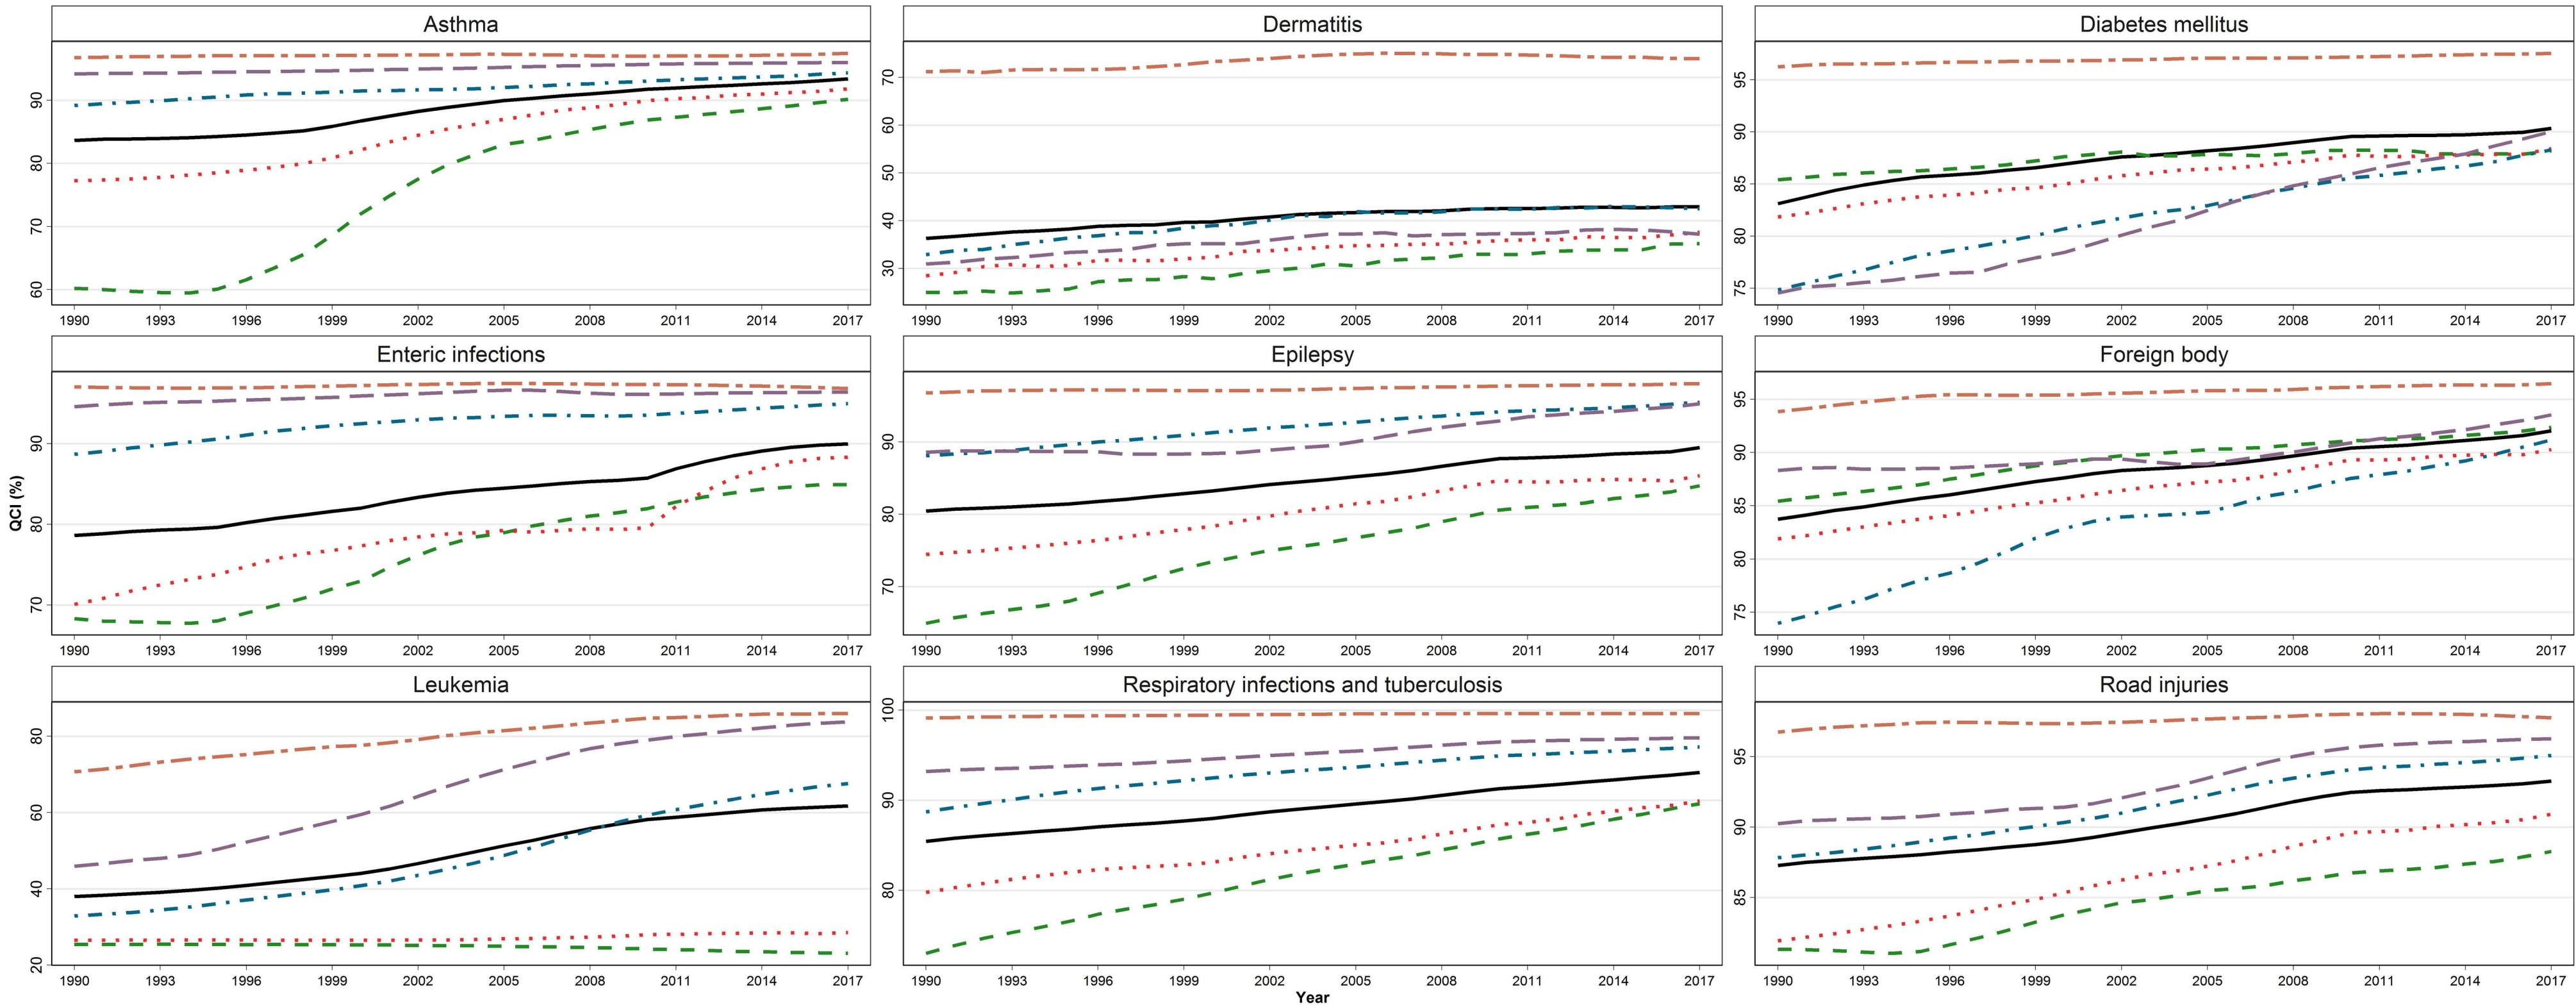

— Global 
 - - - Low SDI 
 . . . Low-middle SDI 
 - . - . Middle SDI 
 - - - High-middle SDI 
 - - - High SDI



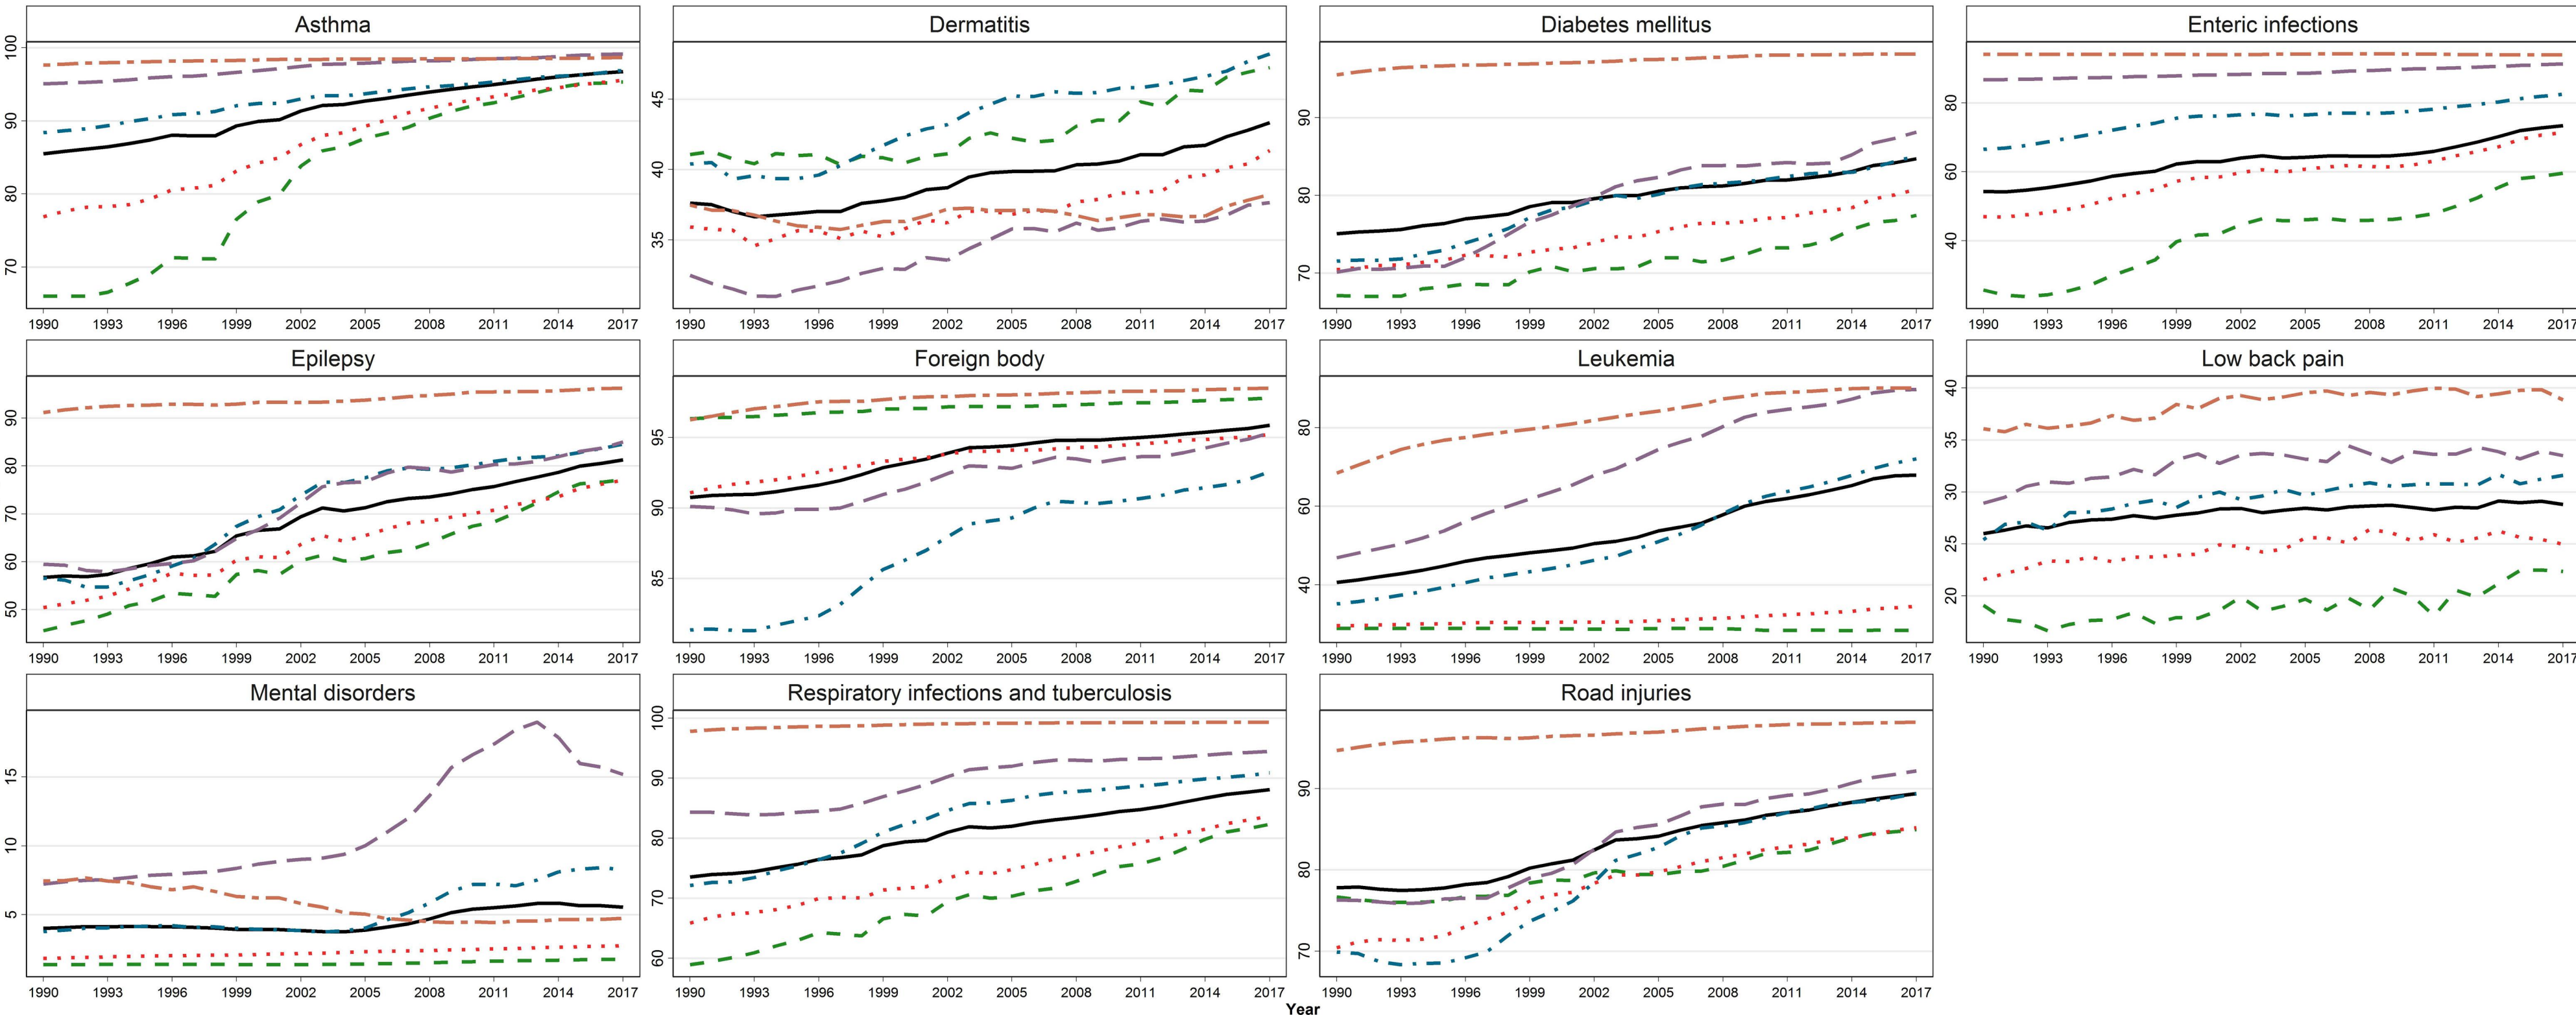

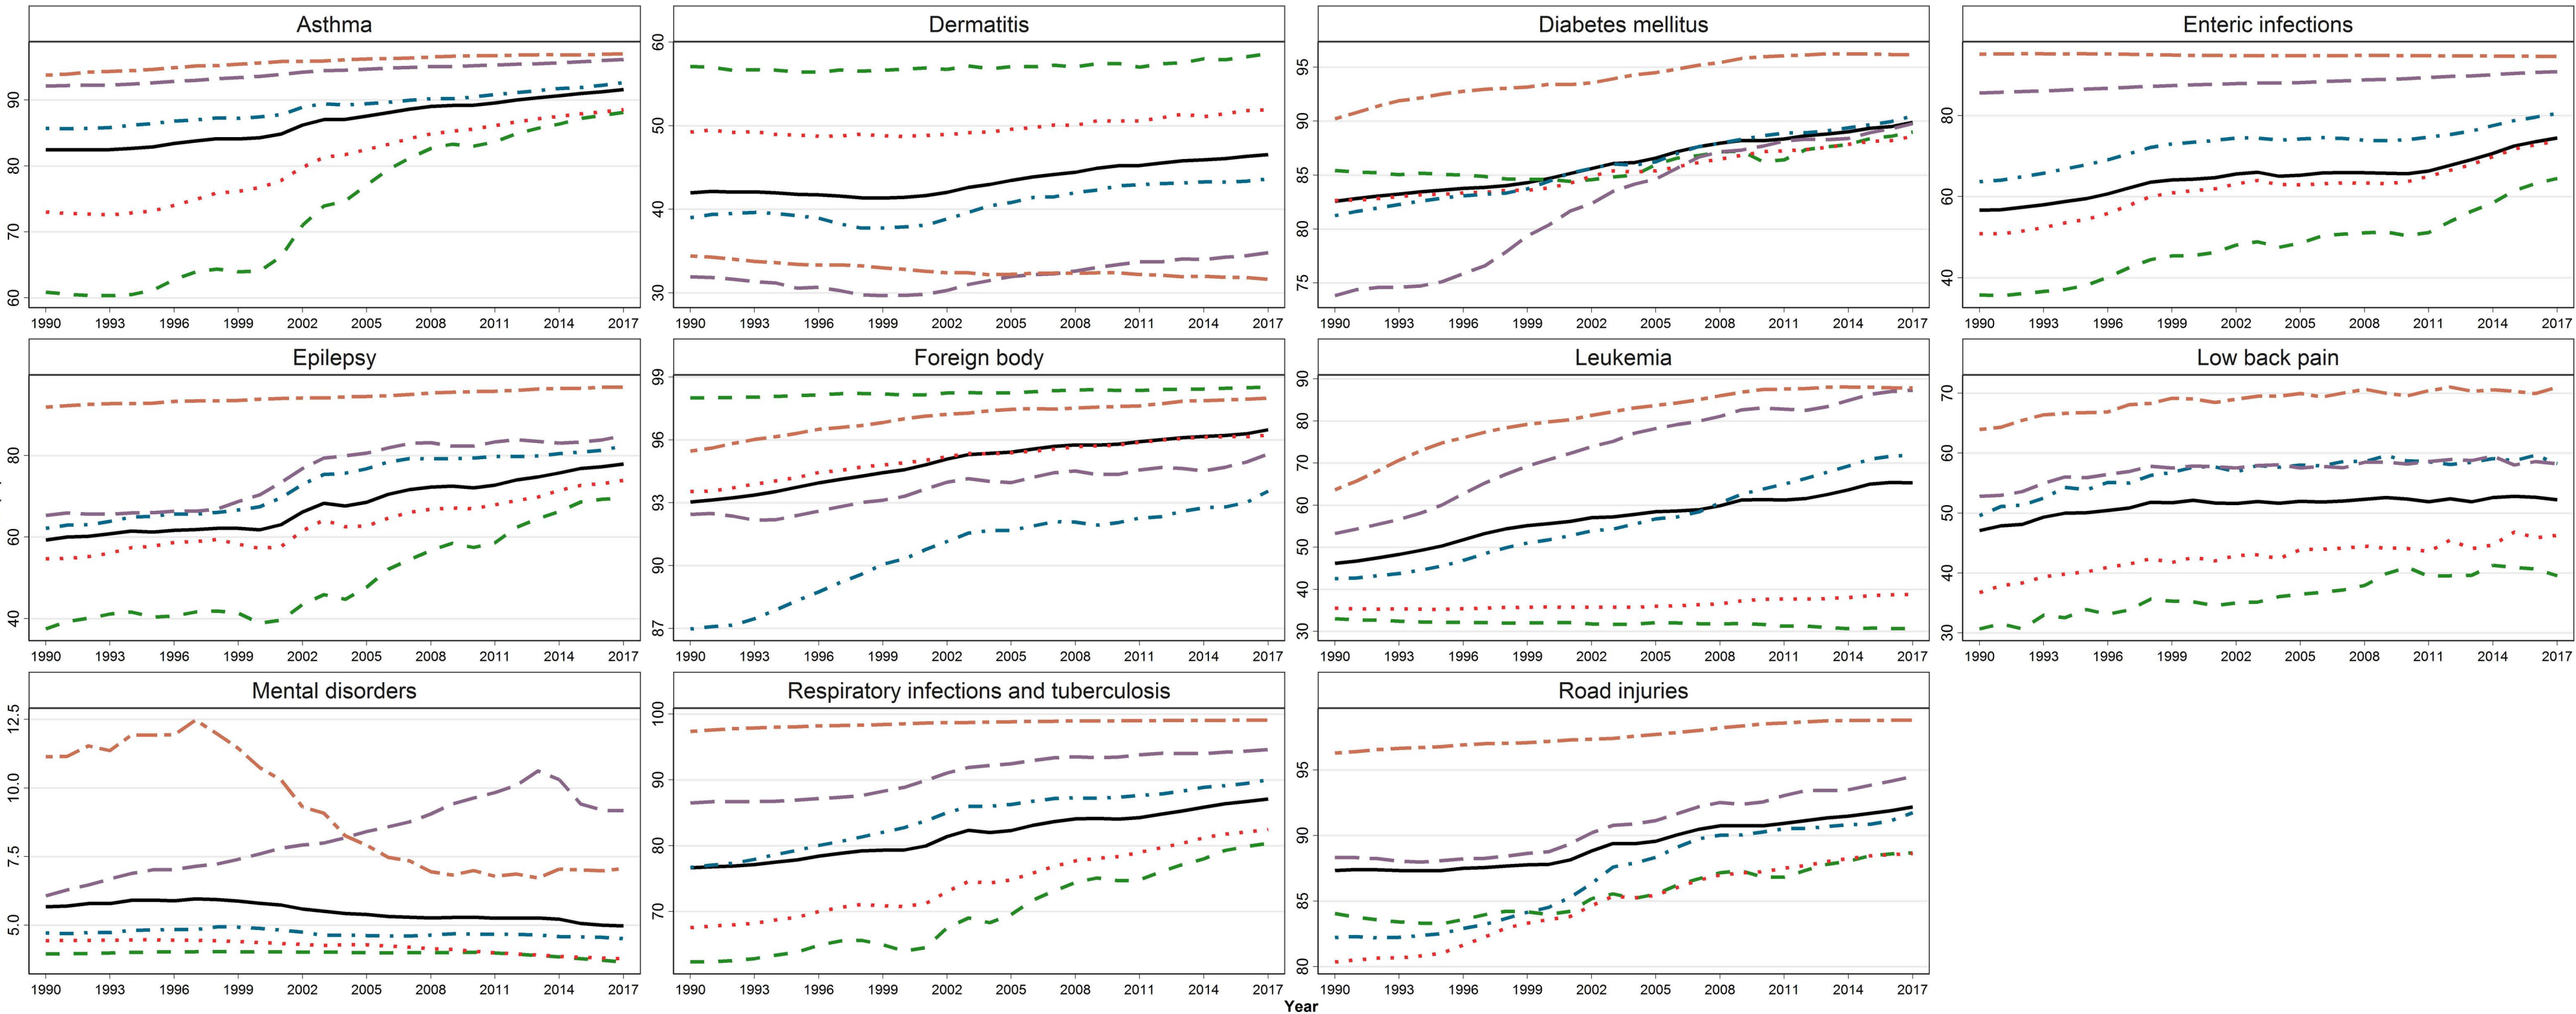

— Global — Low SDI ··· Low-middle SDI -·- Middle SDI - - - High-middle SDI - - - High SDI



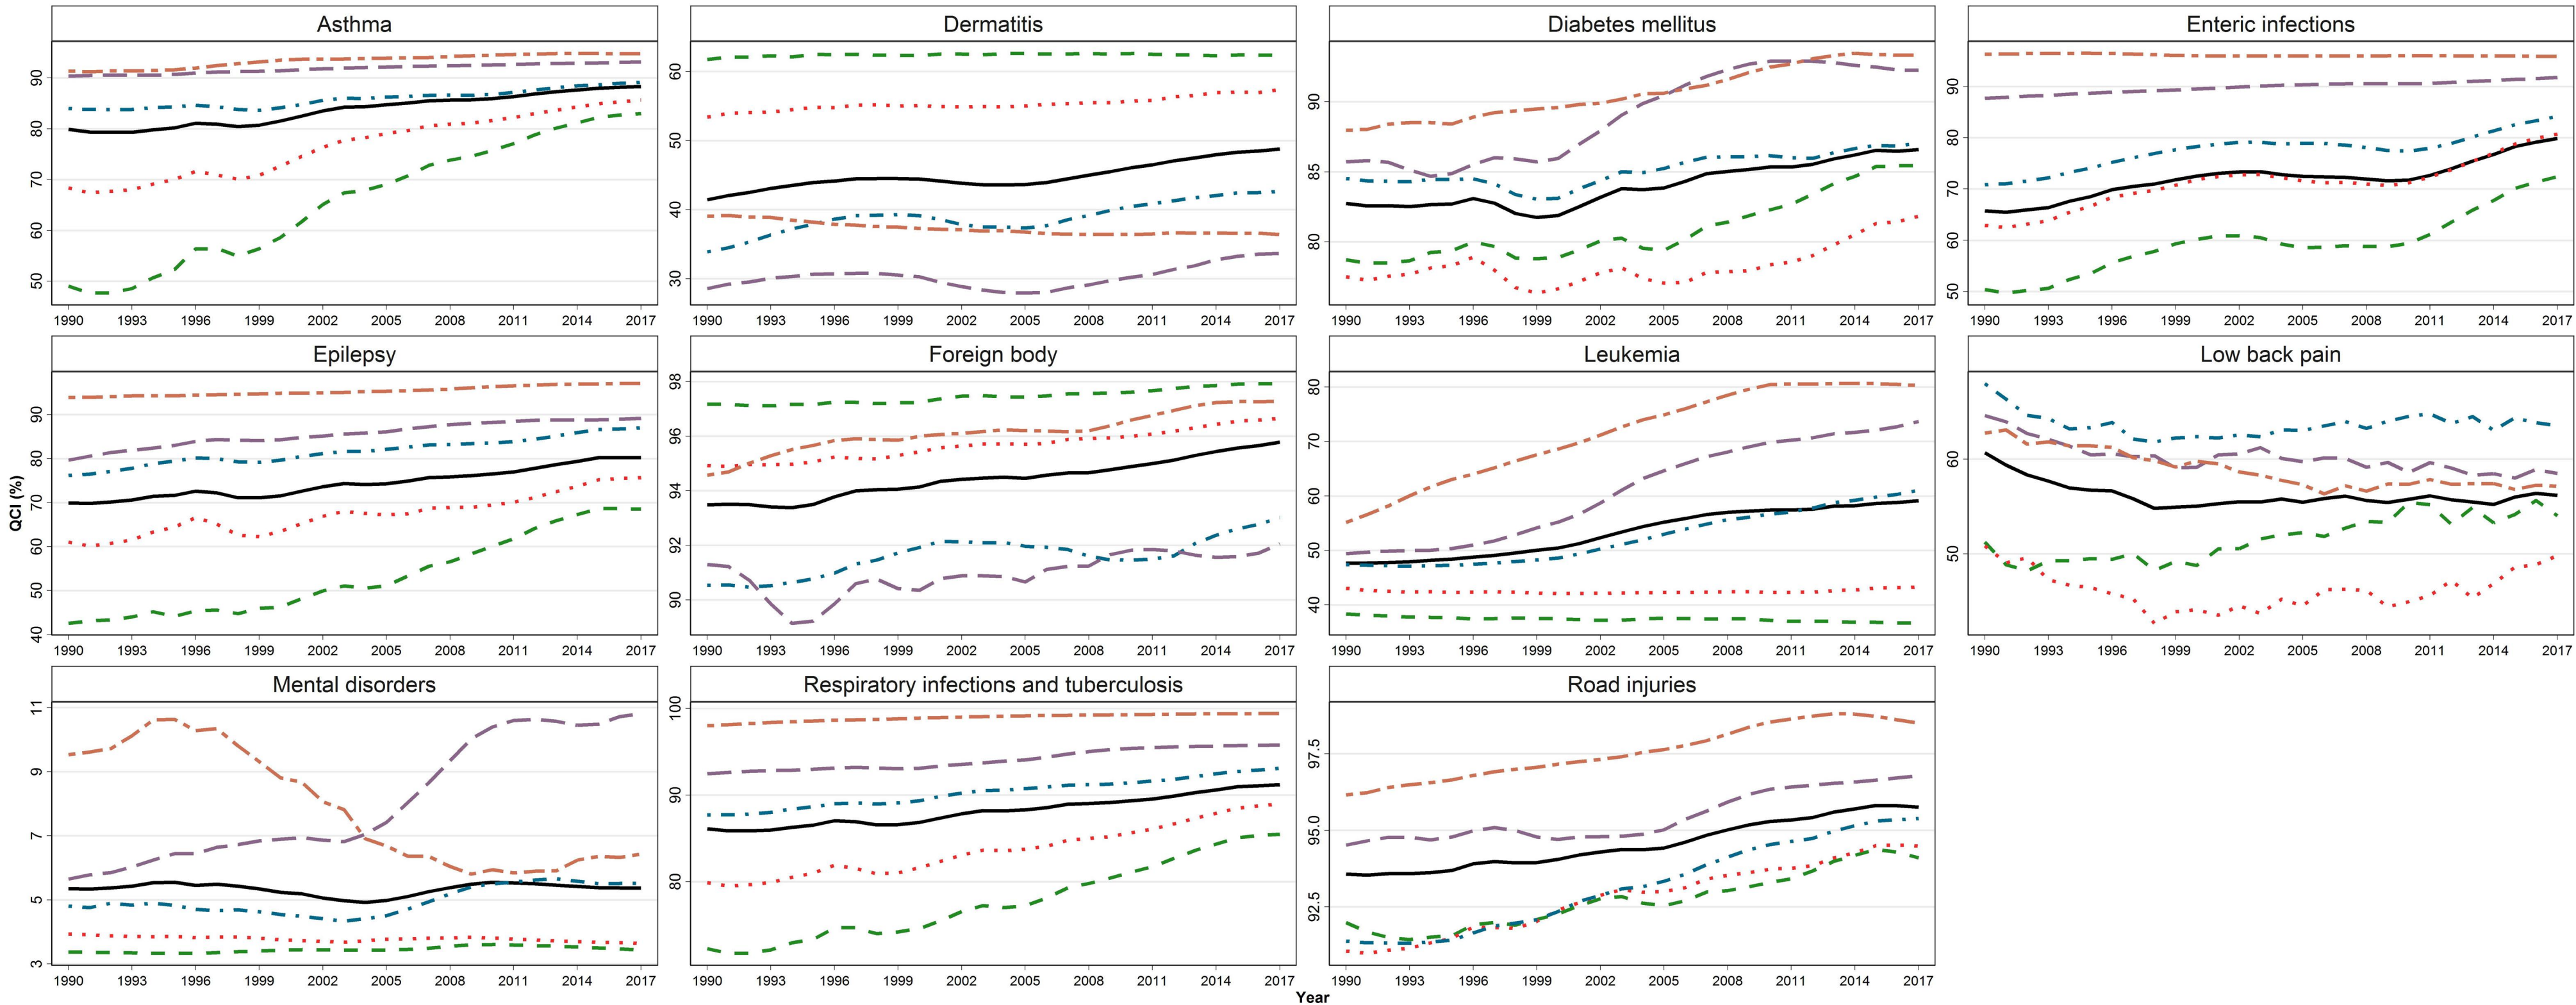

— Global — Low SDI ··· Low-middle SDI -·- Middle SDI - - - High-middle SDI - - - High SDI







Post Neonatal

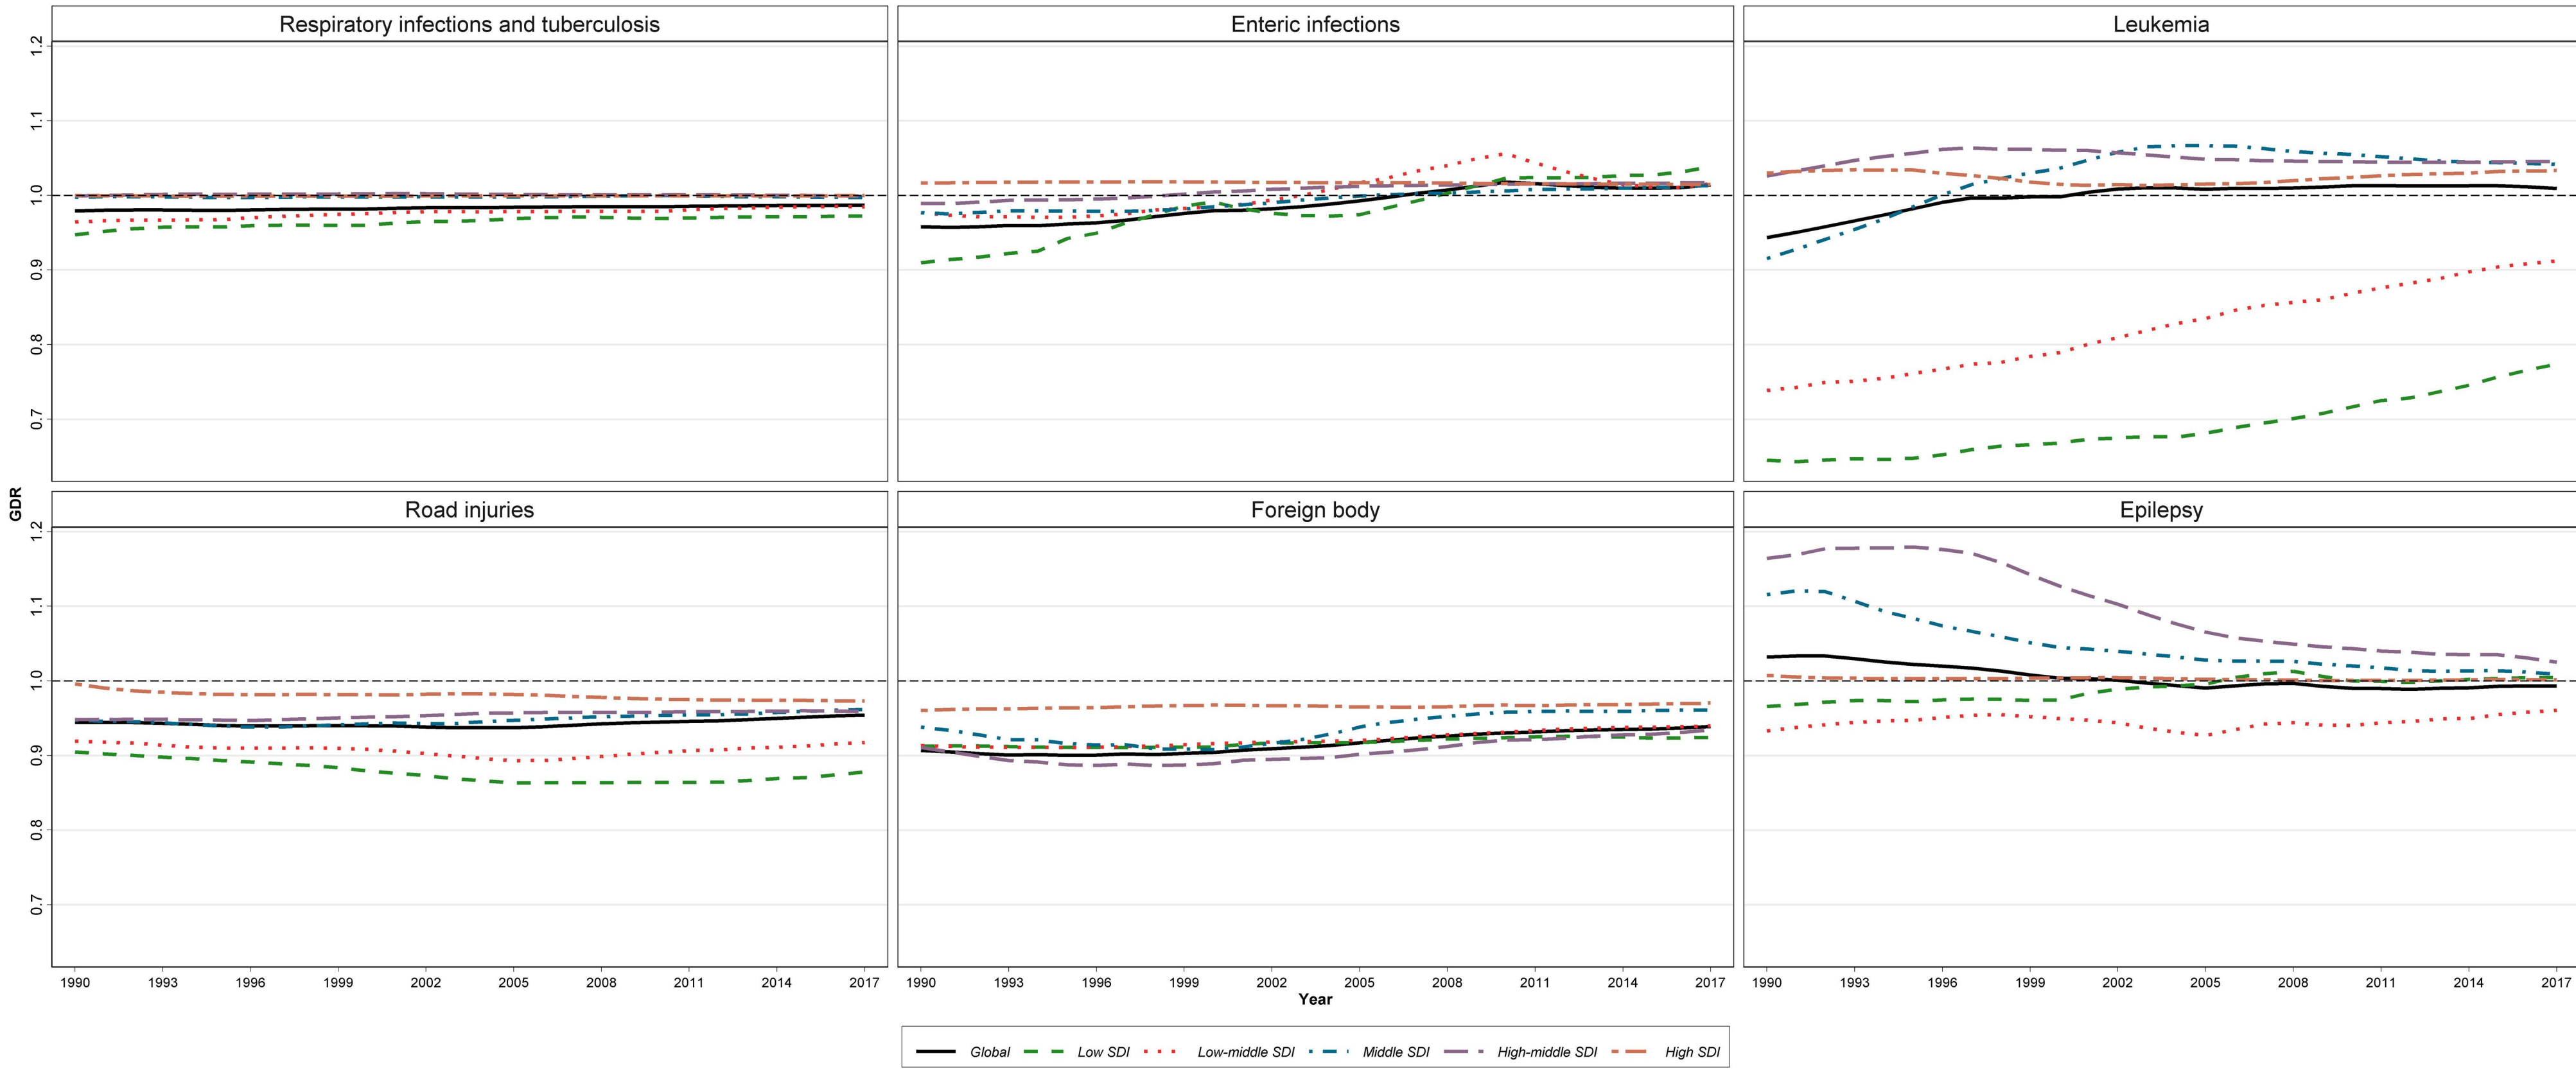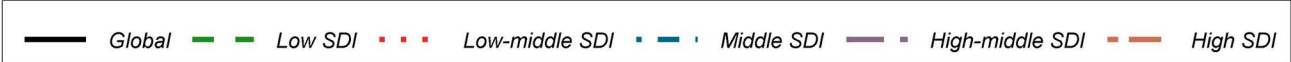



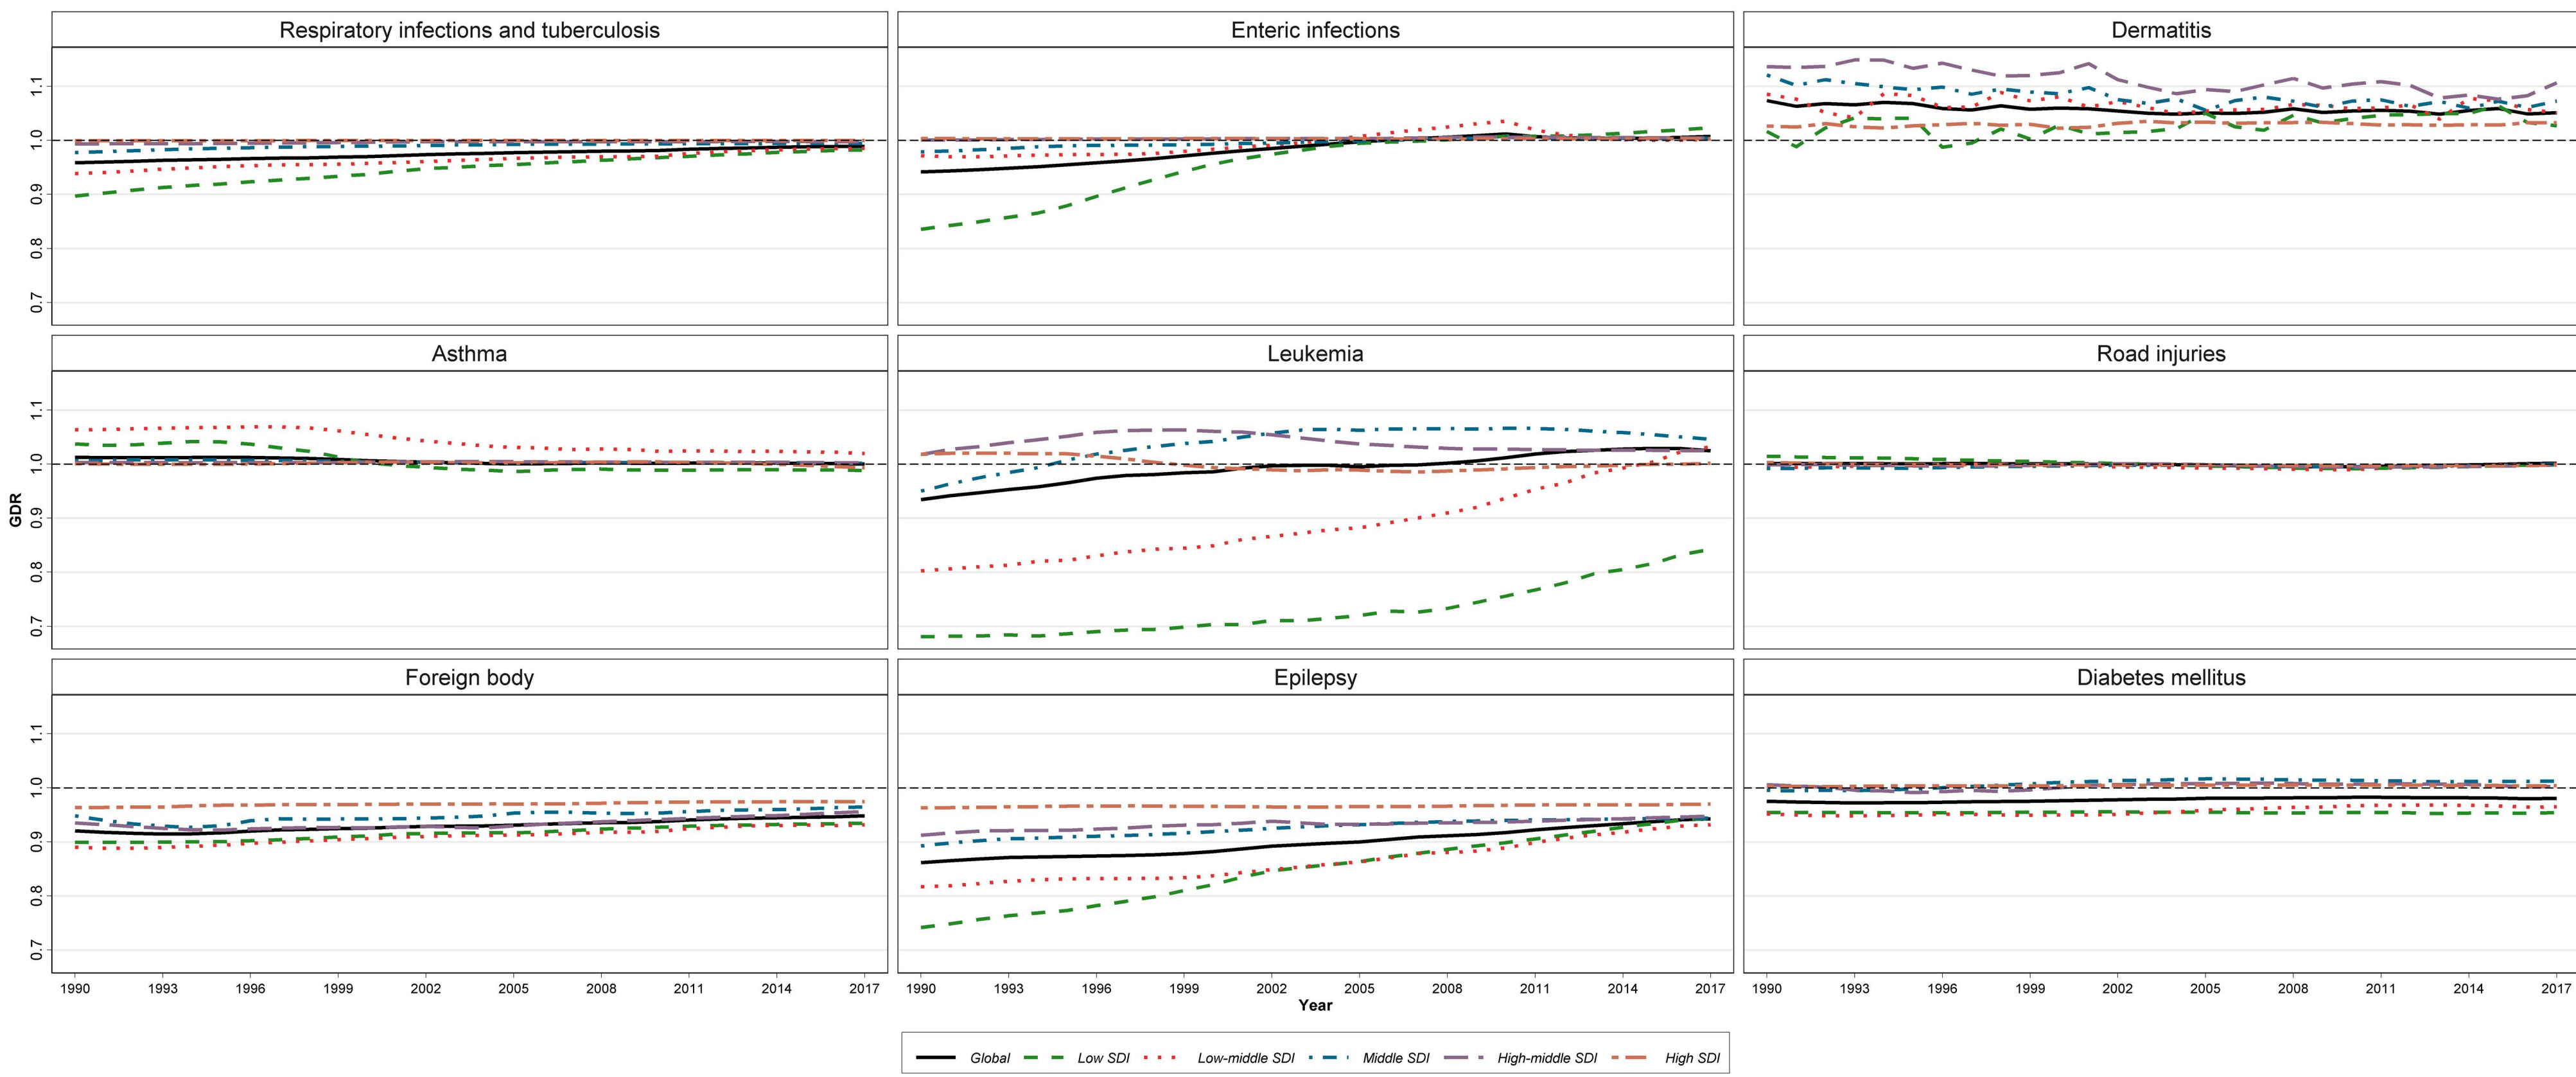

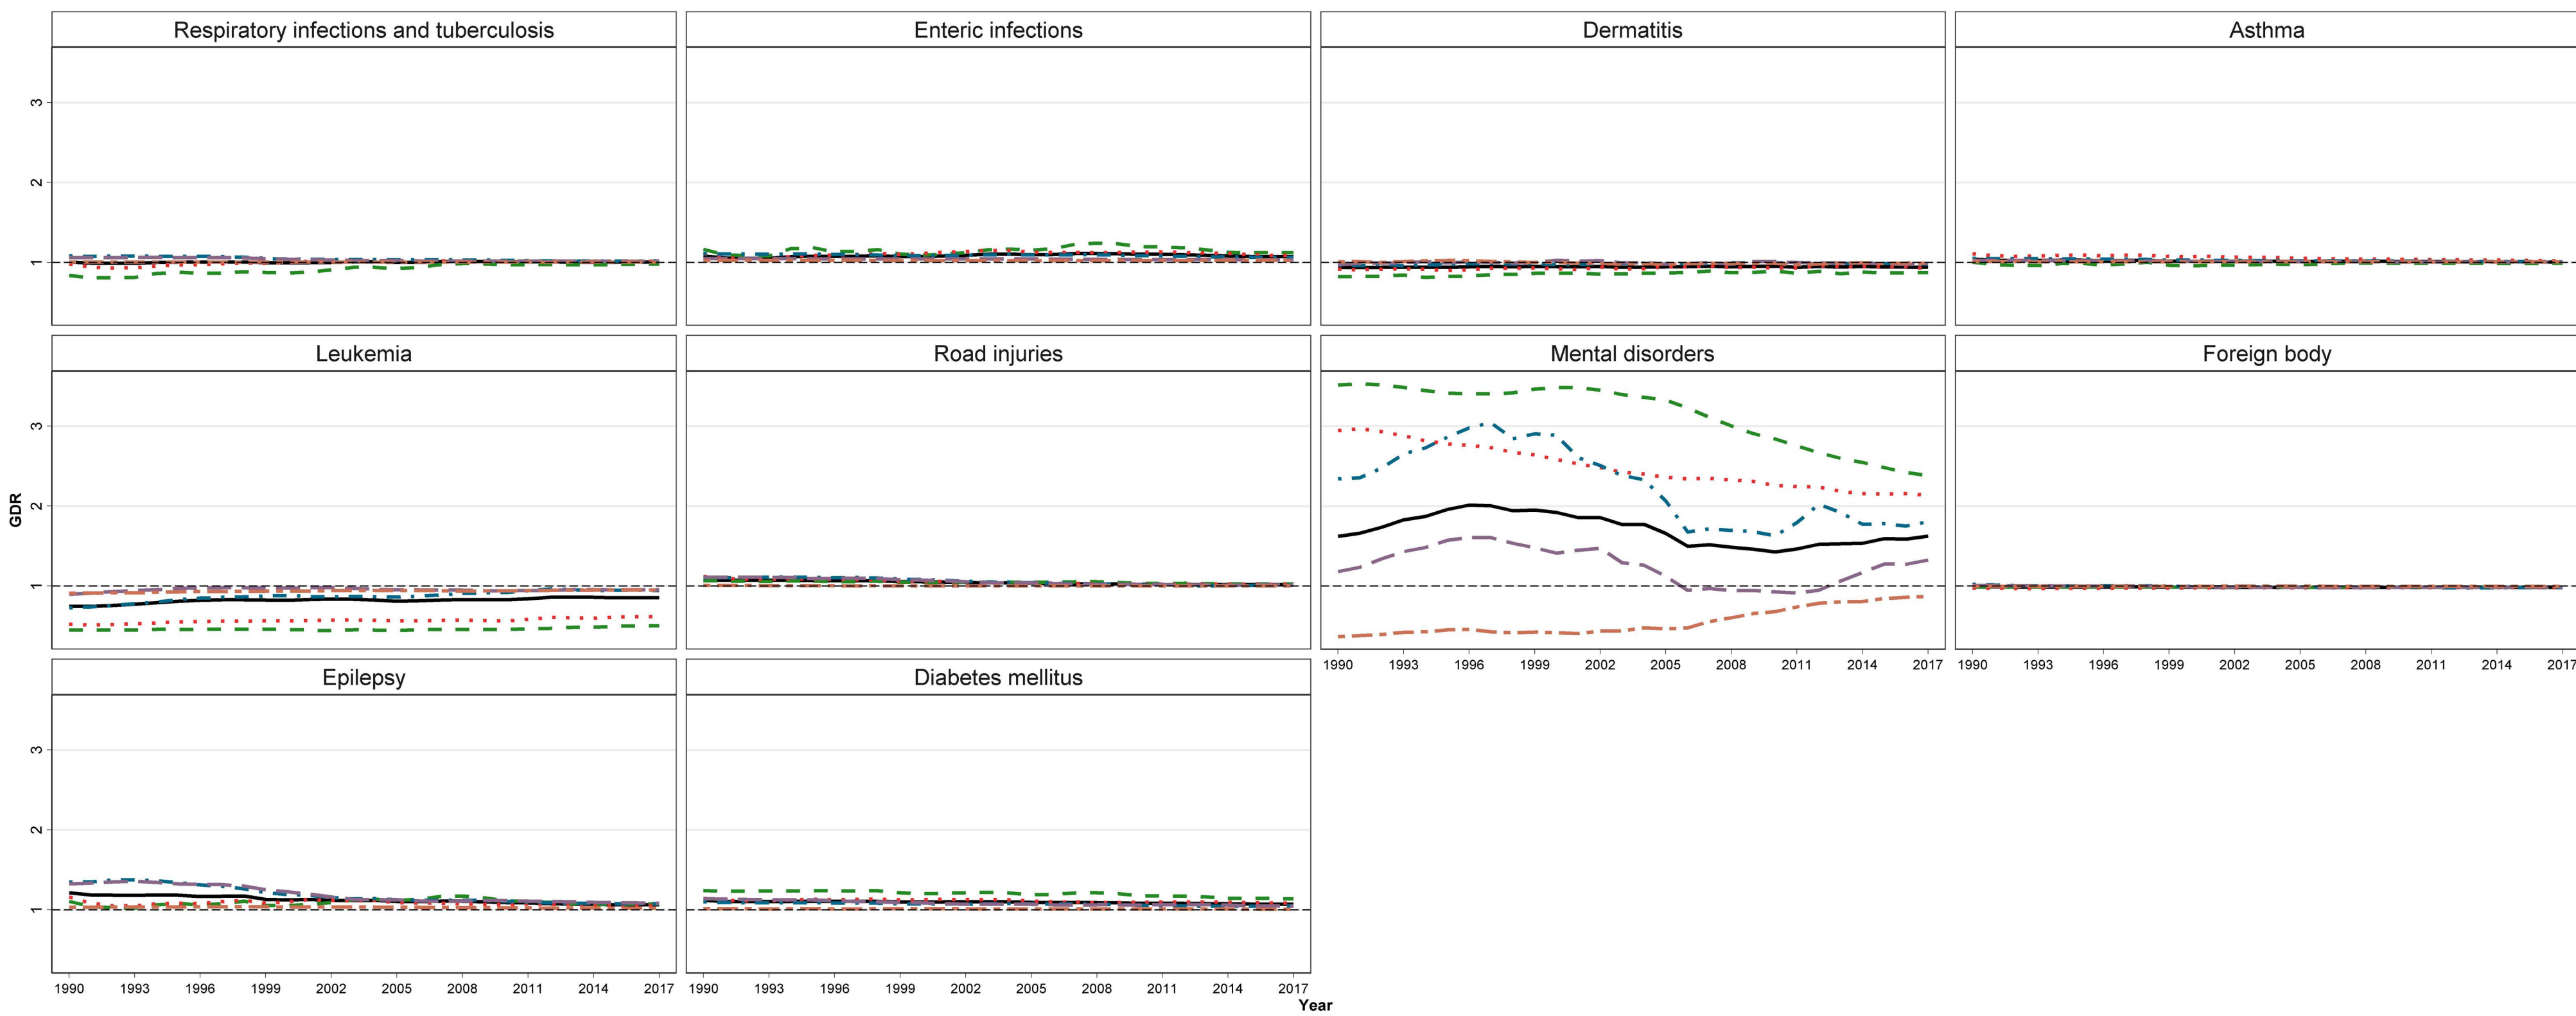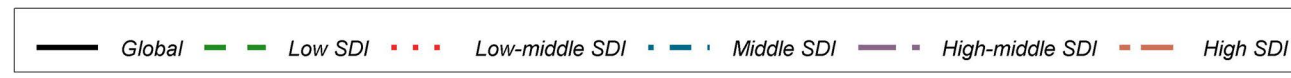



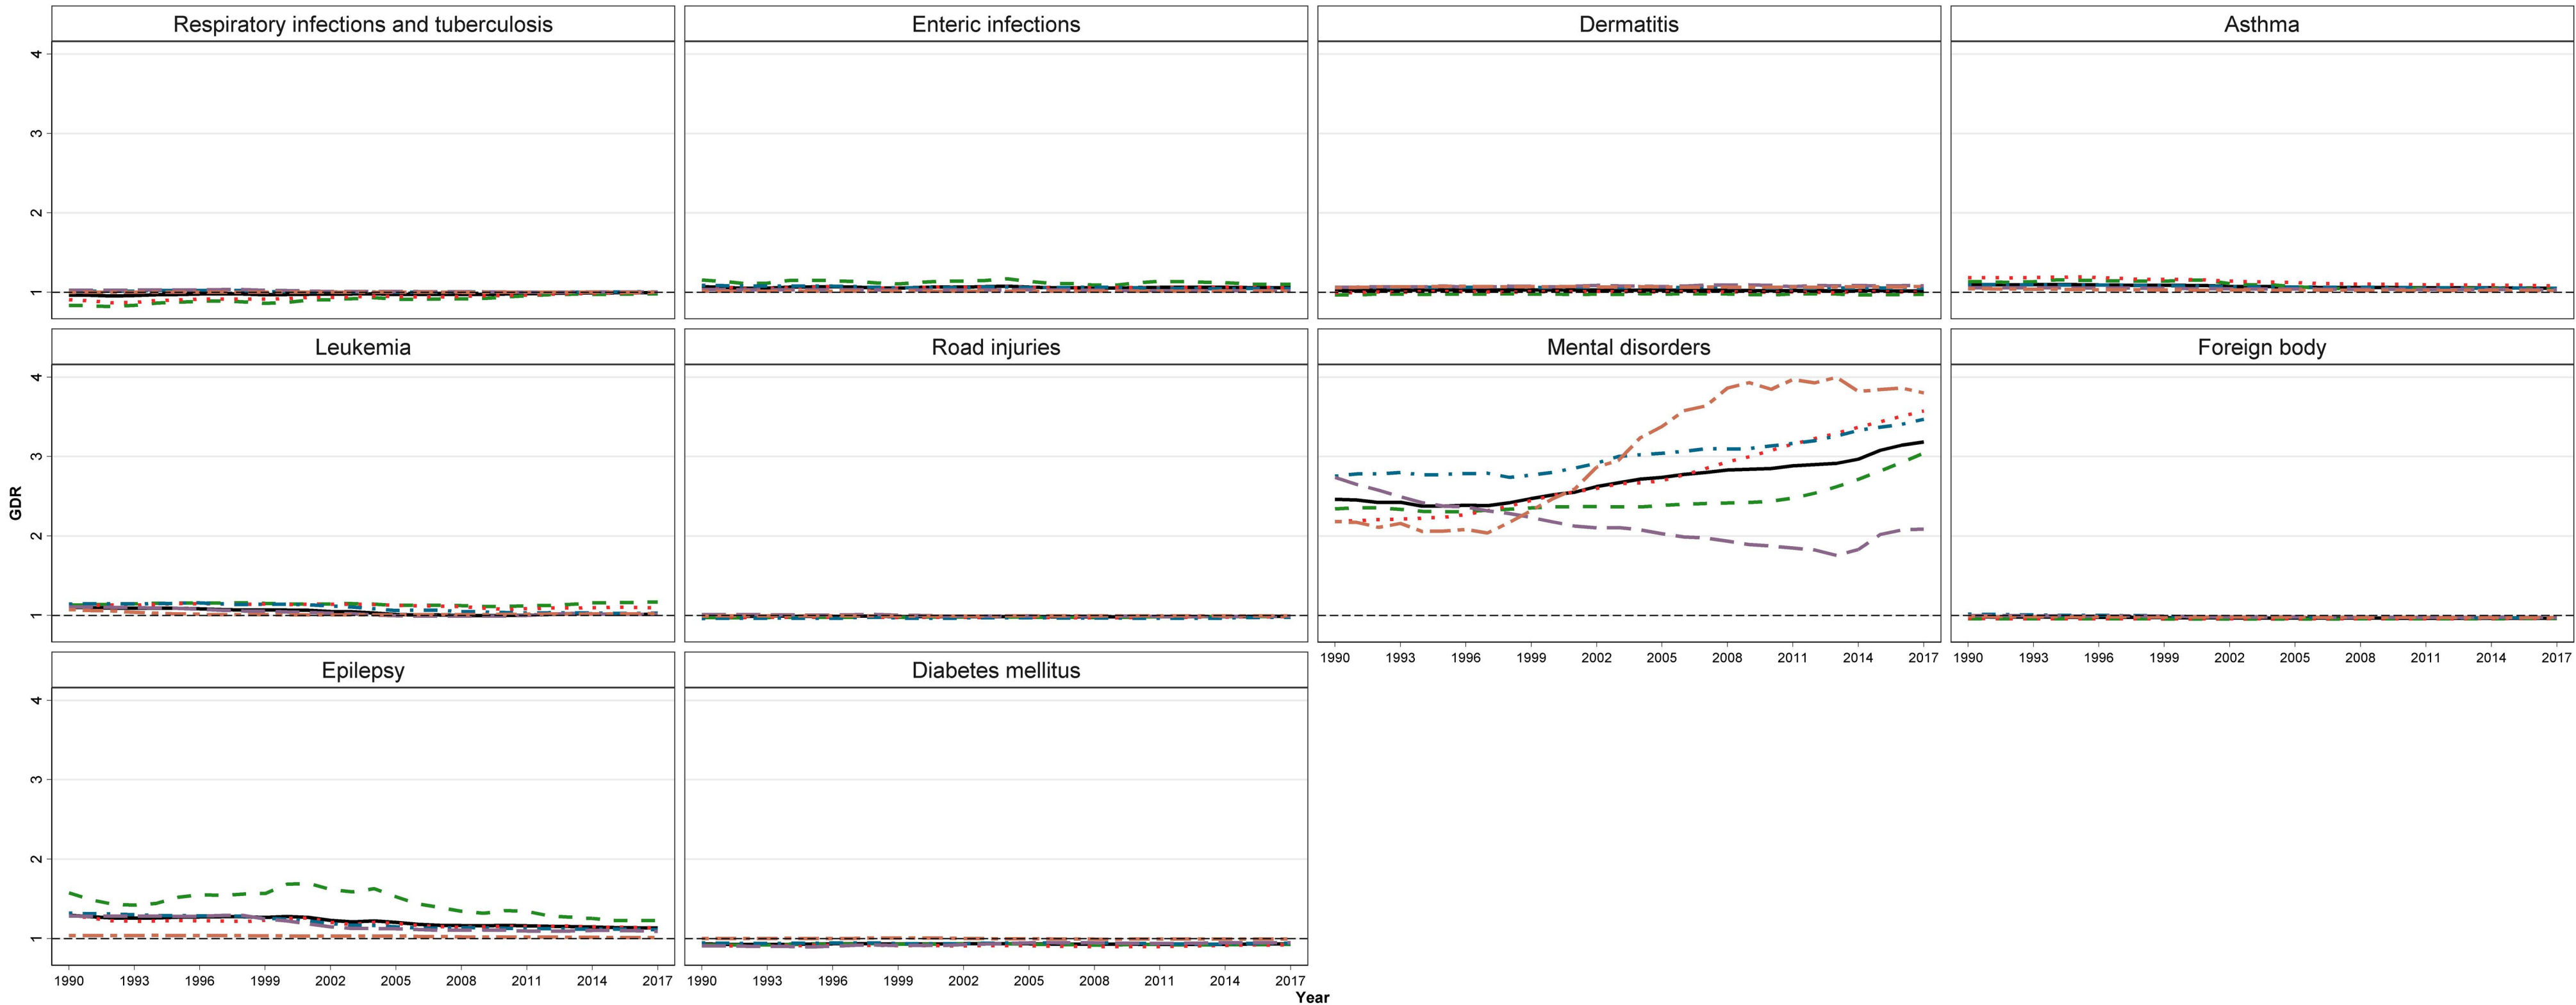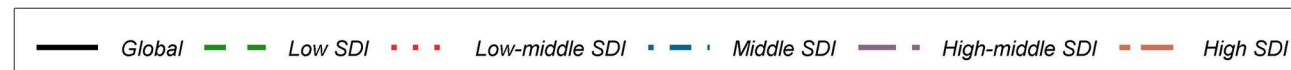

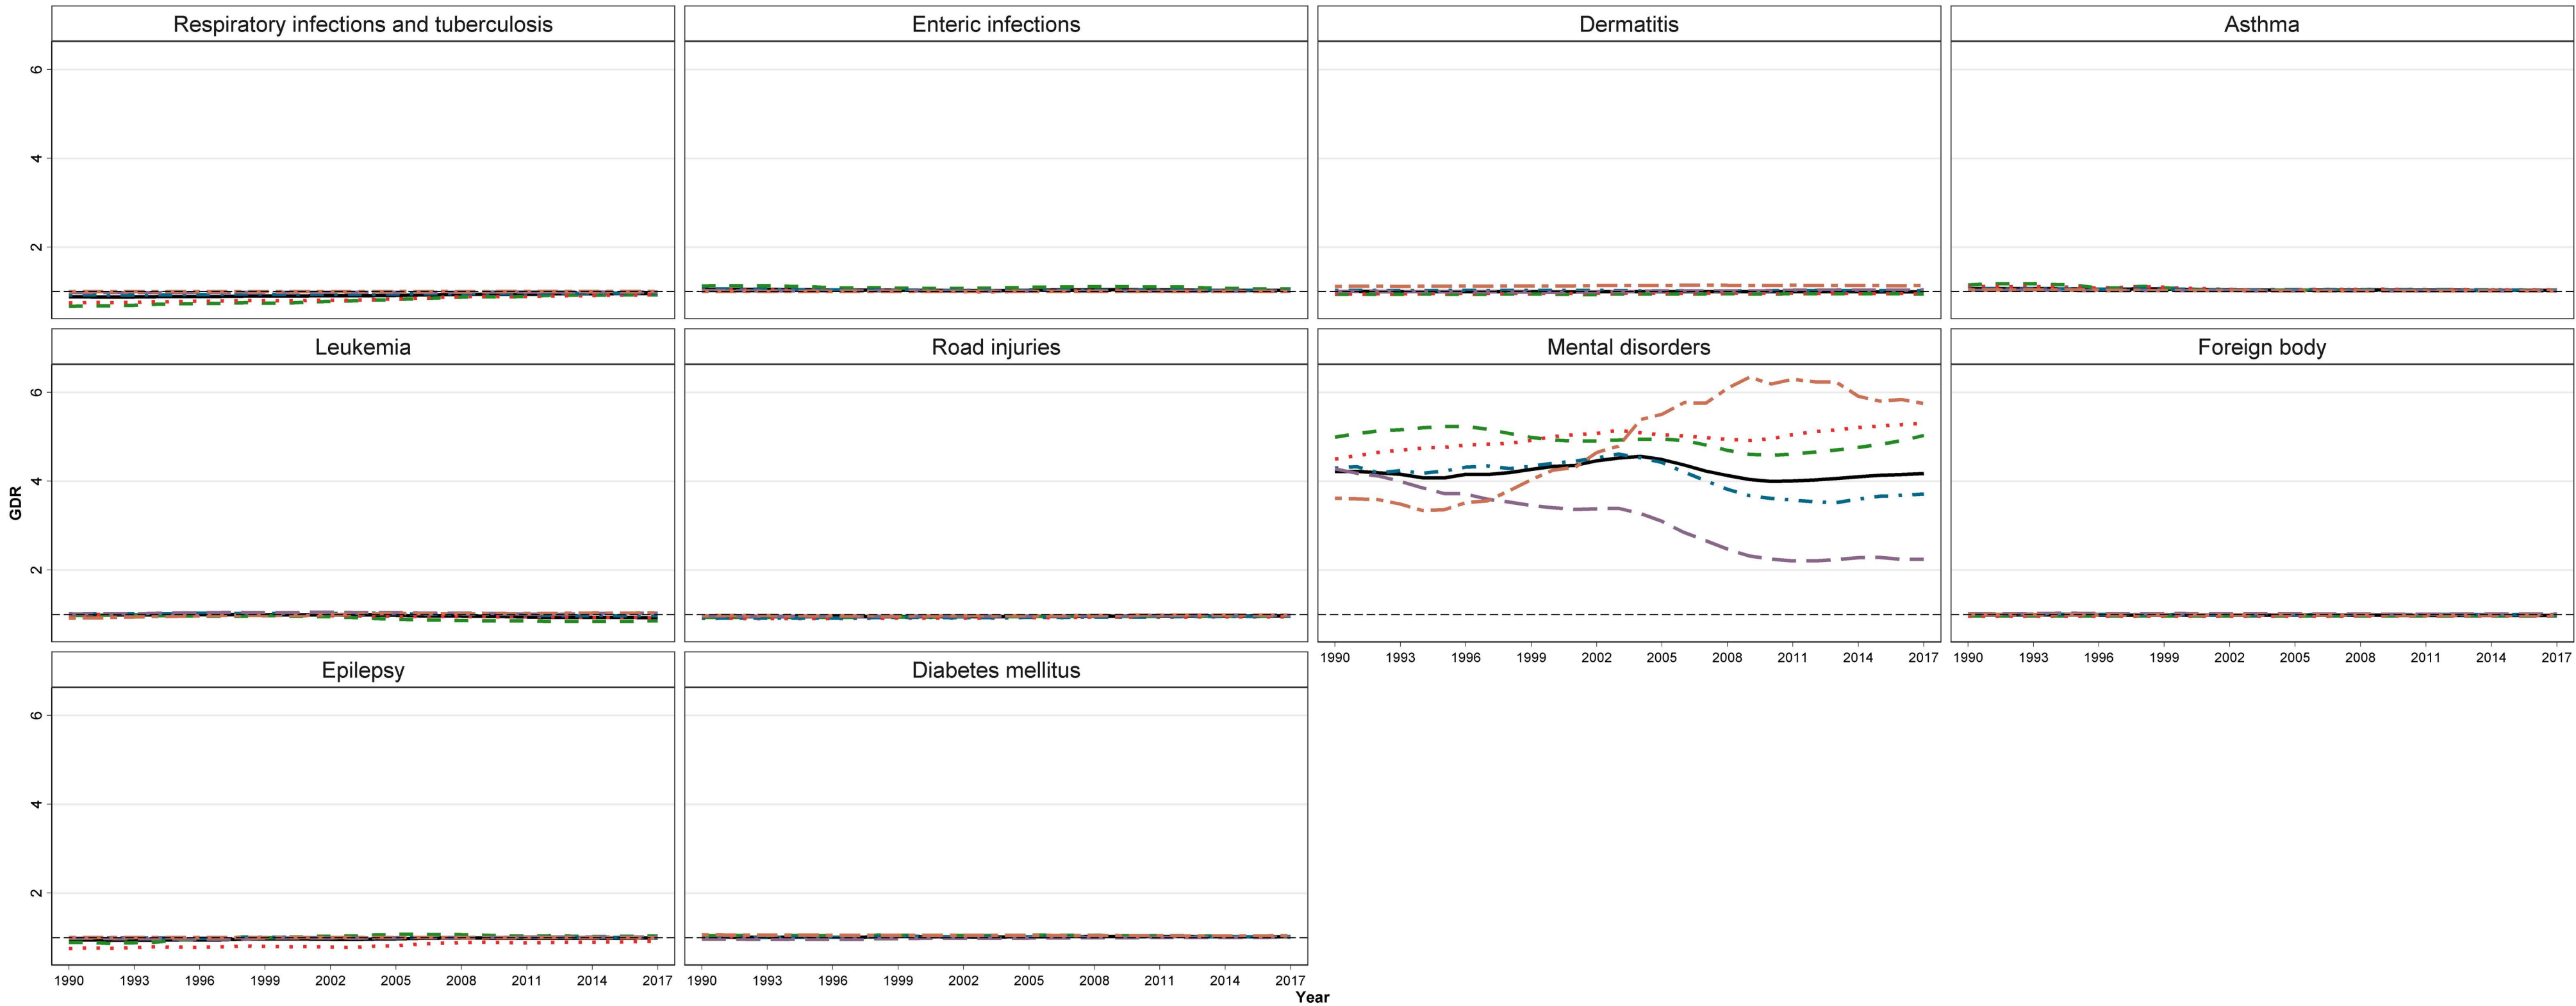



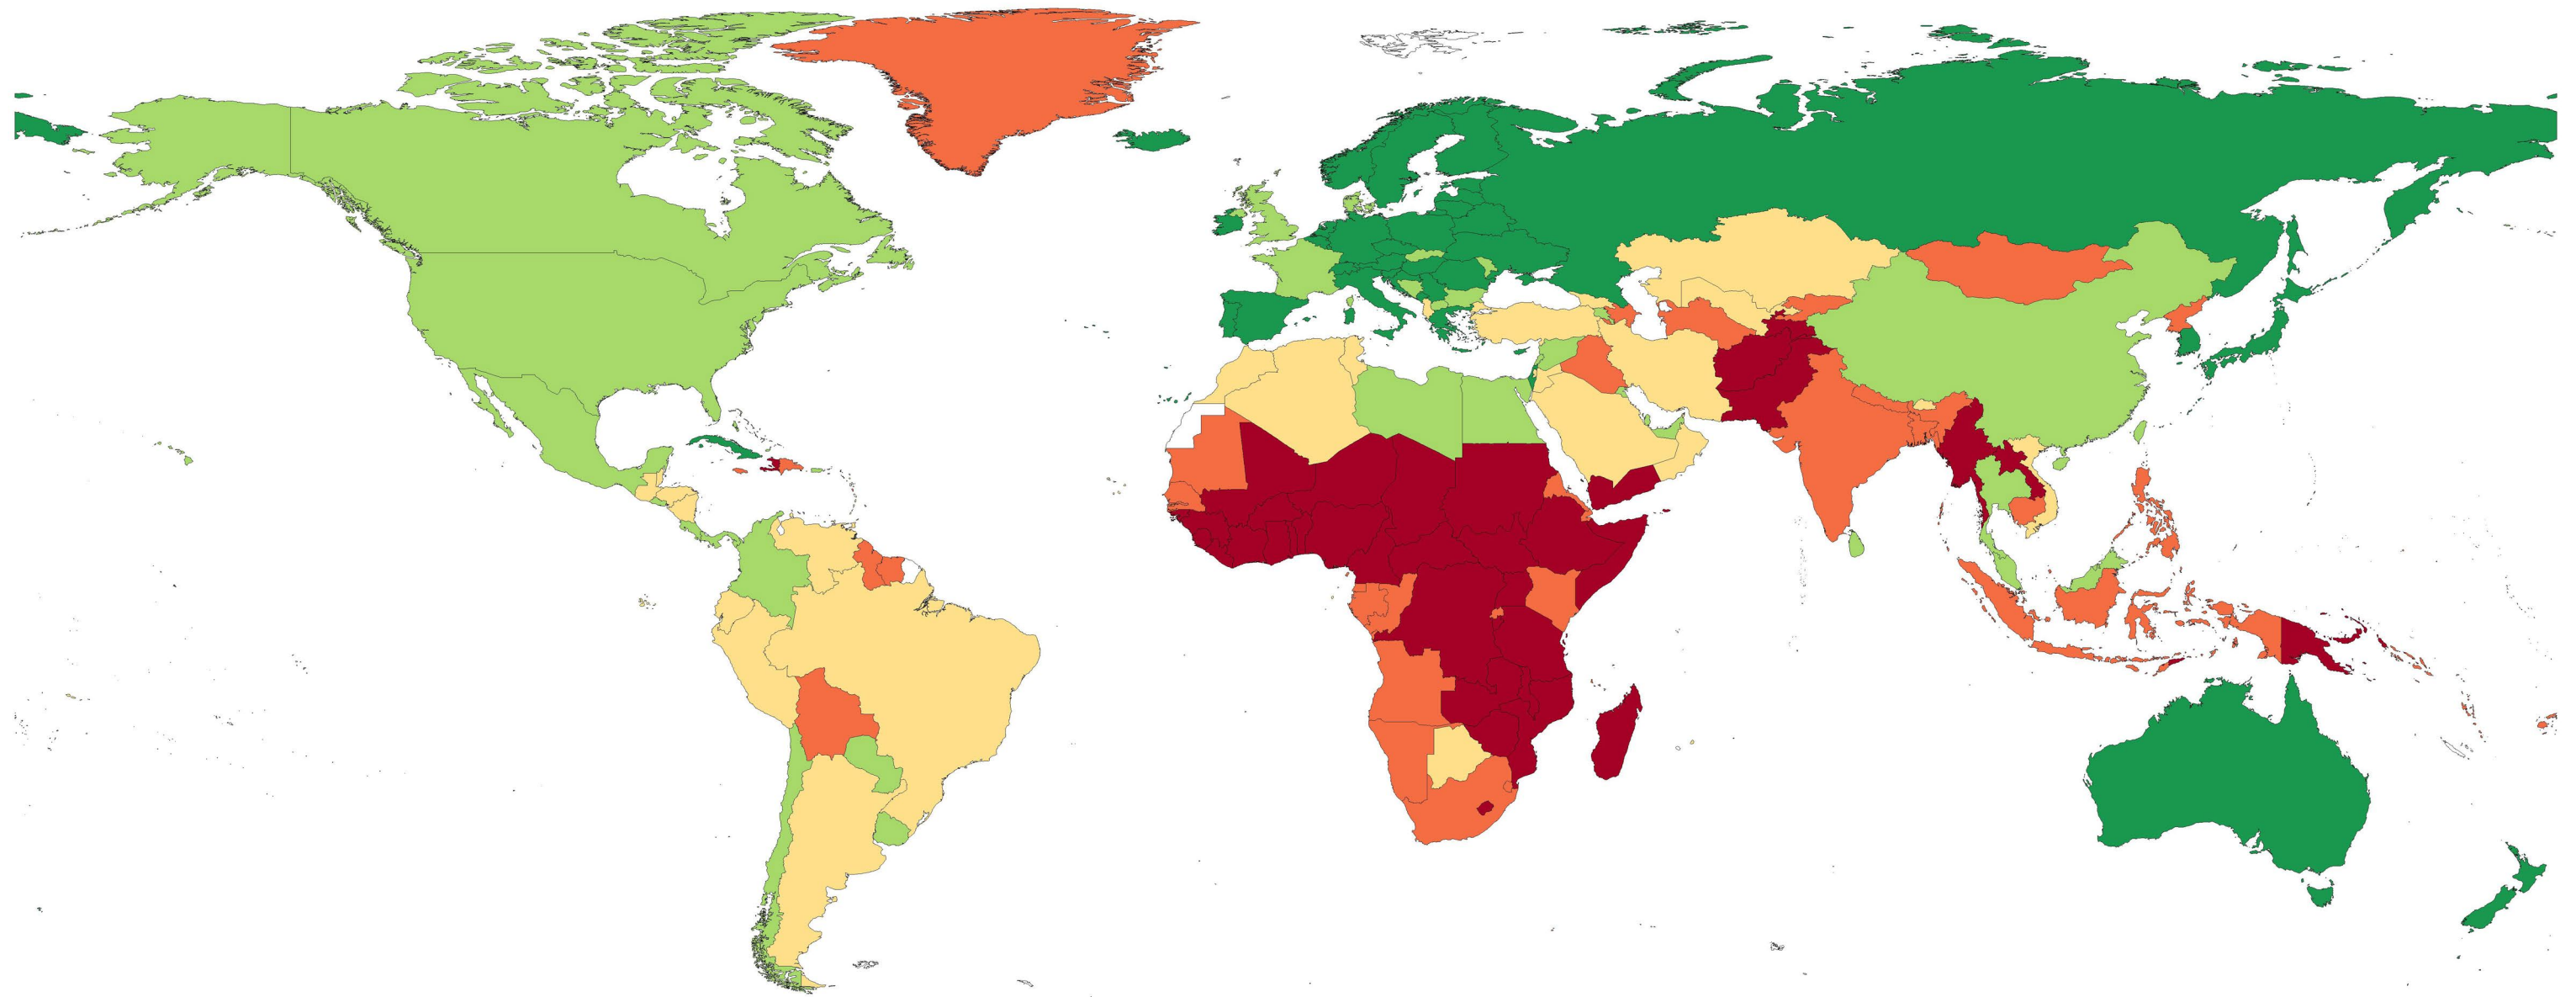

Neonatal disorders, QCI (%)

■ < 87.6   ■ [87.6 to 93.2)   ■ [93.2 to 96.7)   ■ [96.7 to 98.5)   ■ ≥ 98.5

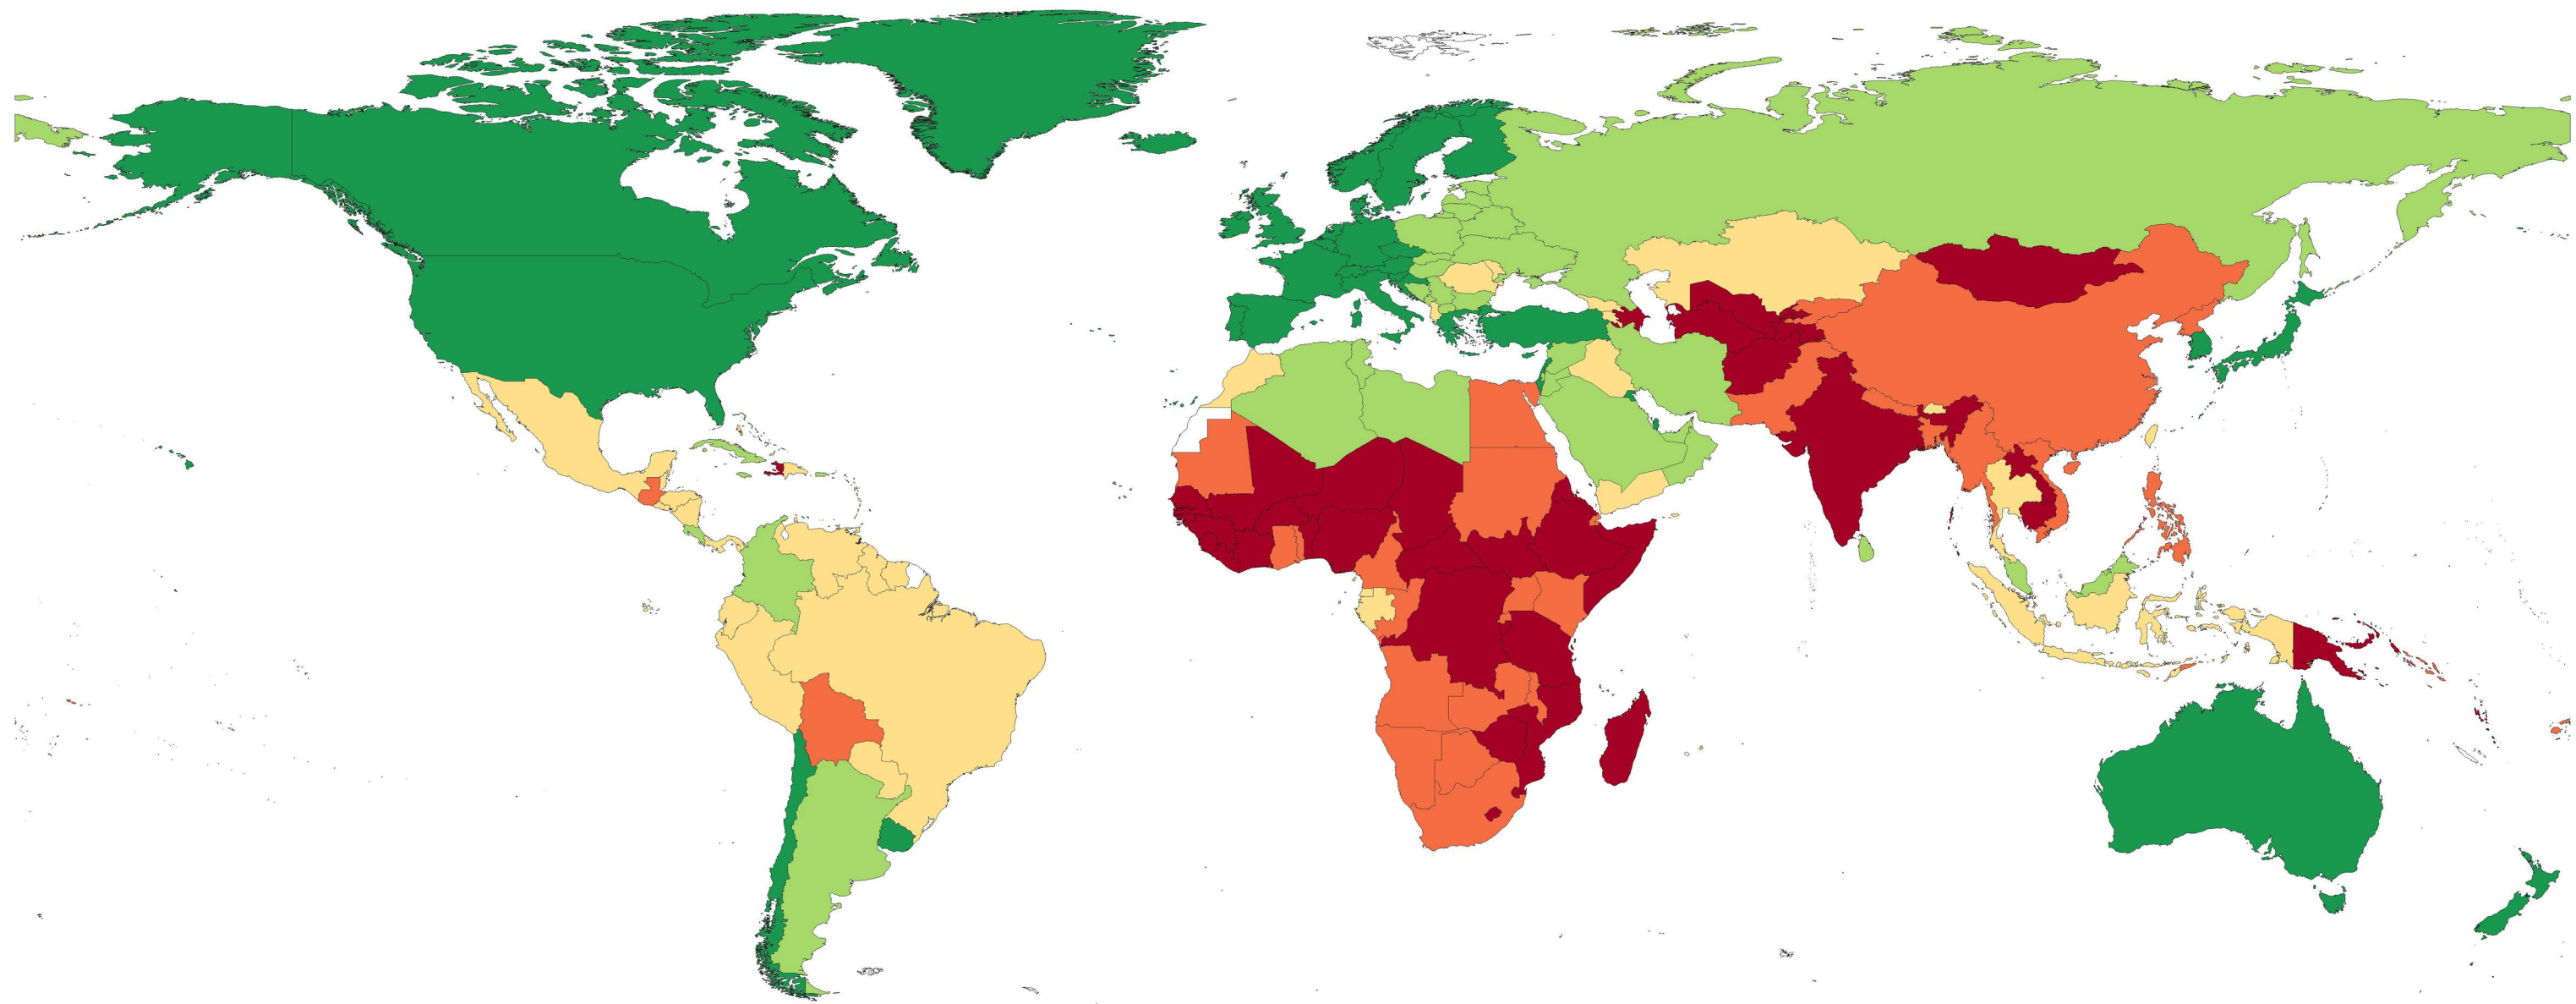

Respiratory infections and tuberculosis, QCI (%)

■ < 85.8    ■ [85.8 to 92.9)    ■ [92.9 to 95.6)    ■ [95.6 to 97.7)    ■ ≥ 97.7



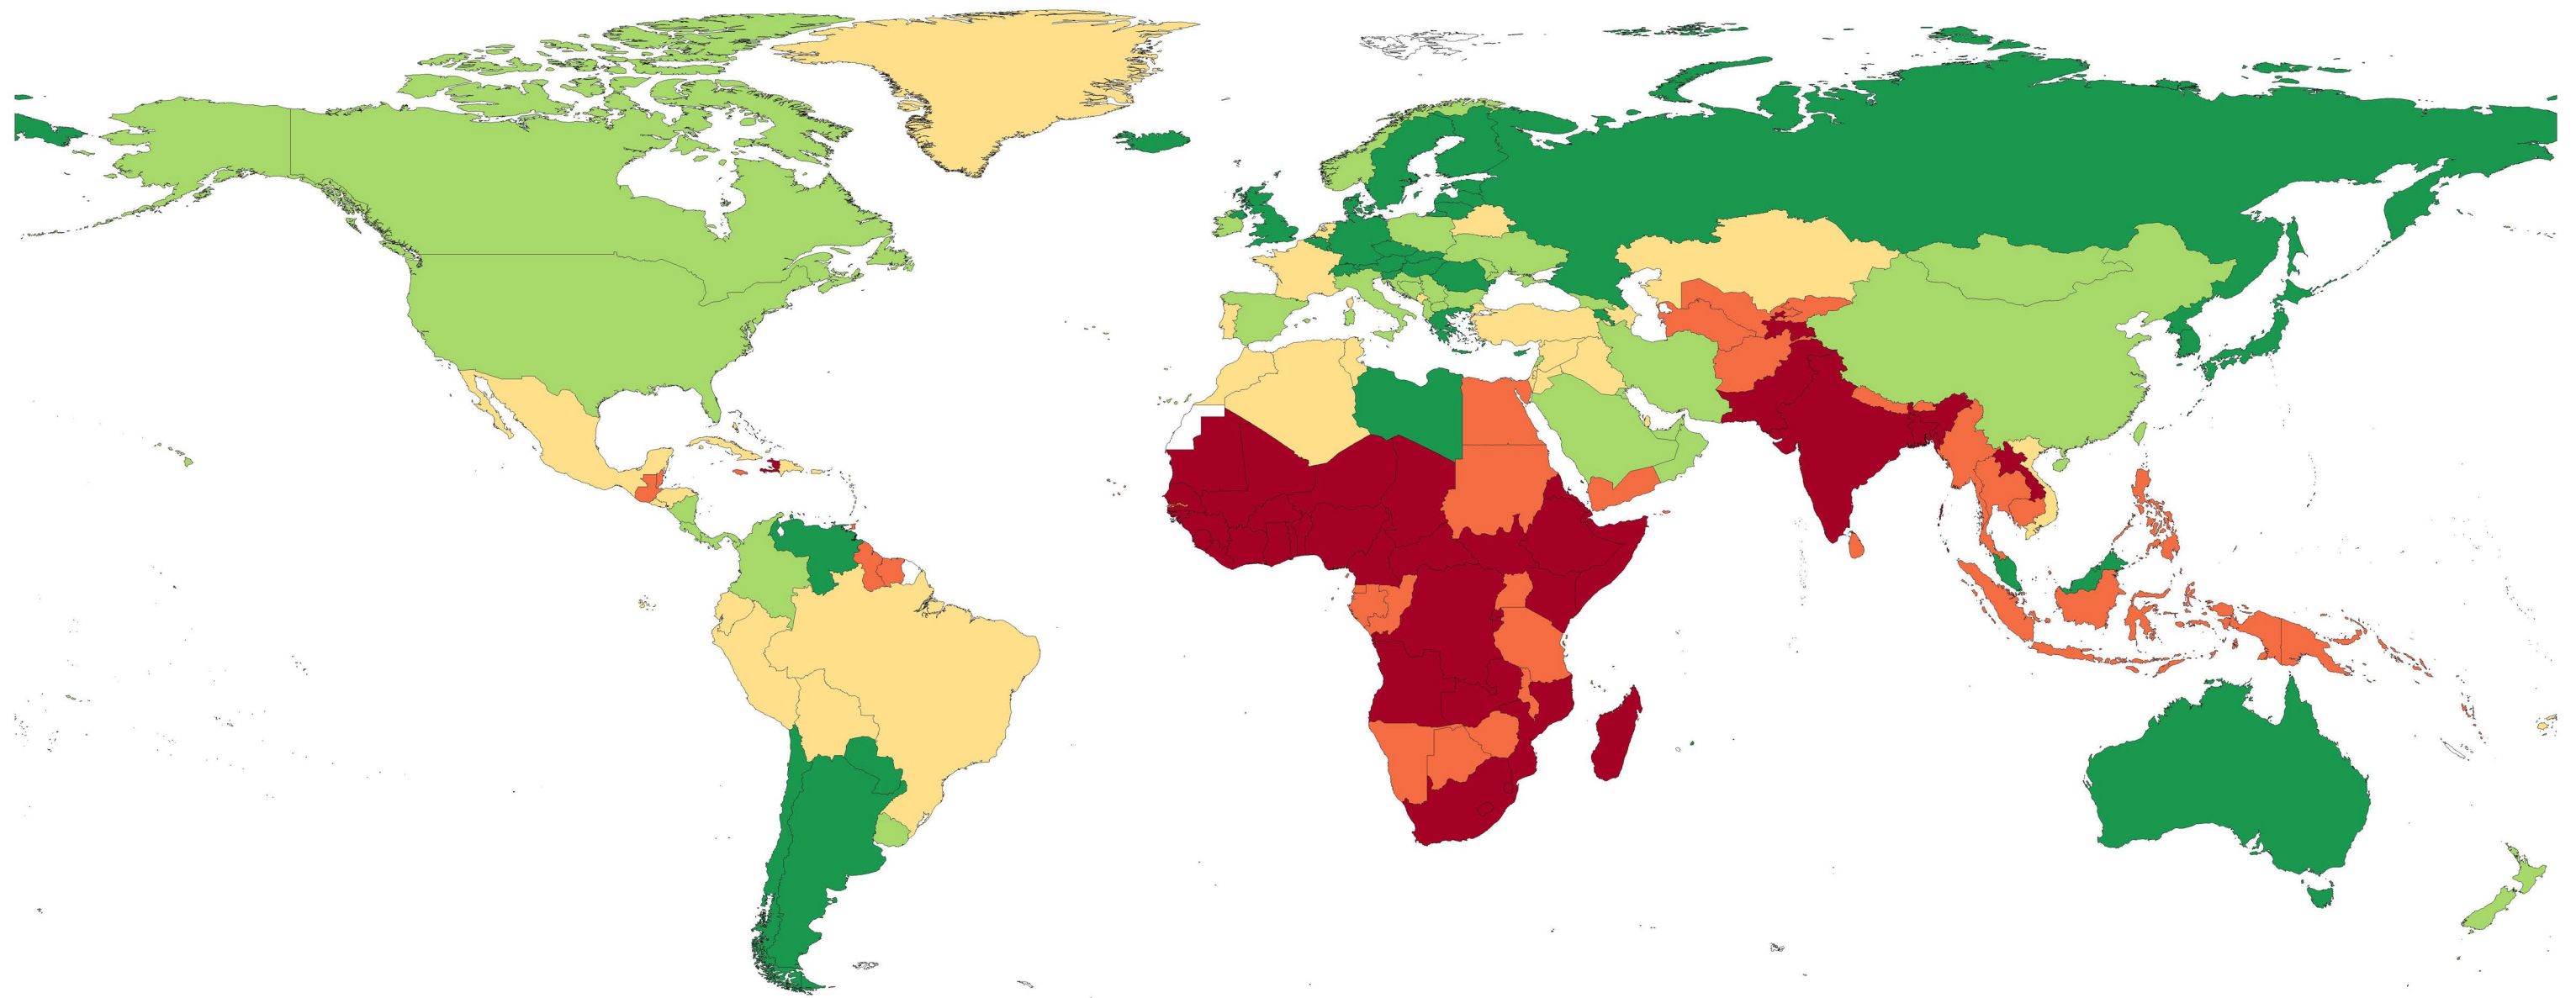

Enteric infections, QCI (%)

■ < 85.5    ■ [85.5 to 94.4)    ■ [94.4 to 95.9)    ■ [95.9 to 97.0)    ■ ≥ 97.0

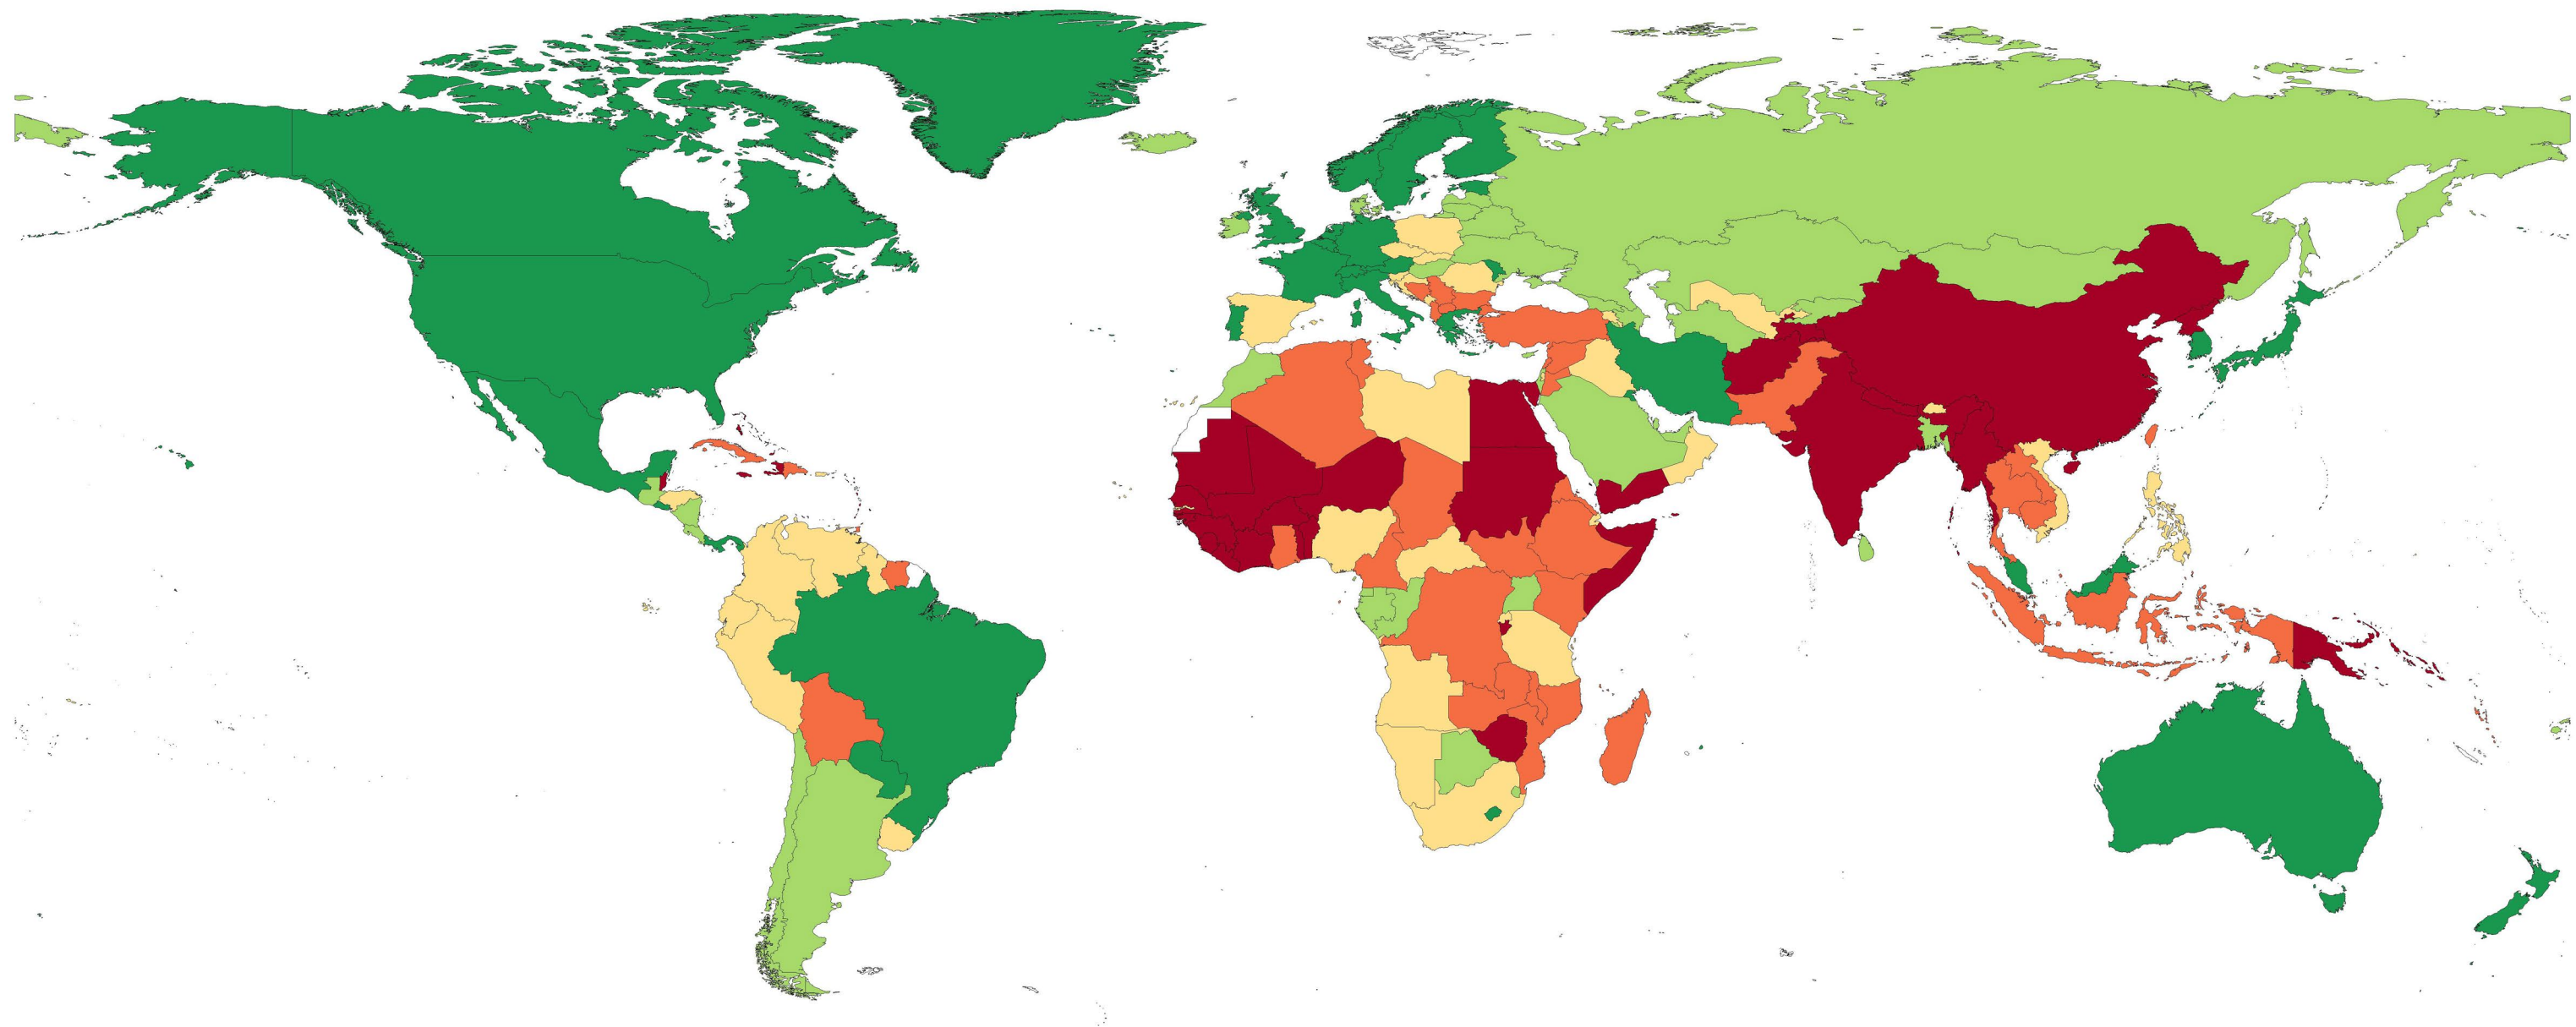

Mental disorders, QCI (%)

- < 21.4
- [21.4 to 24.1)
- [24.1 to 26.4)
- [26.4 to 29.5)
- ≥ 29.5



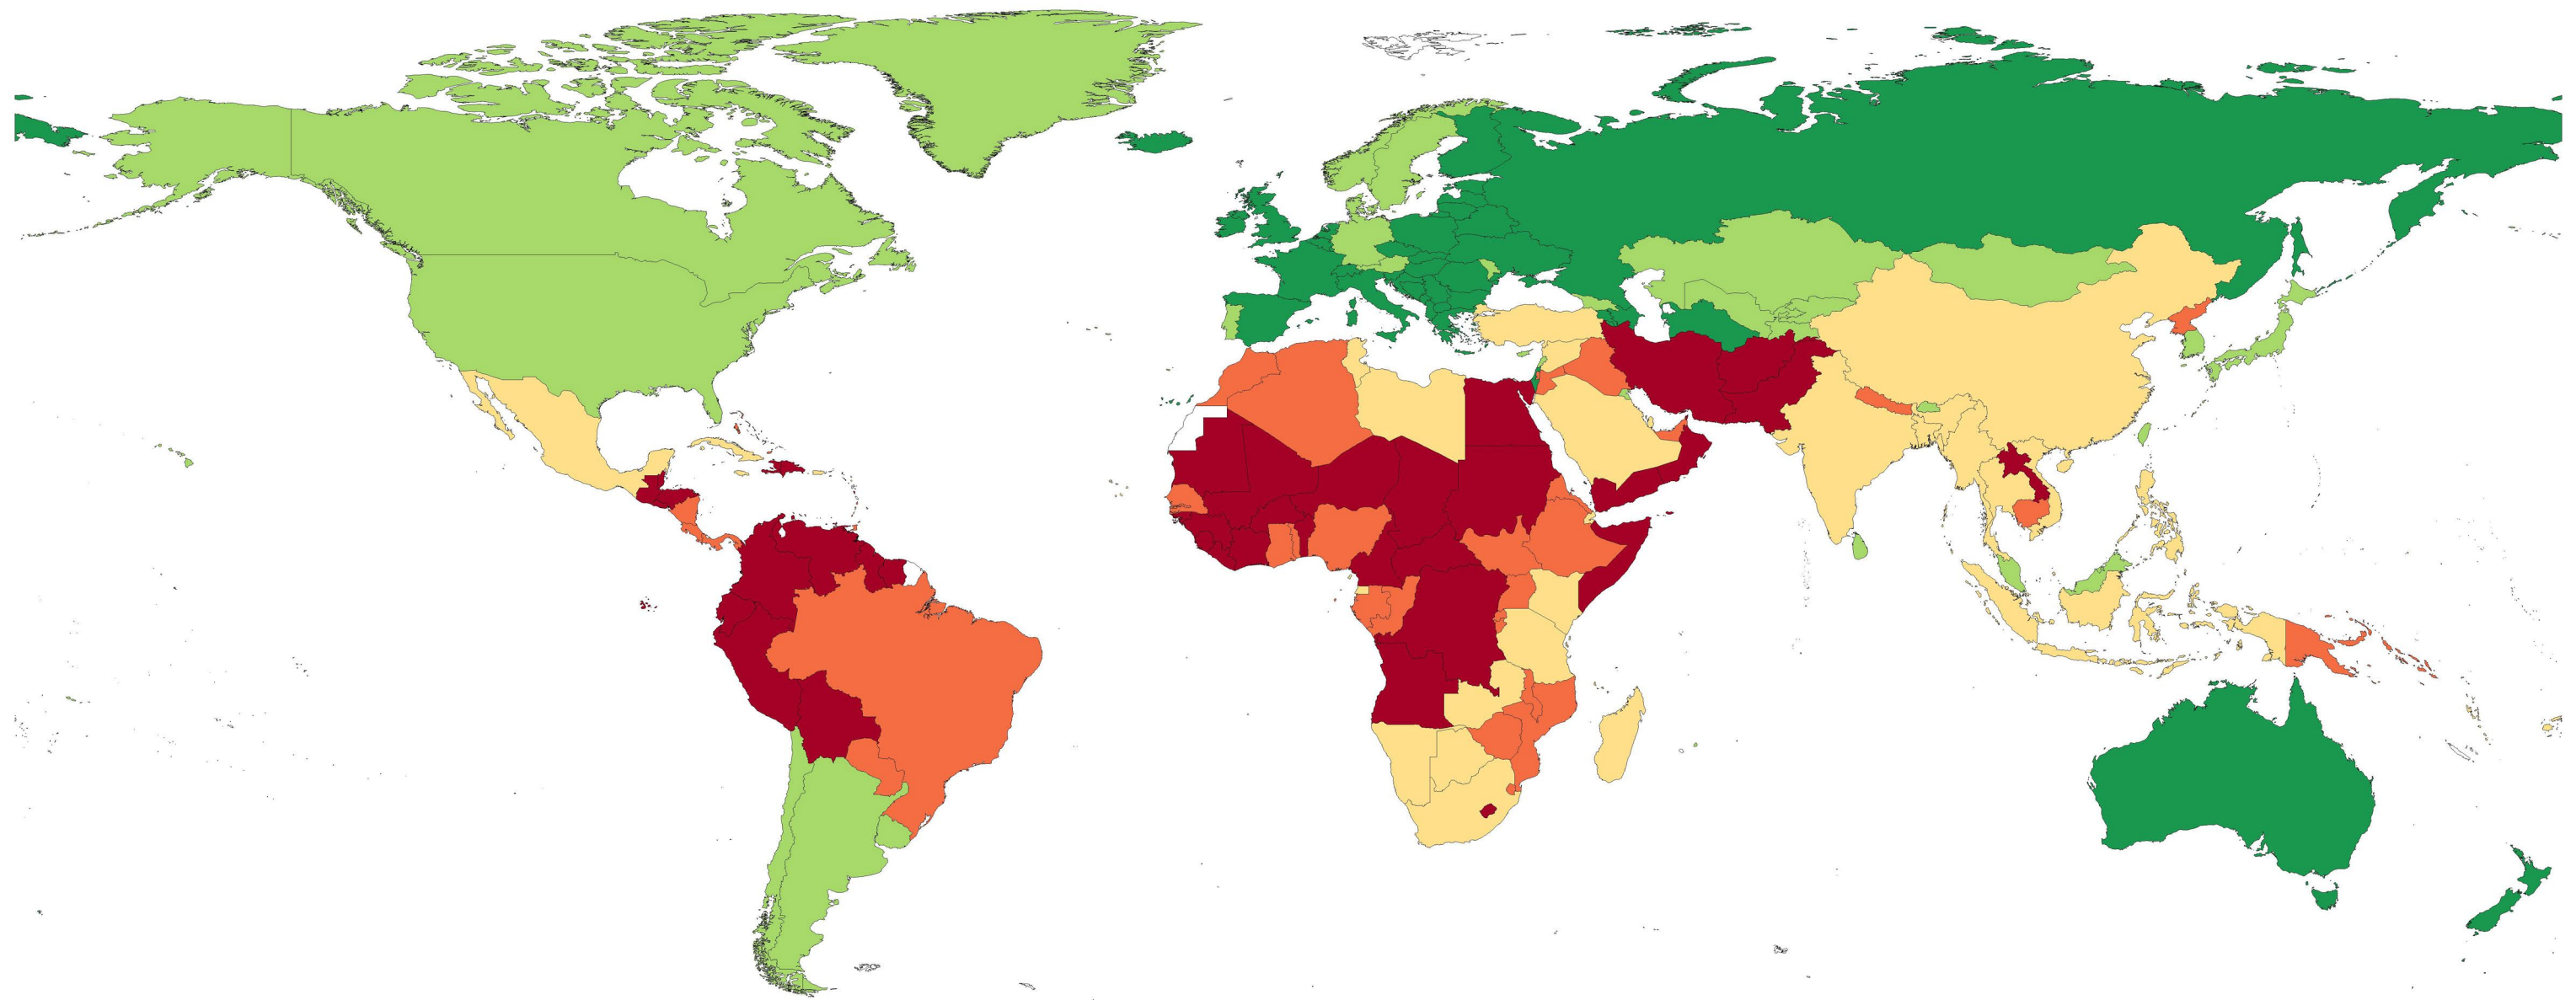

Road injuries, QCI (%)

■ < 86.4    ■ [86.4 to 89.5)    ■ [89.5 to 93.6)    ■ [93.6 to 98.1)    ■  $\geq 98.1$

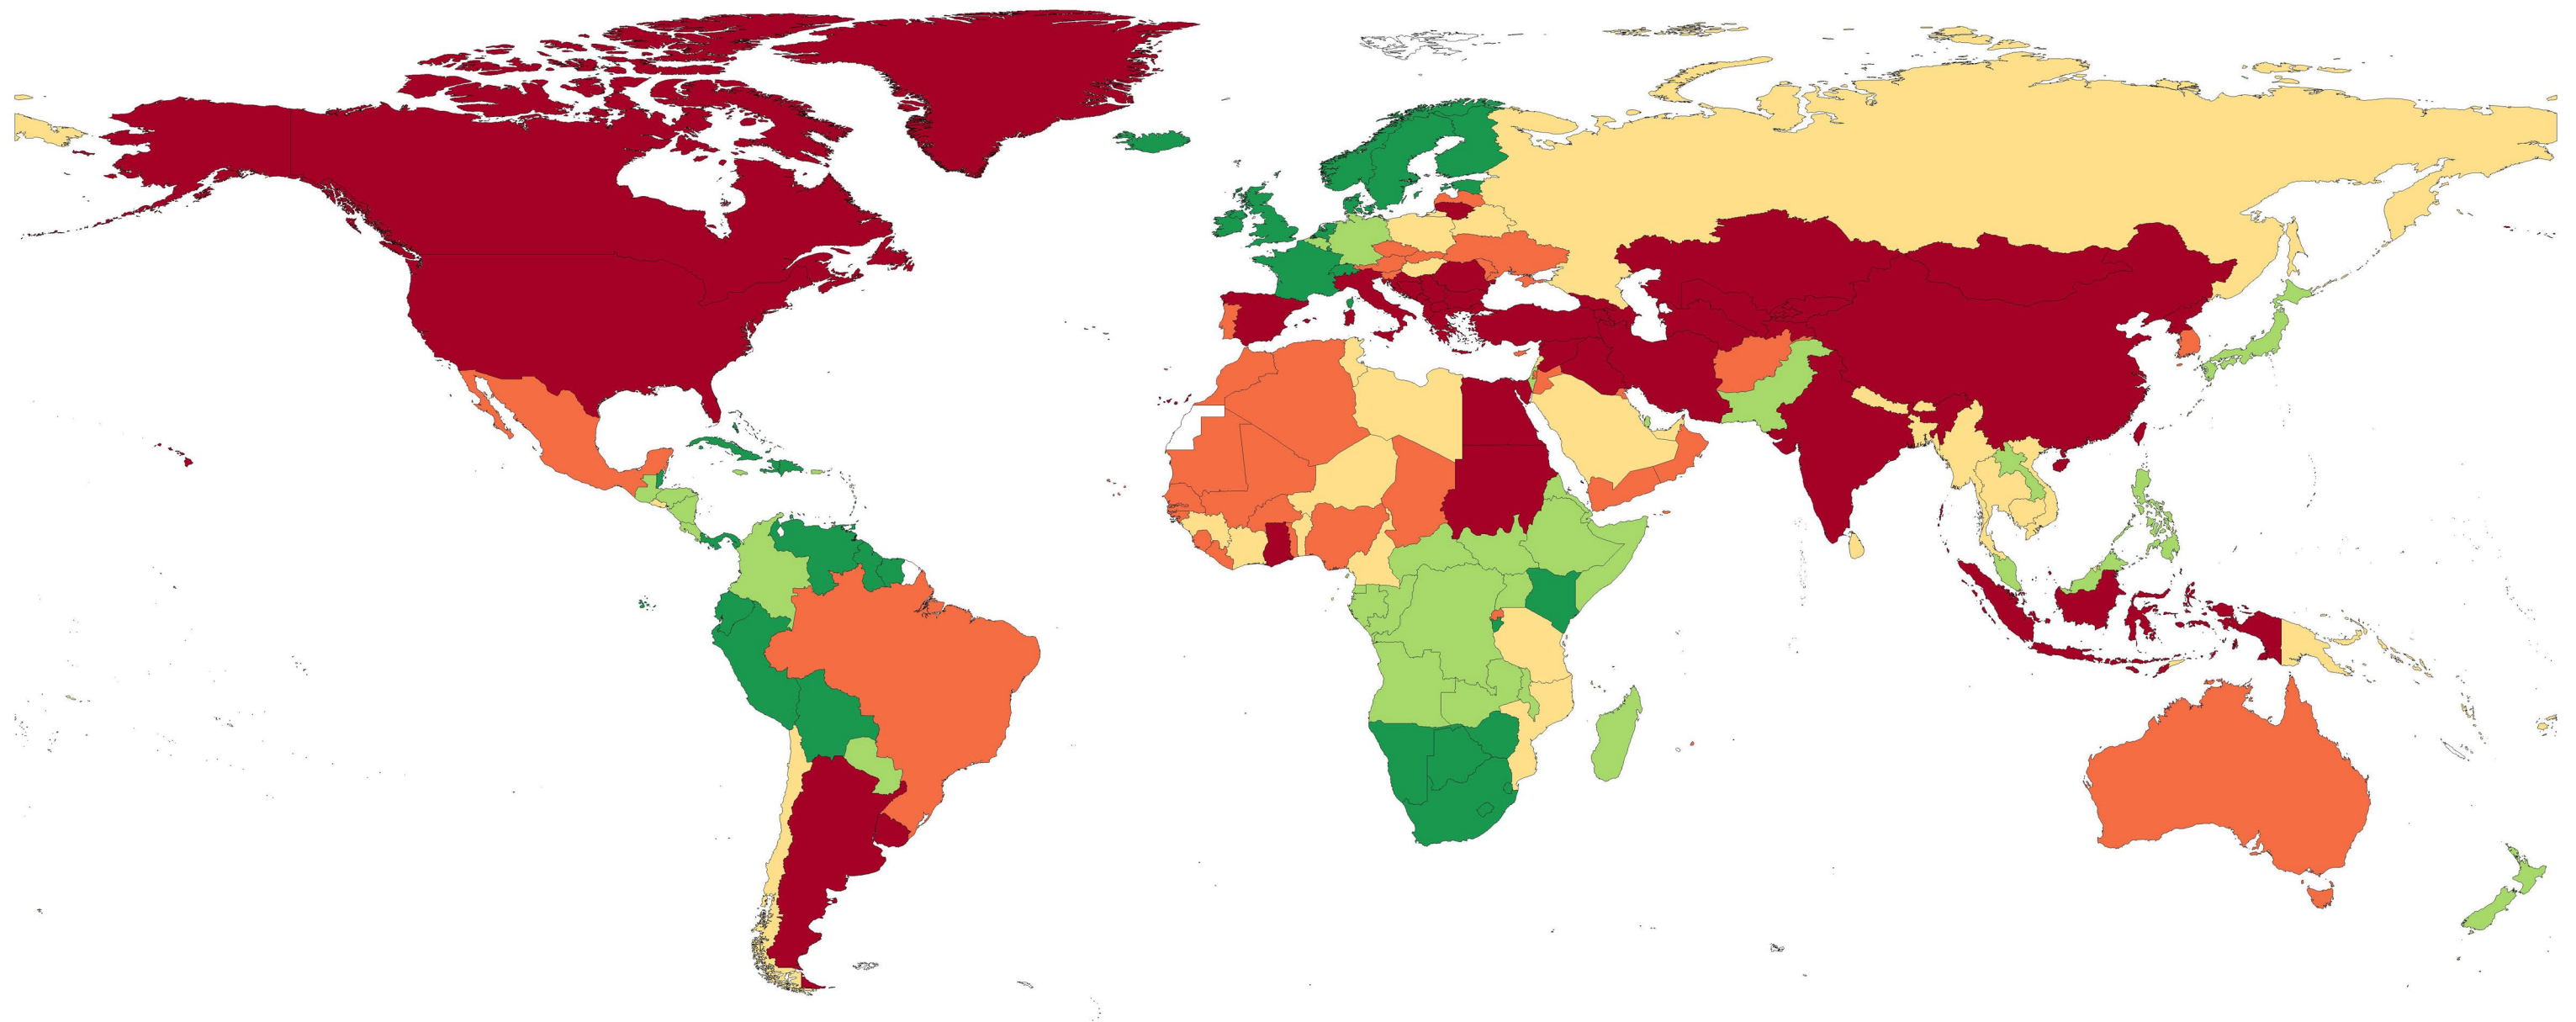

Dermatitis, QCI (%)

■ < 52.8    ■ [52.8 to 61.7)    ■ [61.7 to 67.4)    ■ [67.4 to 76.5)    ■  $\geq 76.5$



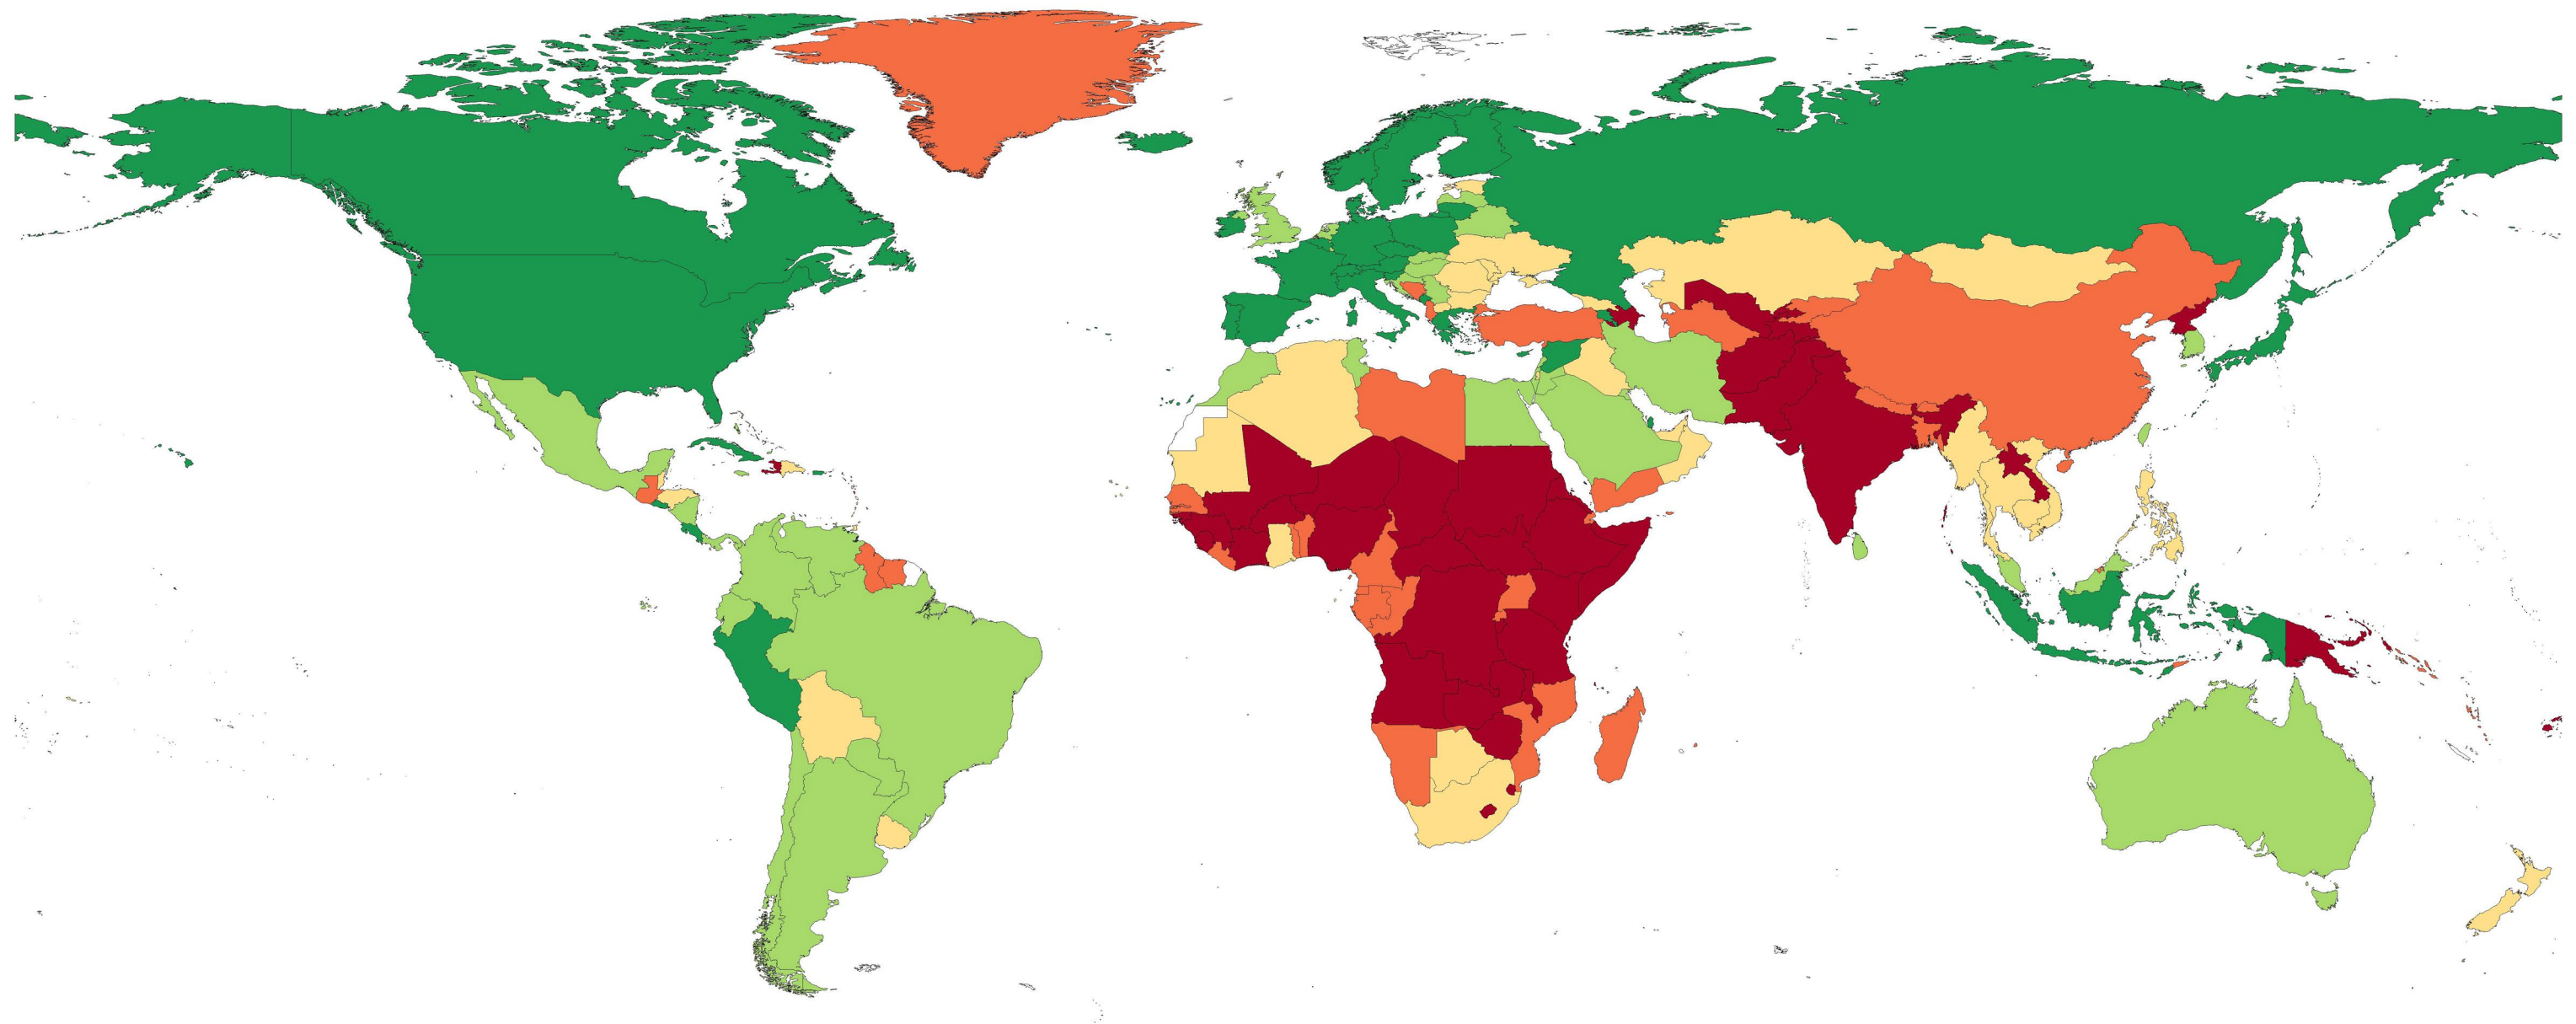

Epilepsy, QCI (%)

- < 78.1
- [78.1 to 86.3)
- [86.3 to 91.7)
- [91.7 to 95.2)
- ≥ 95.2

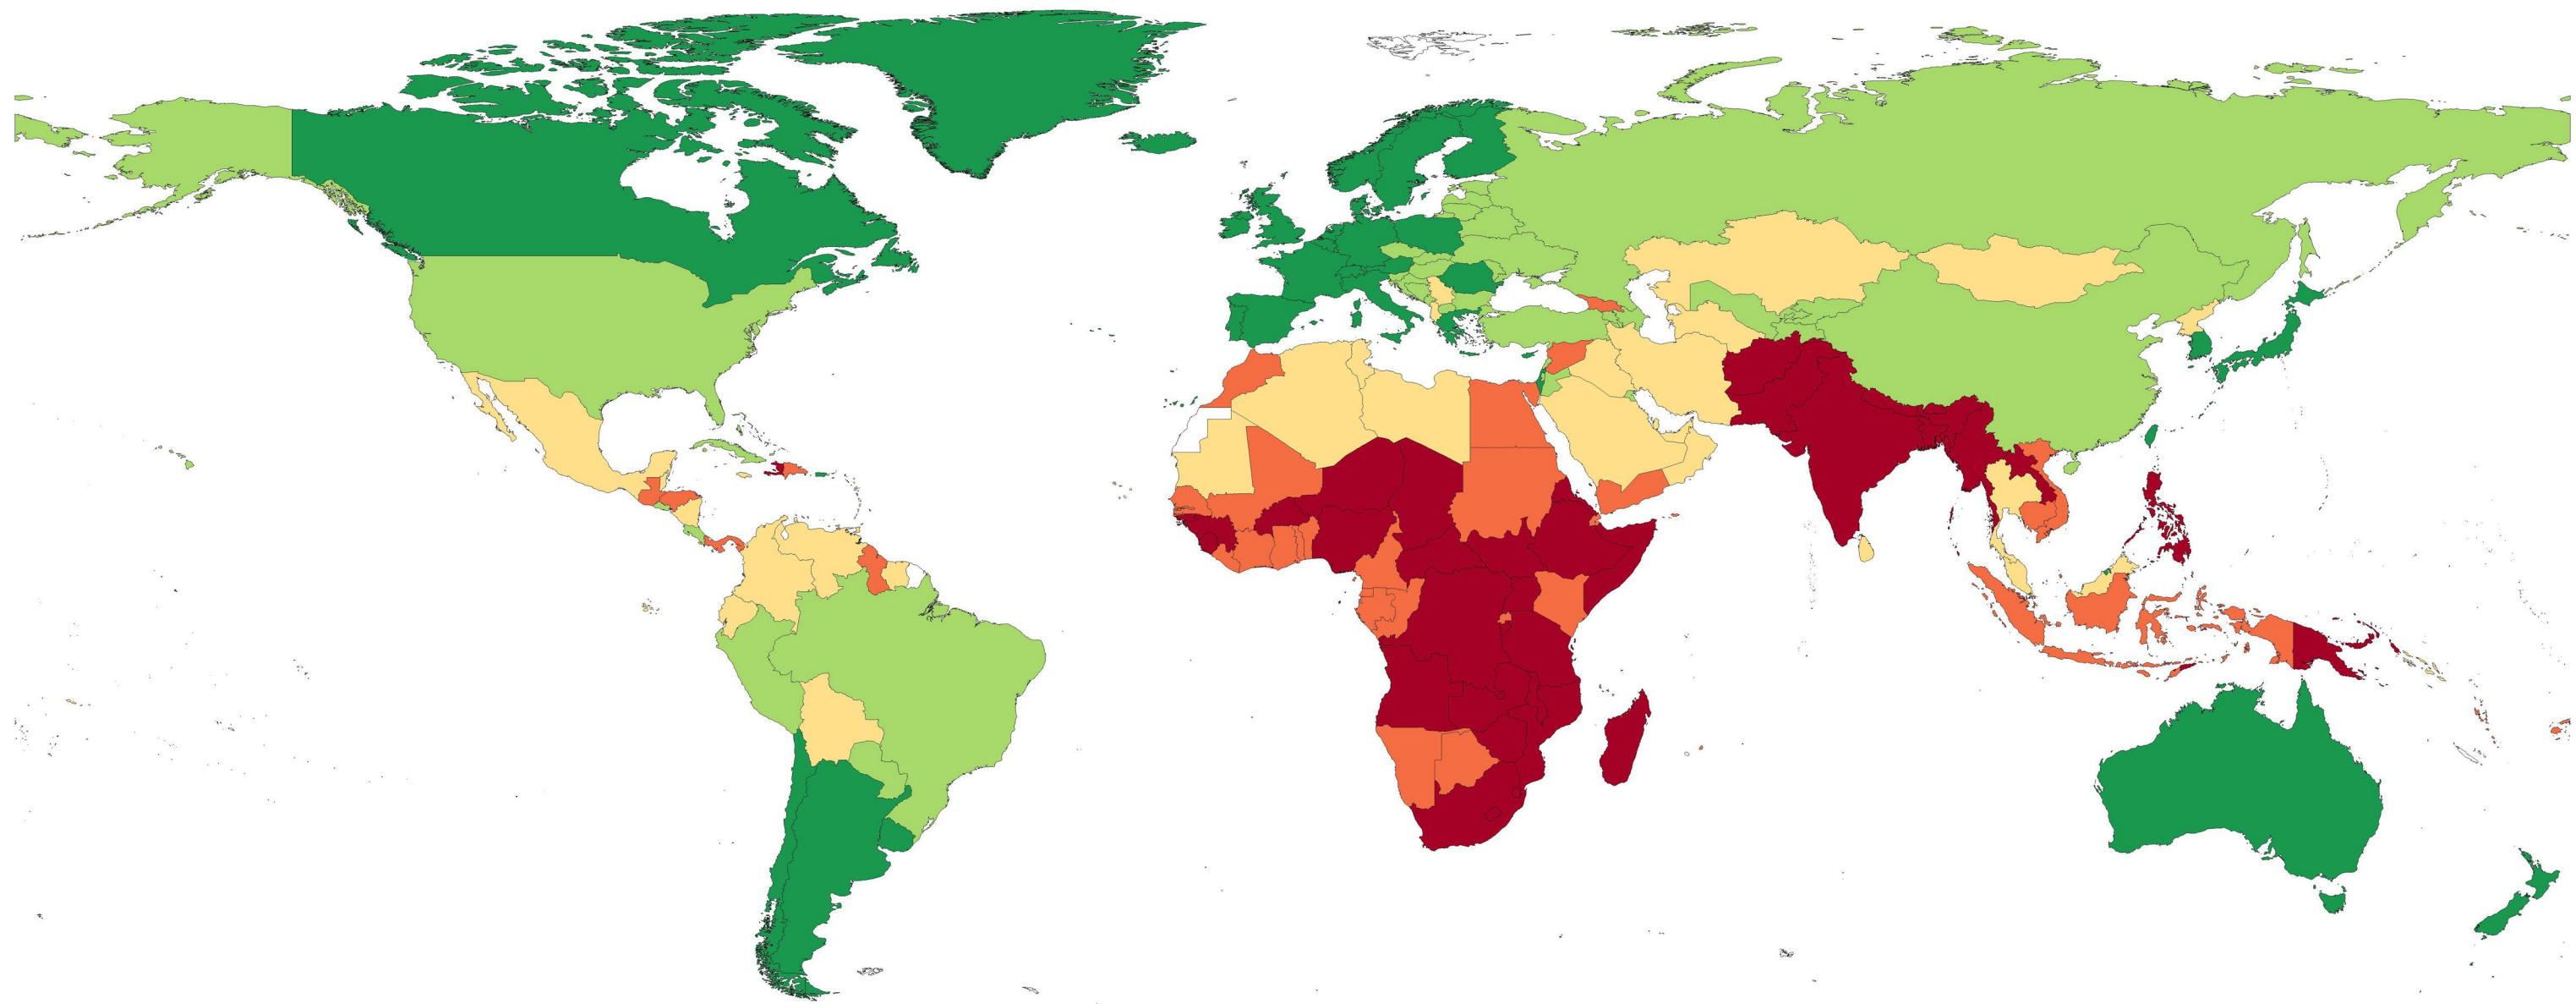

Asthma, QCI (%)

■ < 90.0    ■ [90.0 to 92.9)    ■ [92.9 to 93.8)    ■ [93.8 to 94.5)    ■ ≥ 94.5



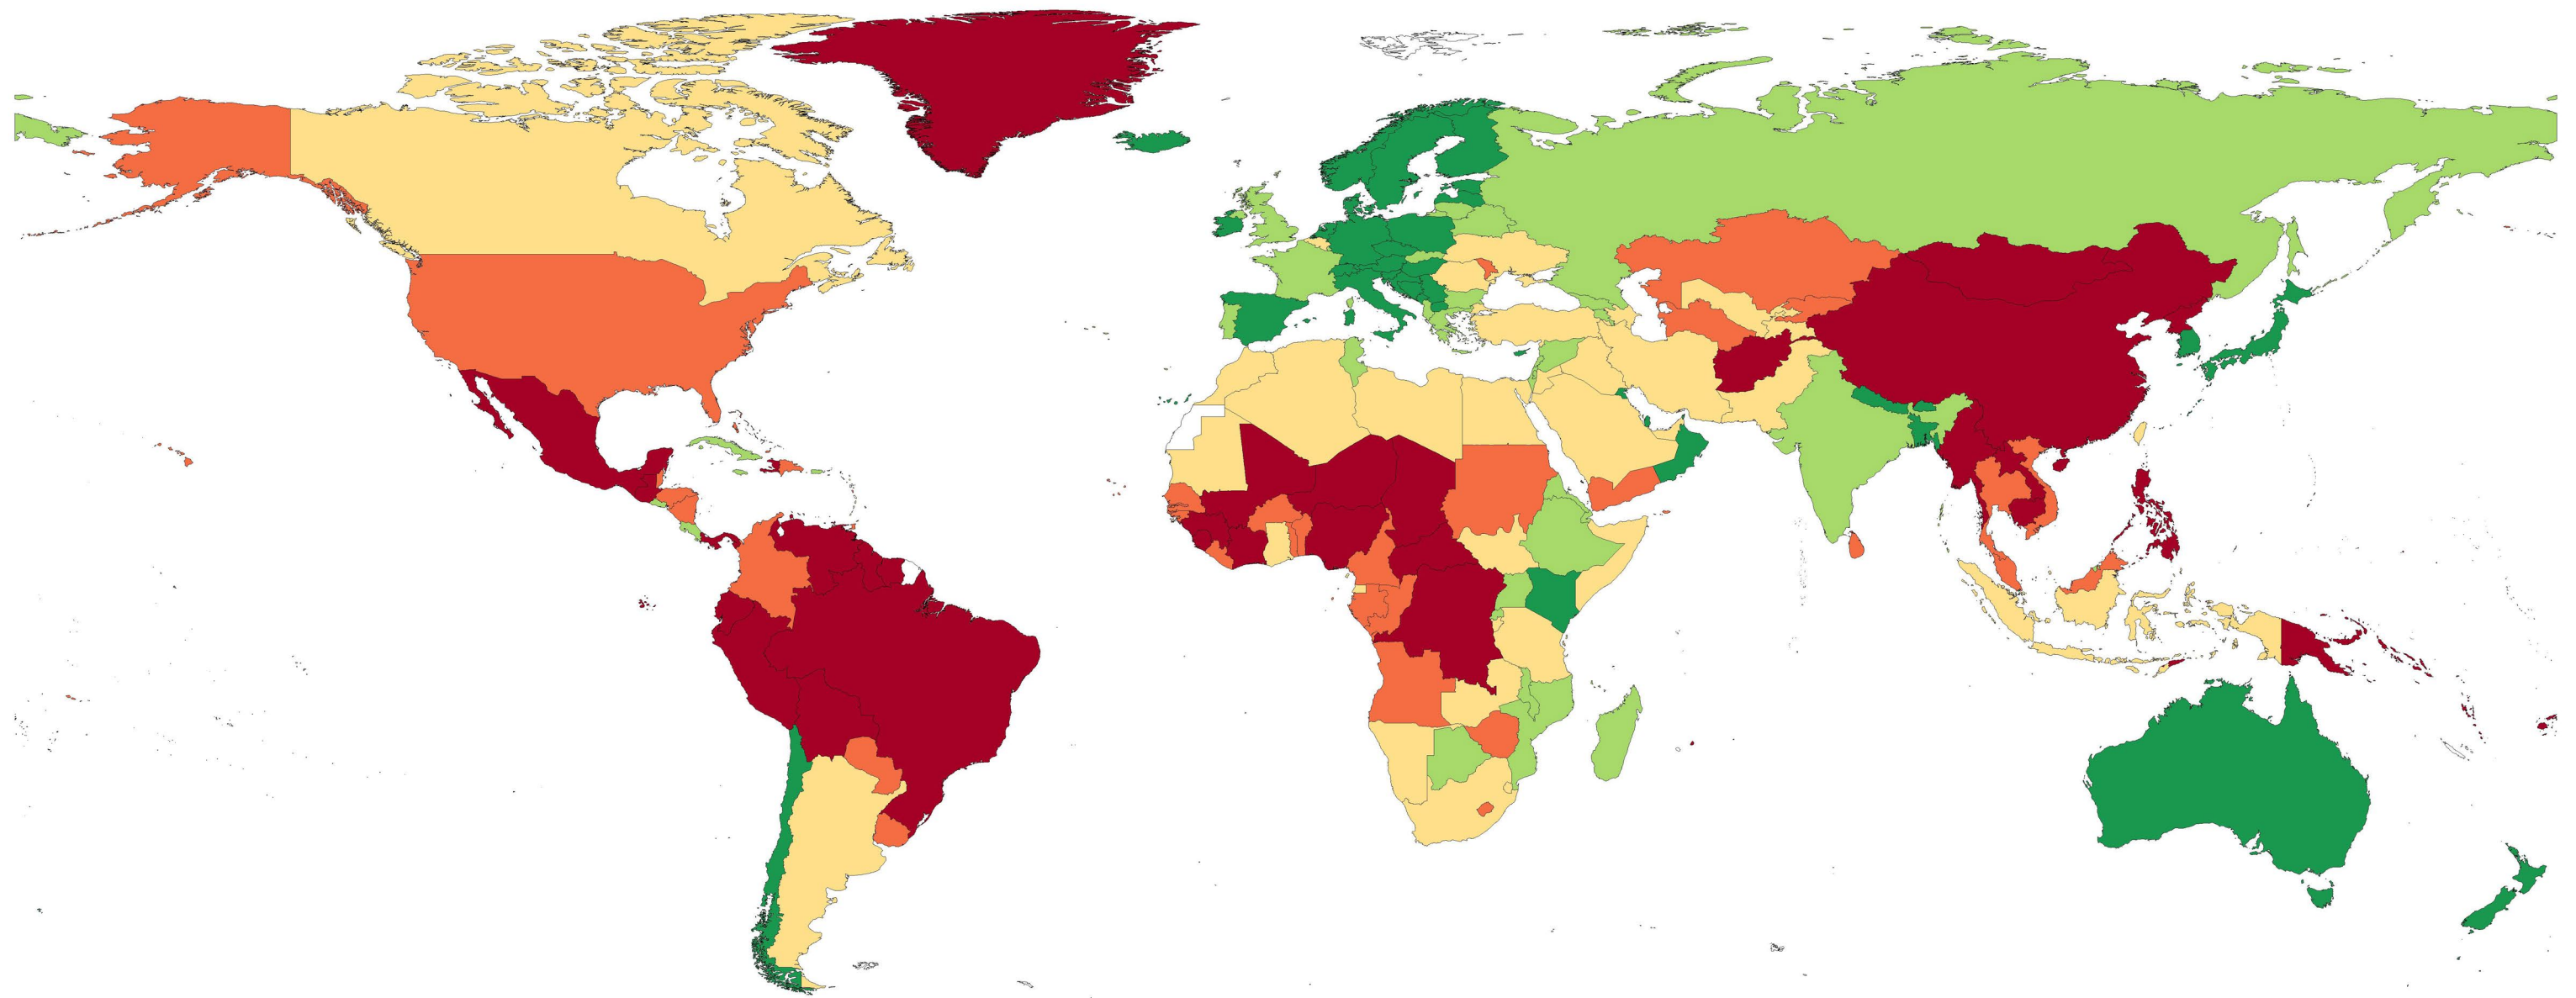

Foreign body, QCI (%)

- < 89.3
- [89.3 to 93.5)
- [93.5 to 96.3)
- [96.3 to 97.6)
- ≥ 97.6

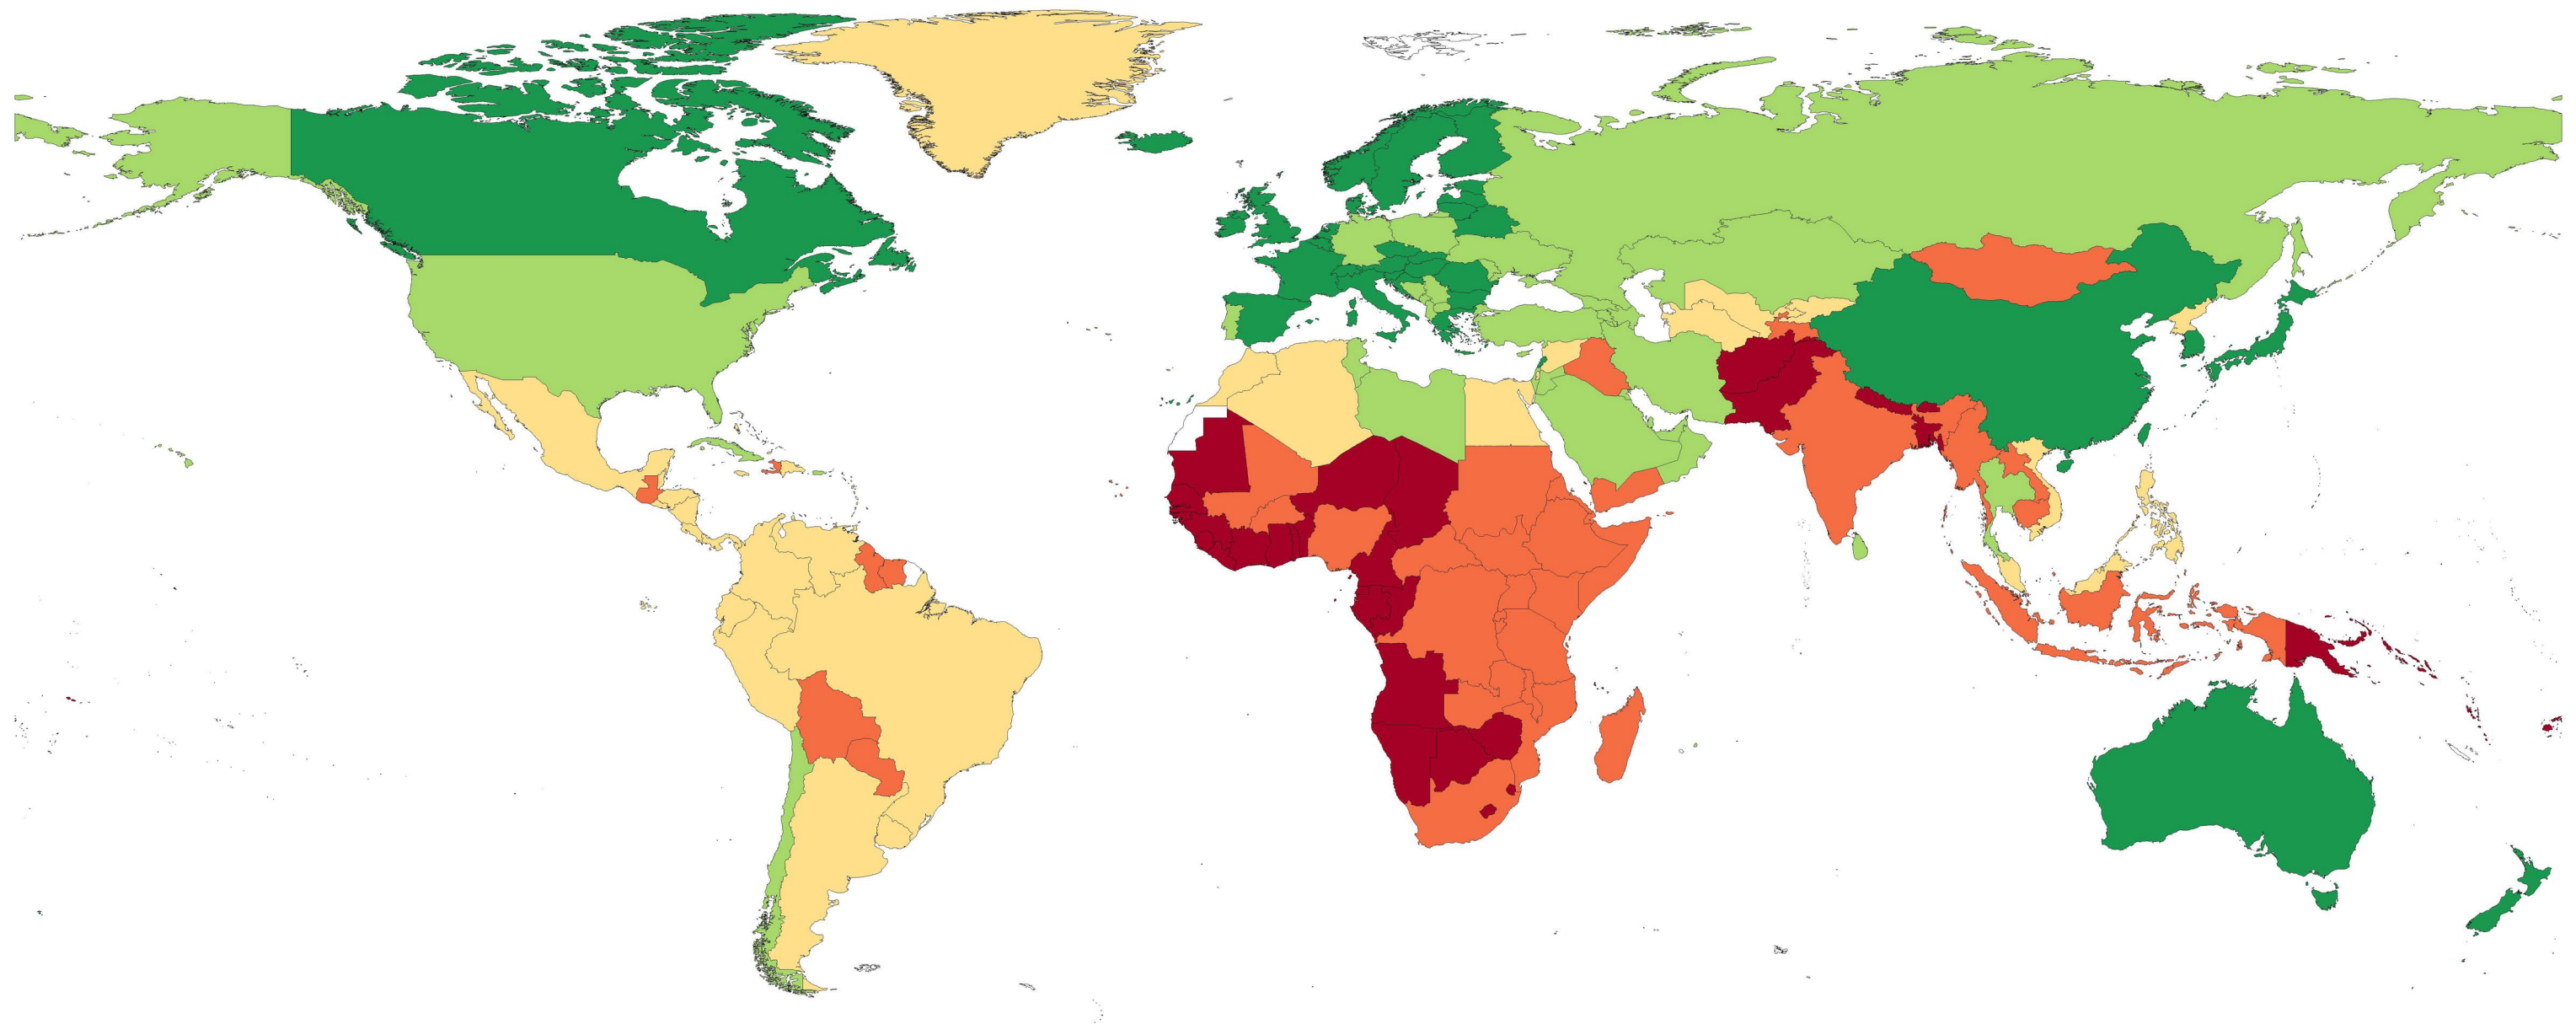

Leukemia, QCI (%)

■ < 23.6    ■ [23.6 to 31.4)    ■ [31.4 to 54.0)    ■ [54.0 to 81.3)    ■  $\geq 81.3$



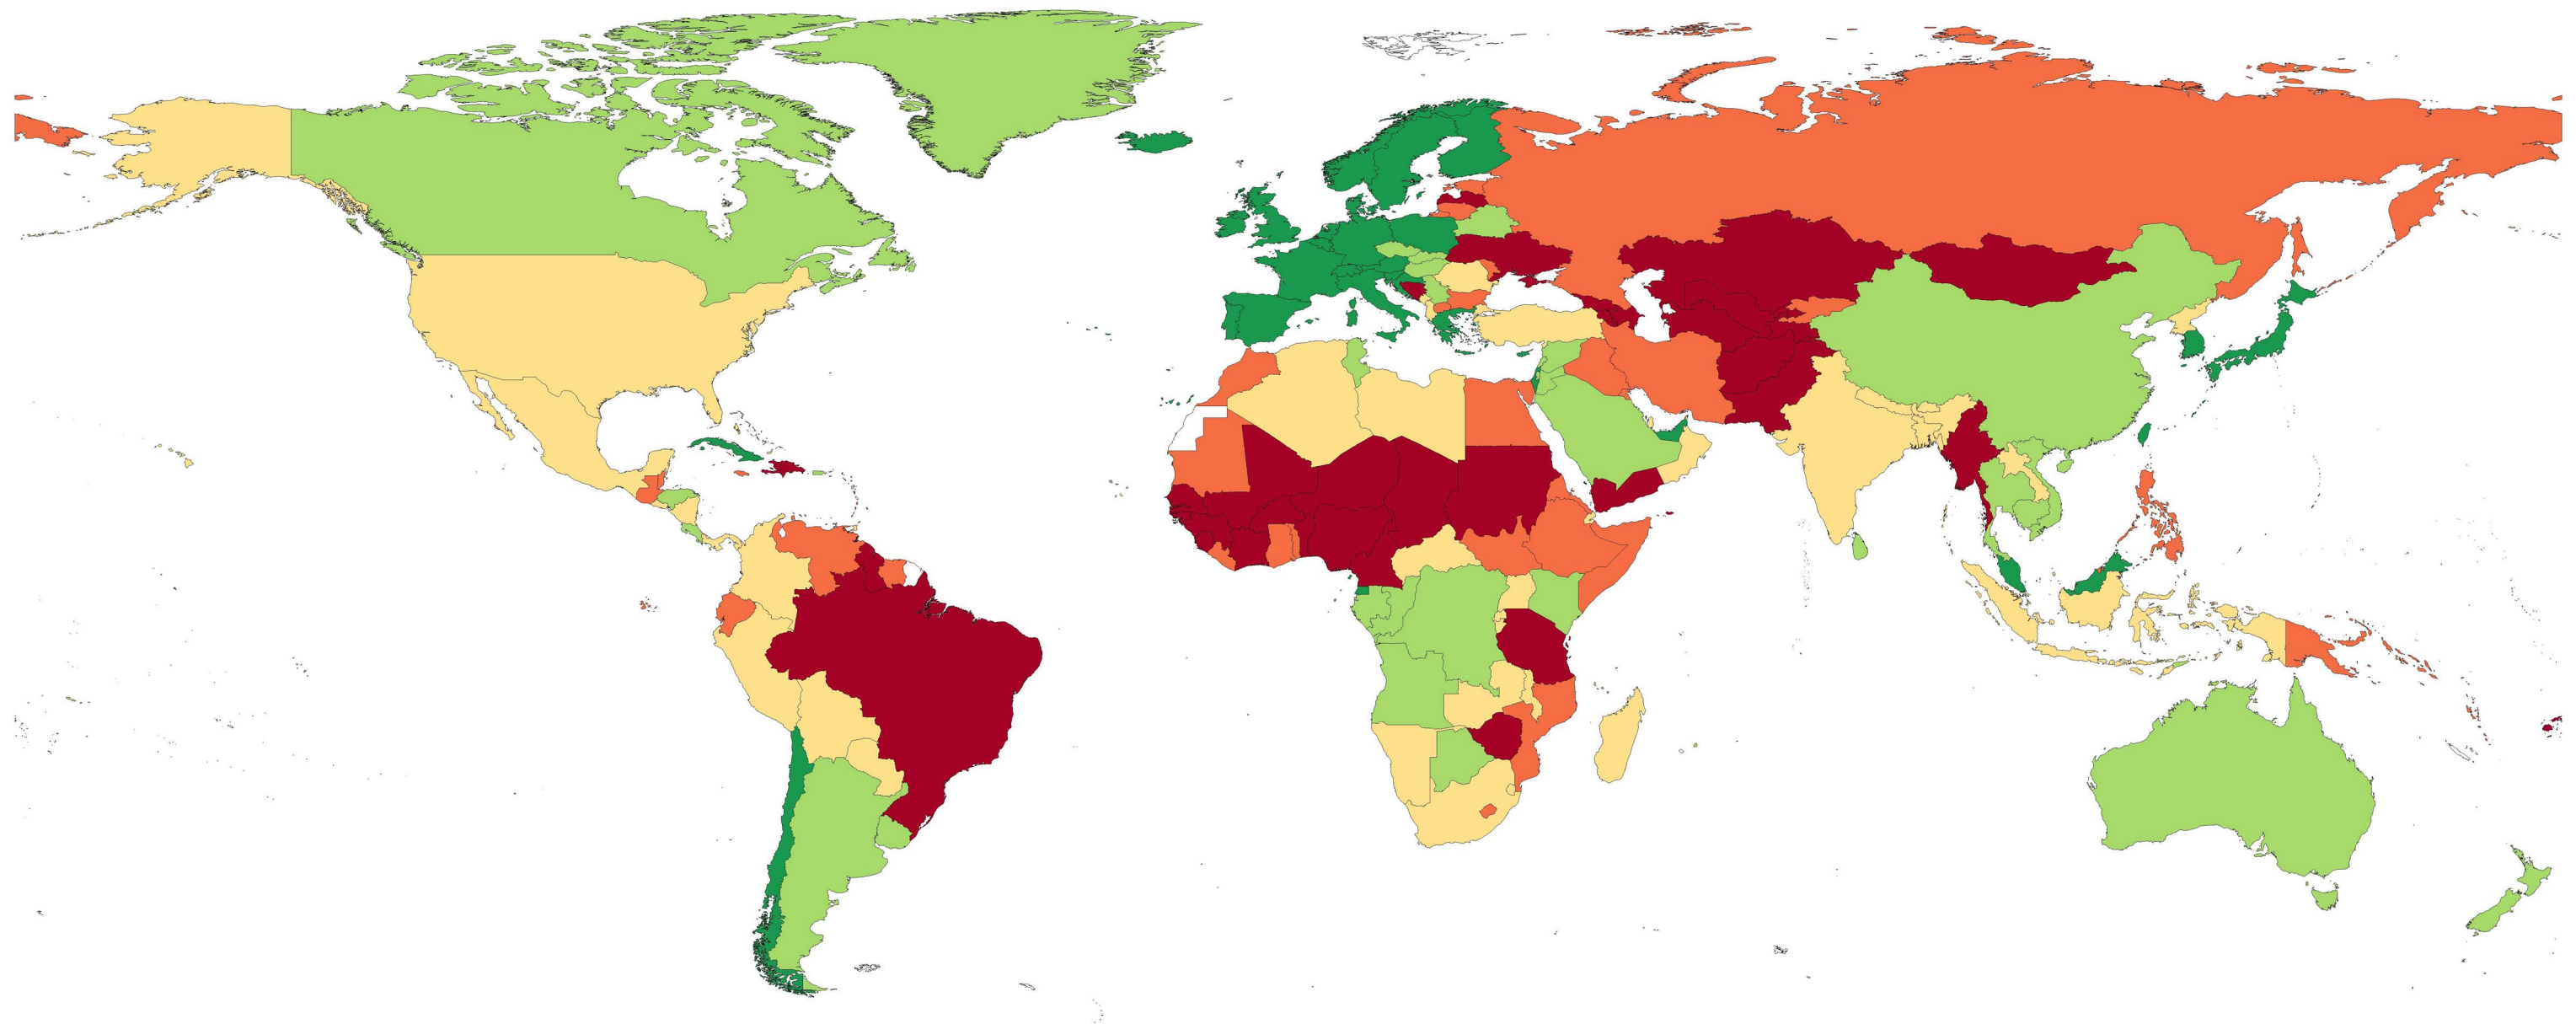

Diabetes mellitus, QCI (%)

- < 69.2
- [69.2 to 78.6)
- [78.6 to 84.2)
- [84.2 to 91.7)
- ≥ 91.7

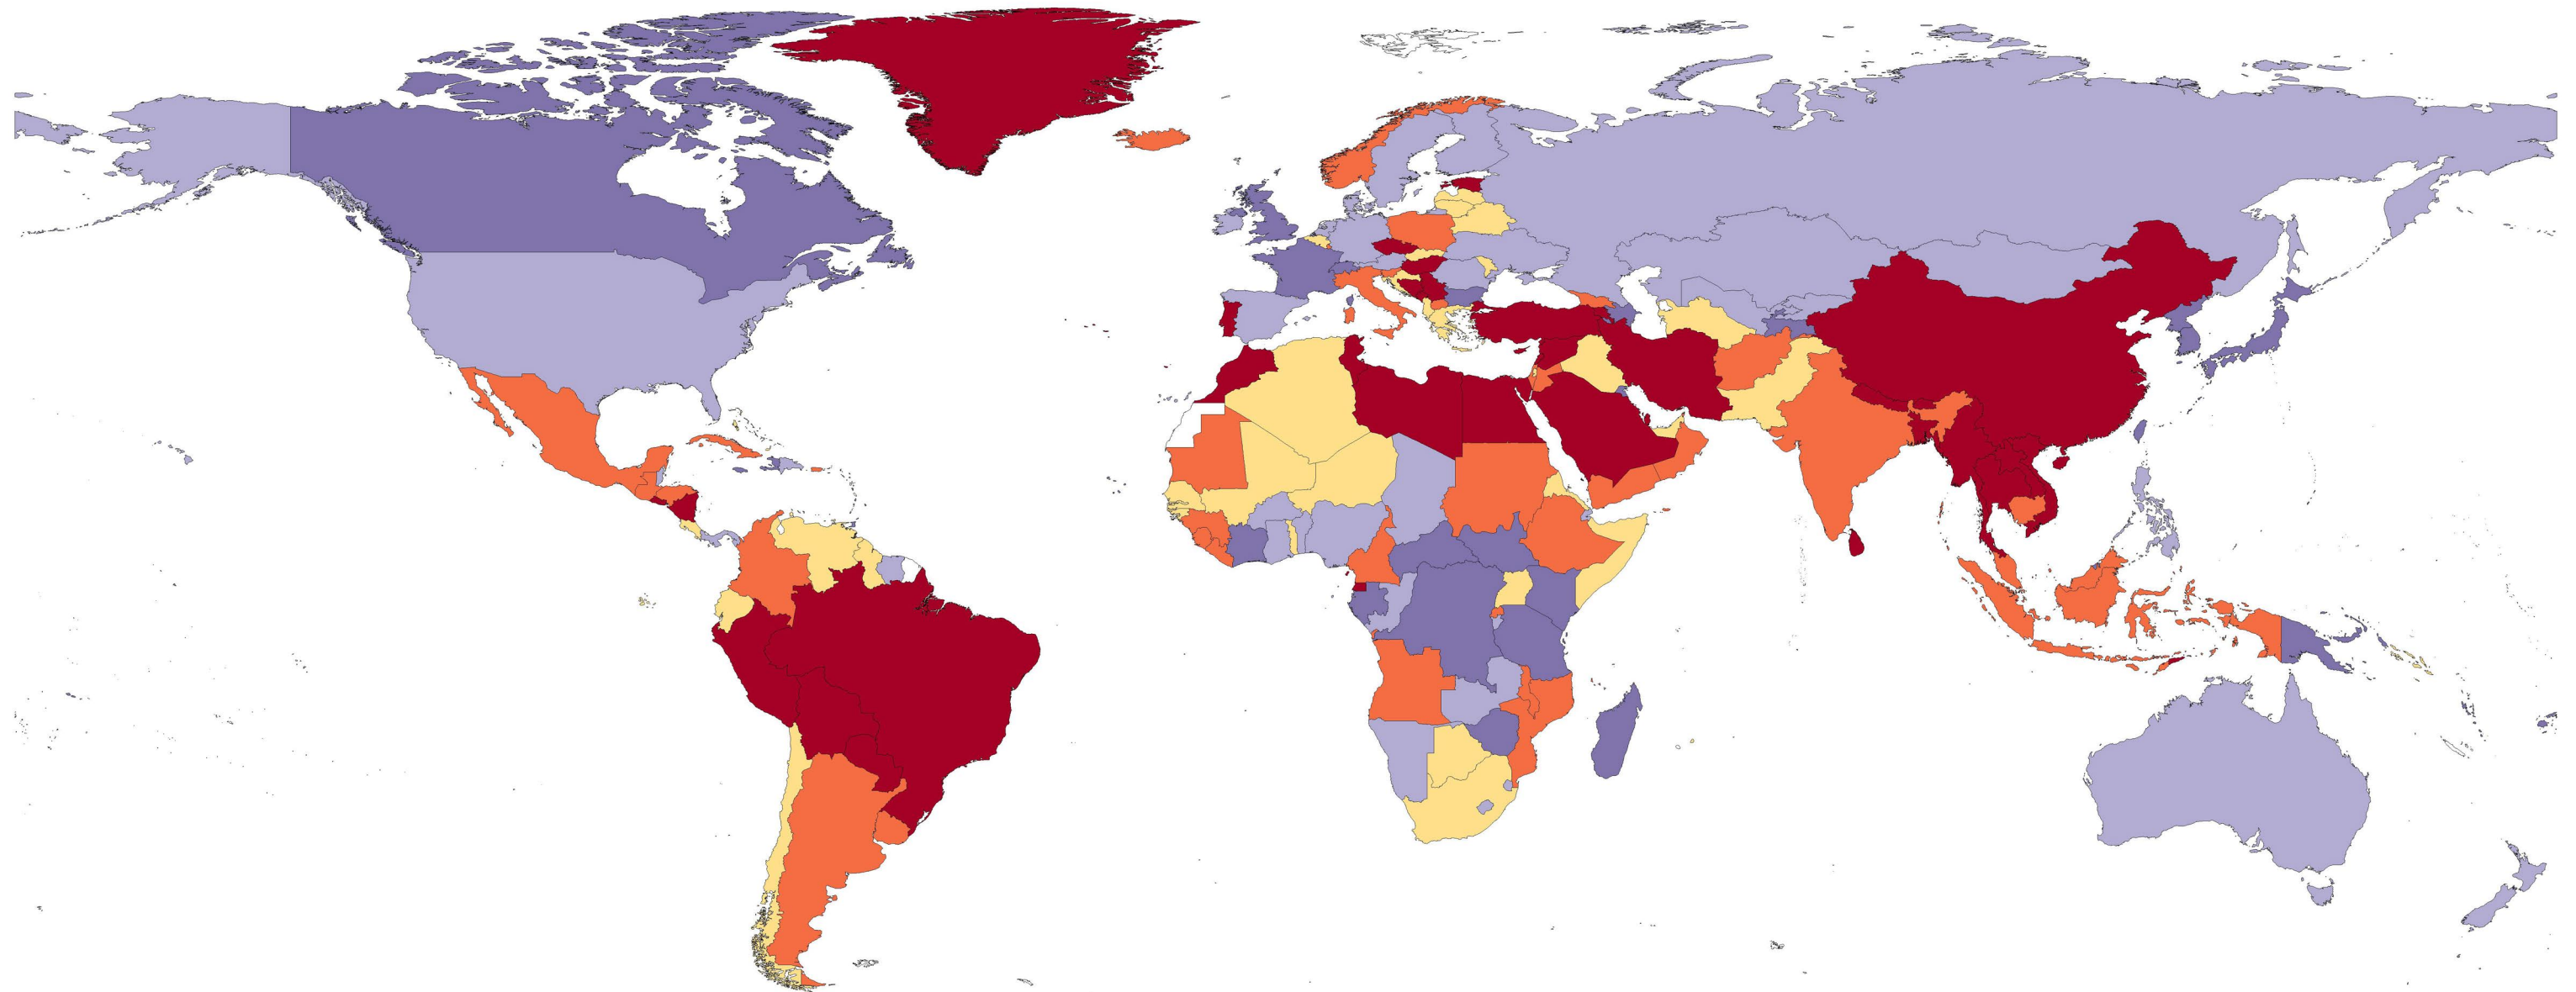

Percent change in DALYs rate due to Neonatal disorders (%), 1990 to 2017

■ < -62.5    ■ [-62.5 to -54.3)    ■ [-54.3 to -44.9)    ■ [-44.9 to -35.4)    ■ ≥ -35.4



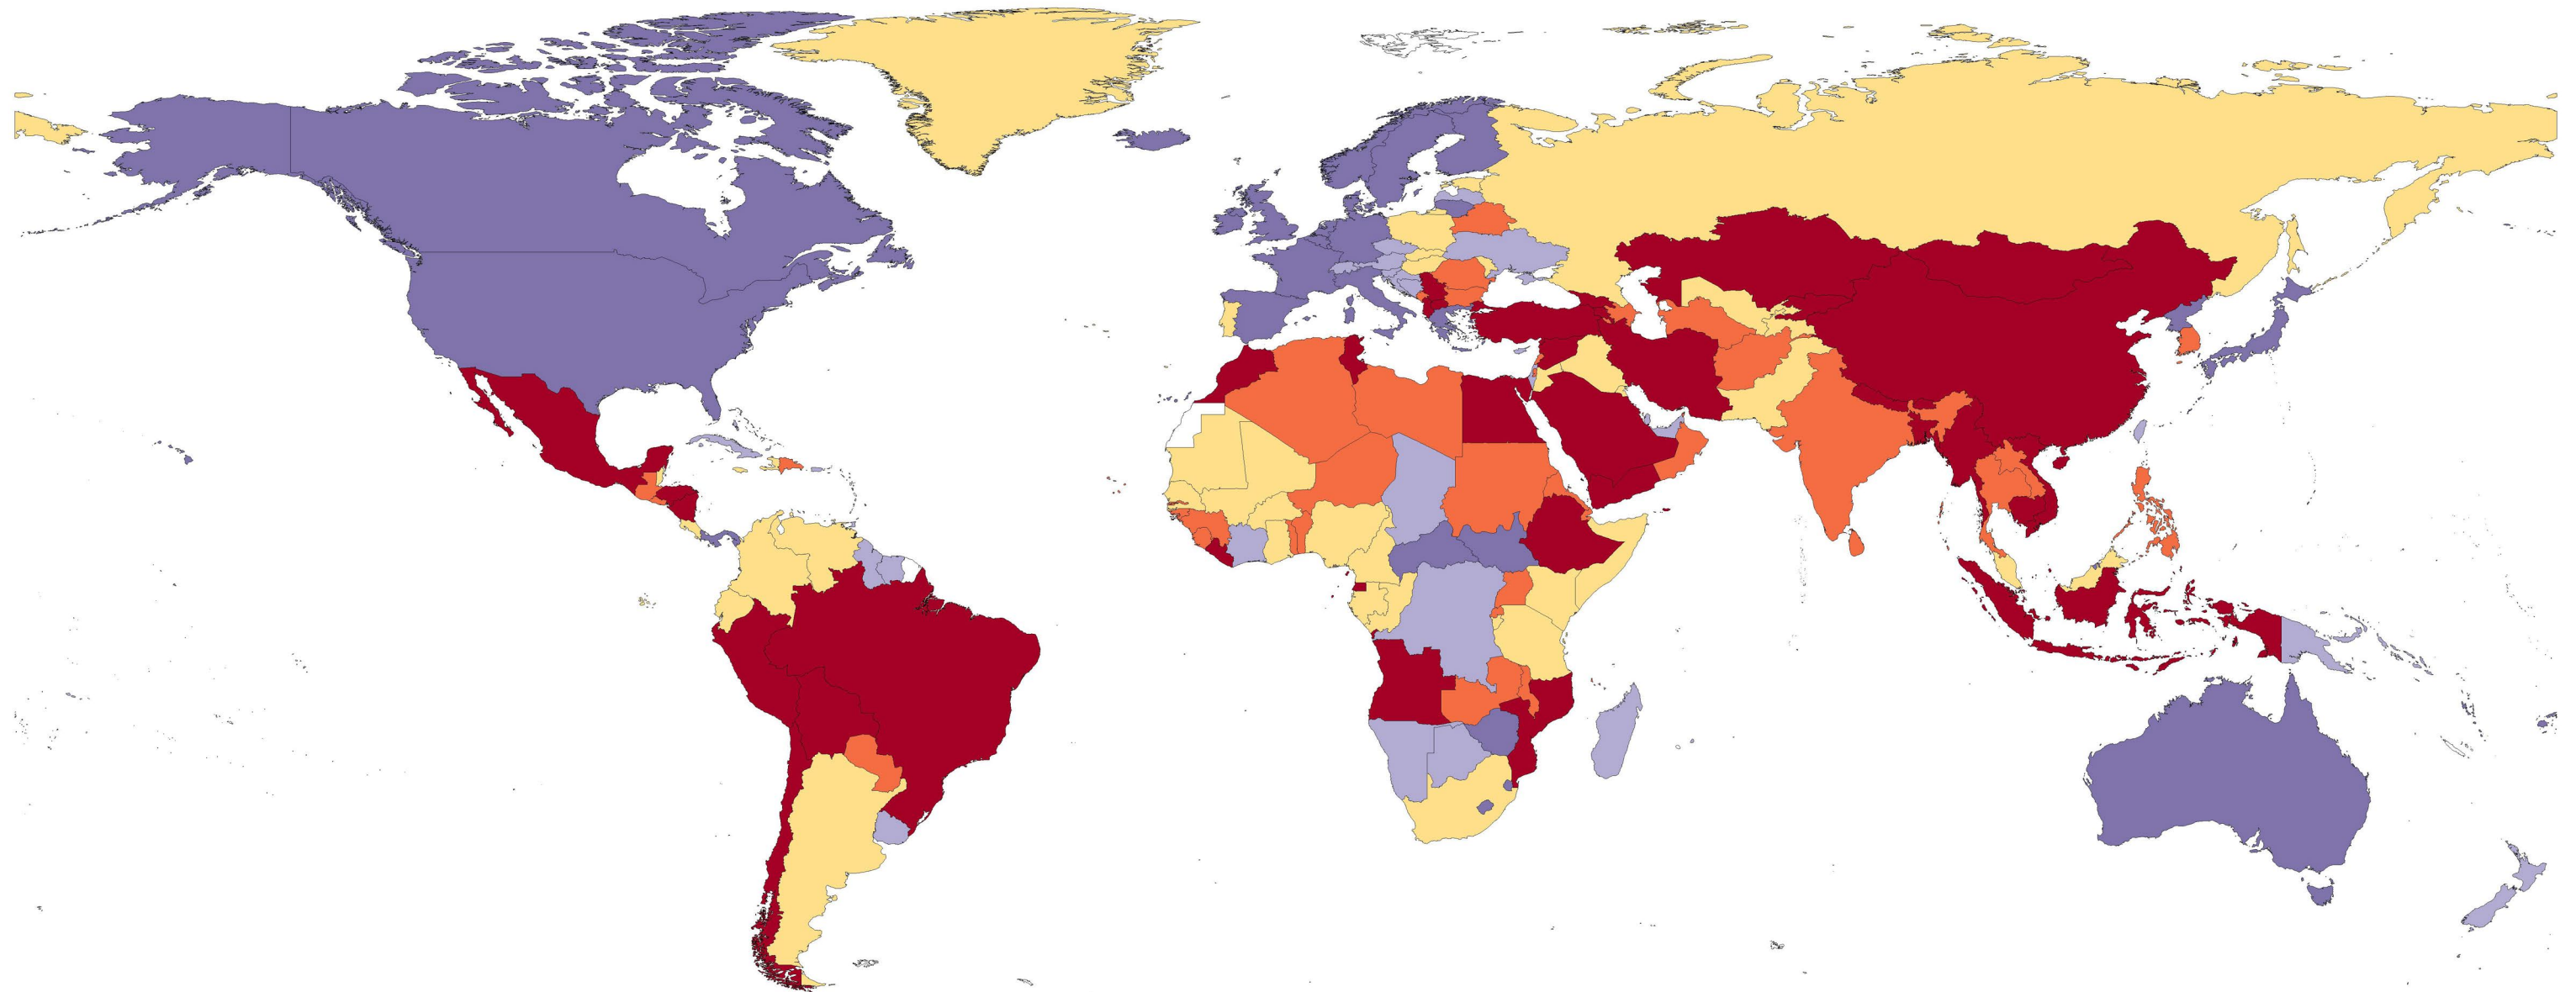

Percent change in DALYs rate due to Respiratory infections and tuberculosis (%), 1990 to 2017

■ < -78.4    ■ [-78.4 to -71.1)    ■ [-71.1 to -57.6)    ■ [-57.6 to -40.3)    ■ ≥ -40.3

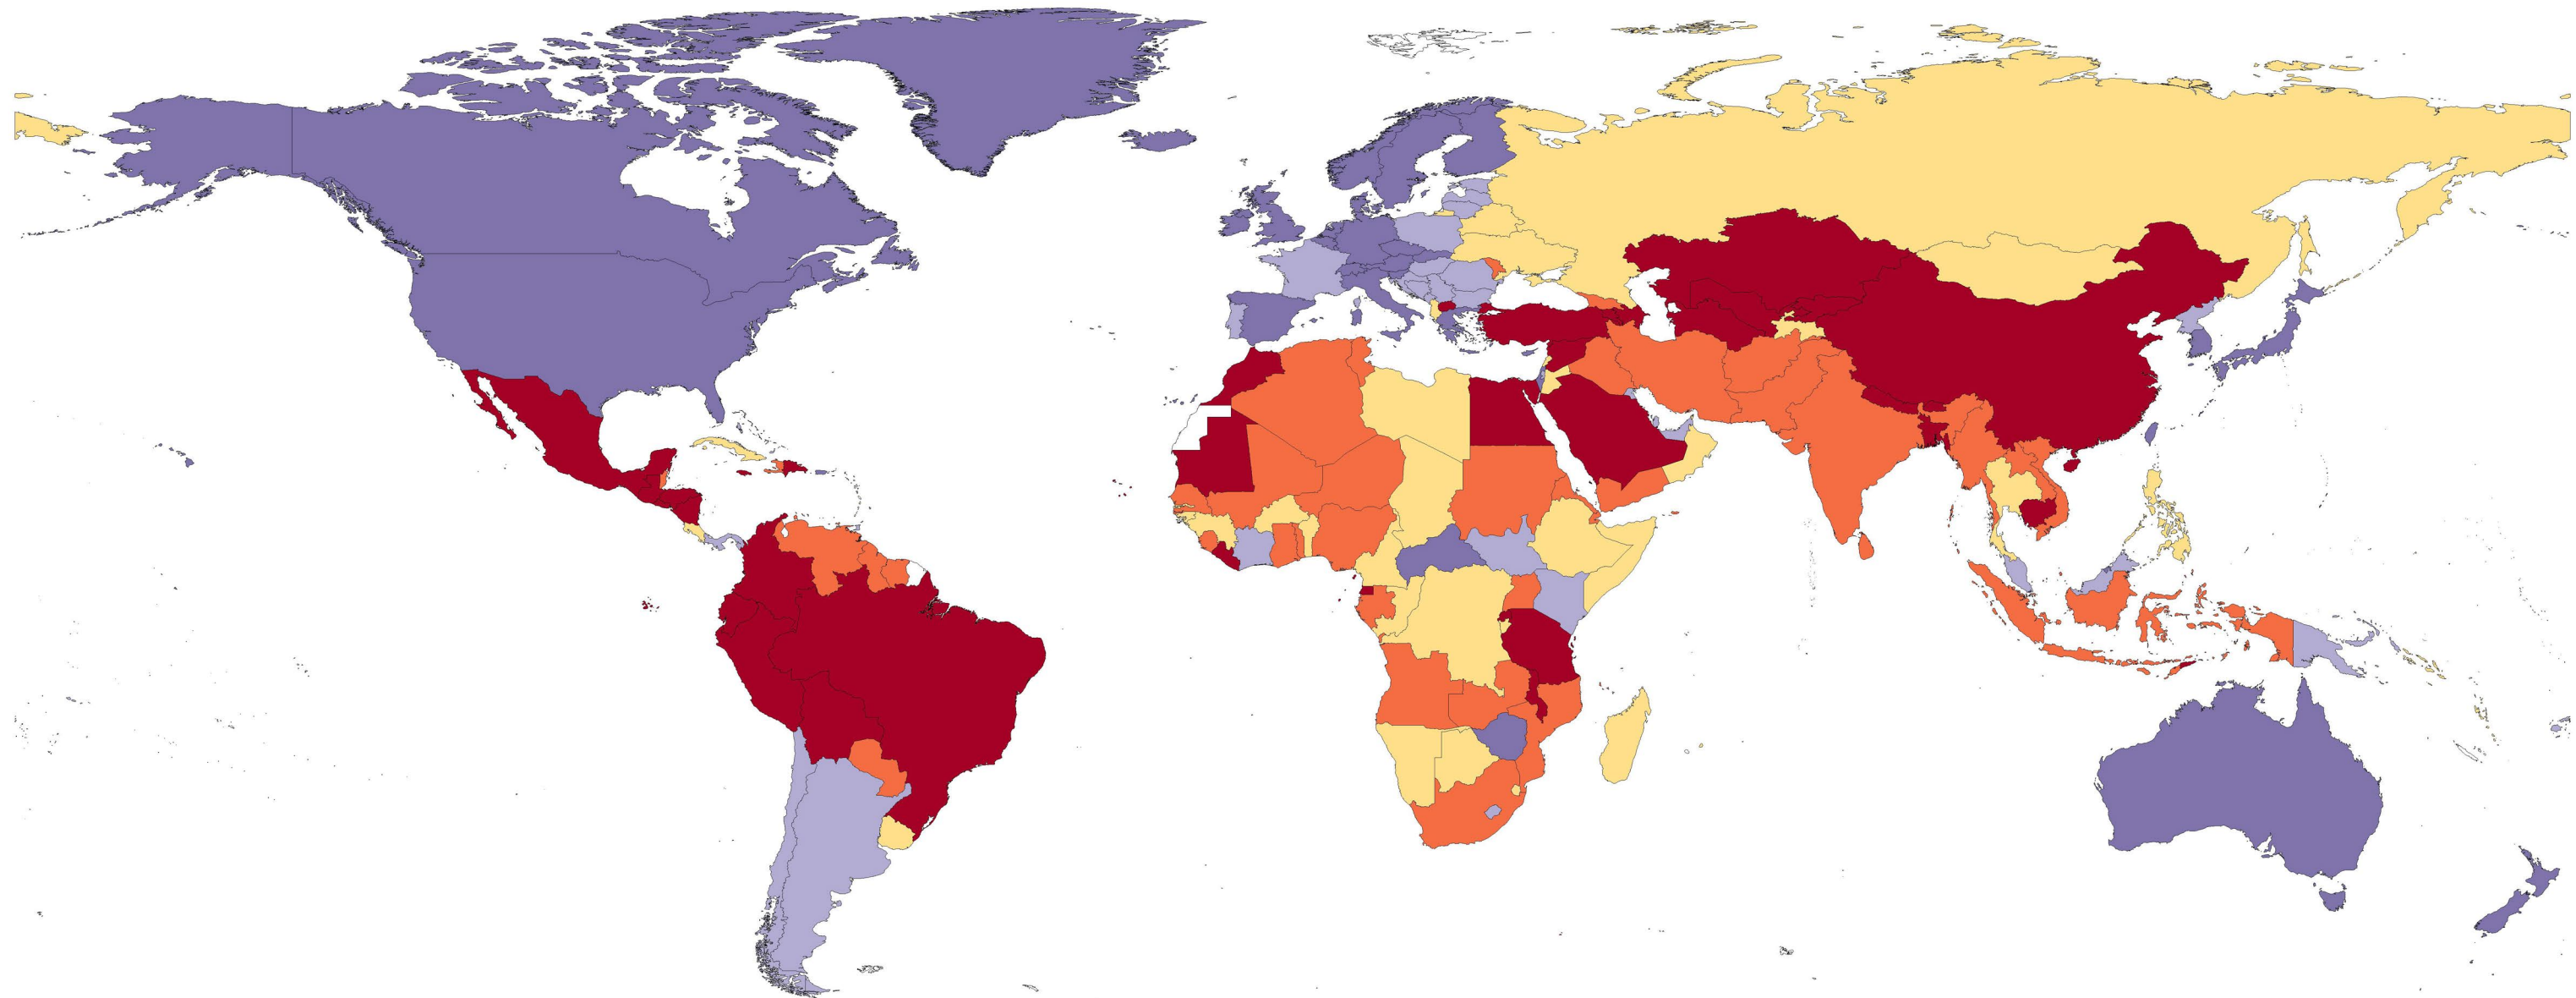

Percent change in DALYs rate due to Enteric infections (%), 1990 to 2017

■ < -81.2    ■ [-81.2 to -70.0)    ■ [-70.0 to -48.3)    ■ [-48.3 to -4.6)    ■ ≥ -4.6



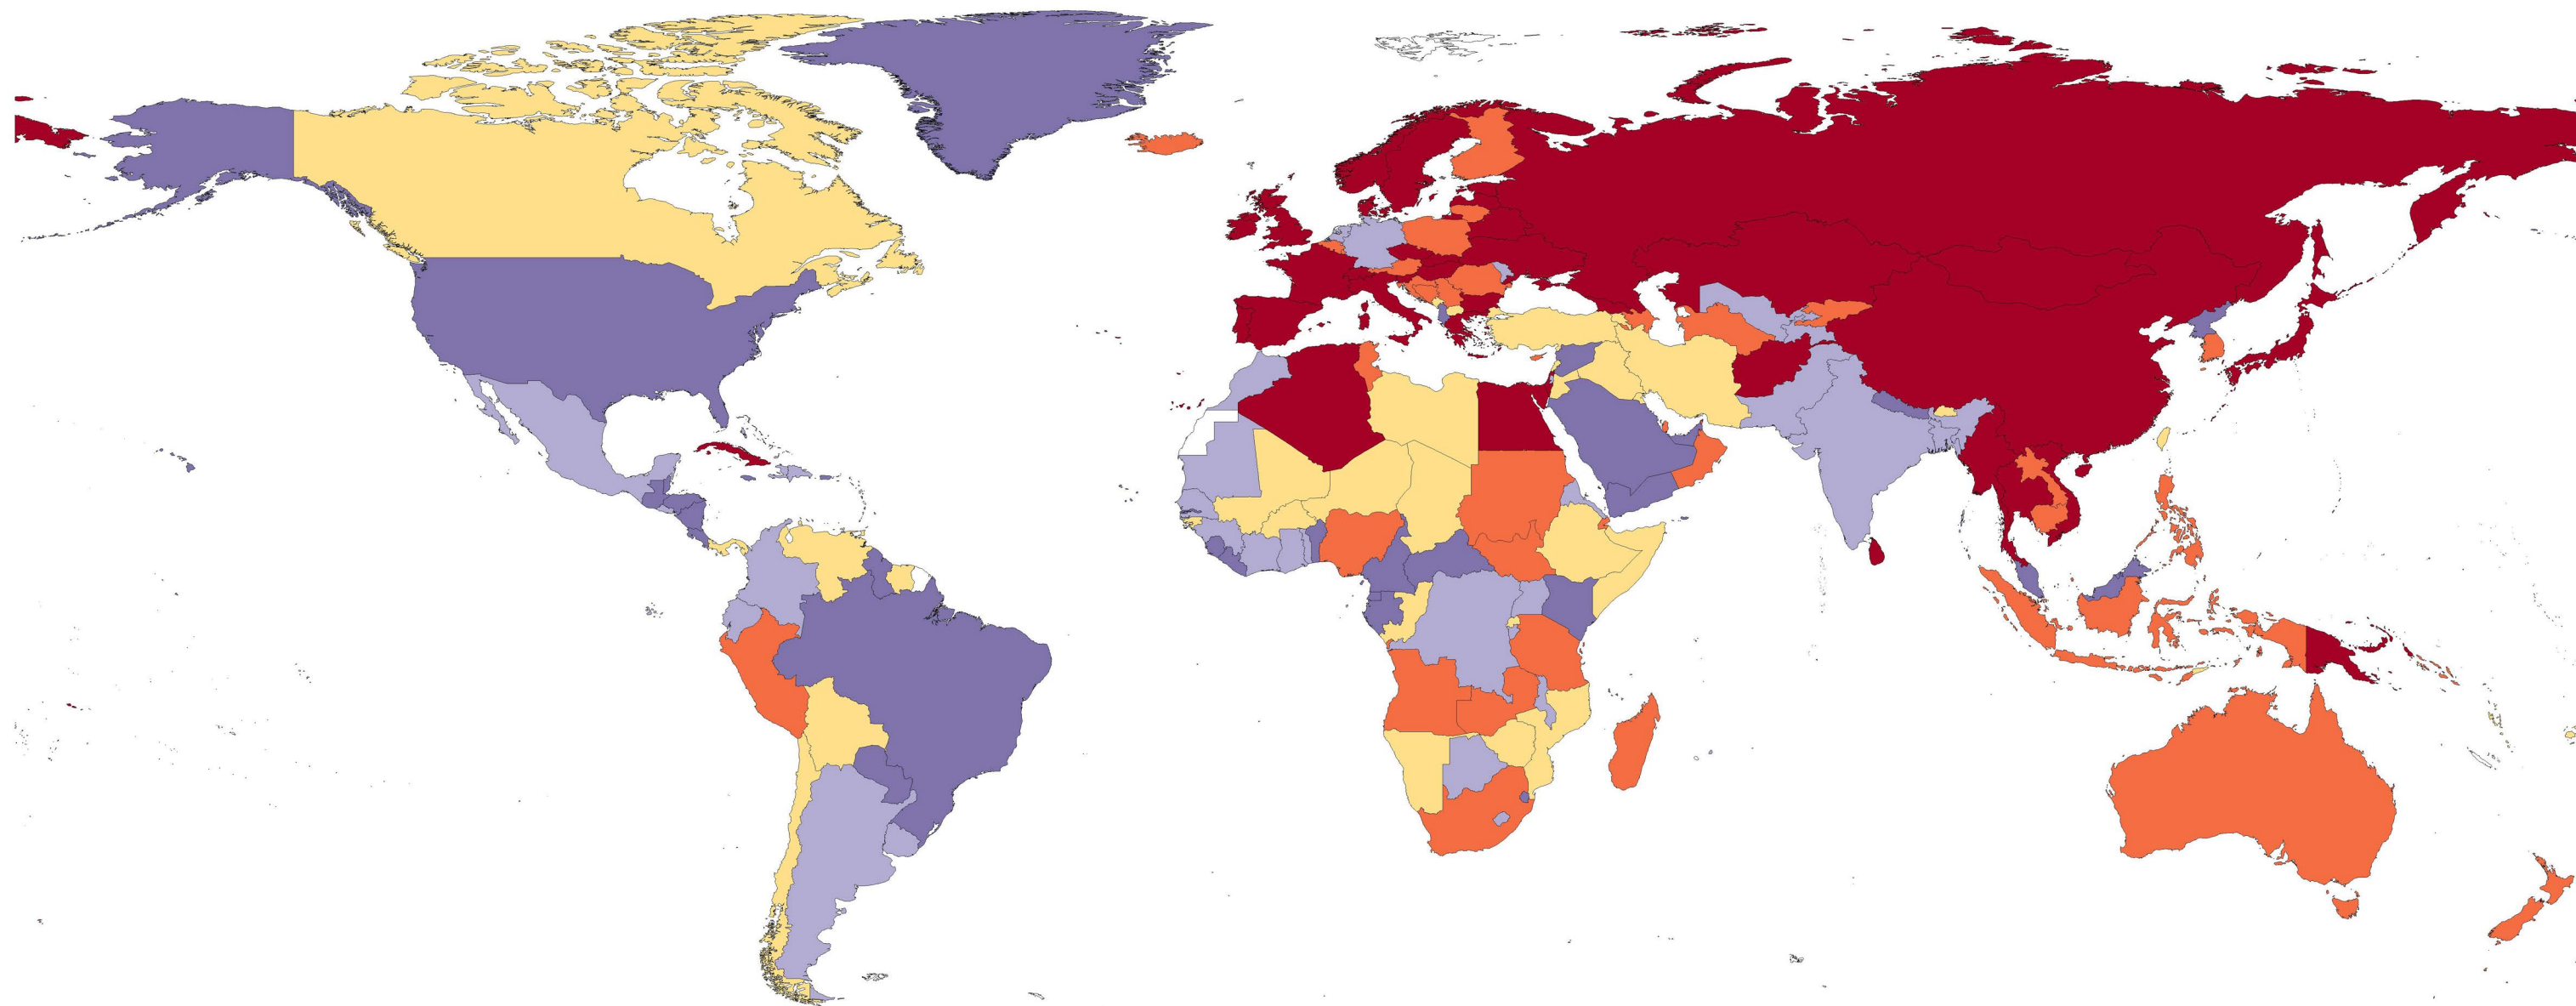

Percent change in DALYs rate due to Mental disorders (%), 1990 to 2017

■ < -2.3    ■ [-2.3 to 0.9)    ■ [0.9 to 4.8)    ■ [4.8 to 9.3)    ■  $\geq 9.3$

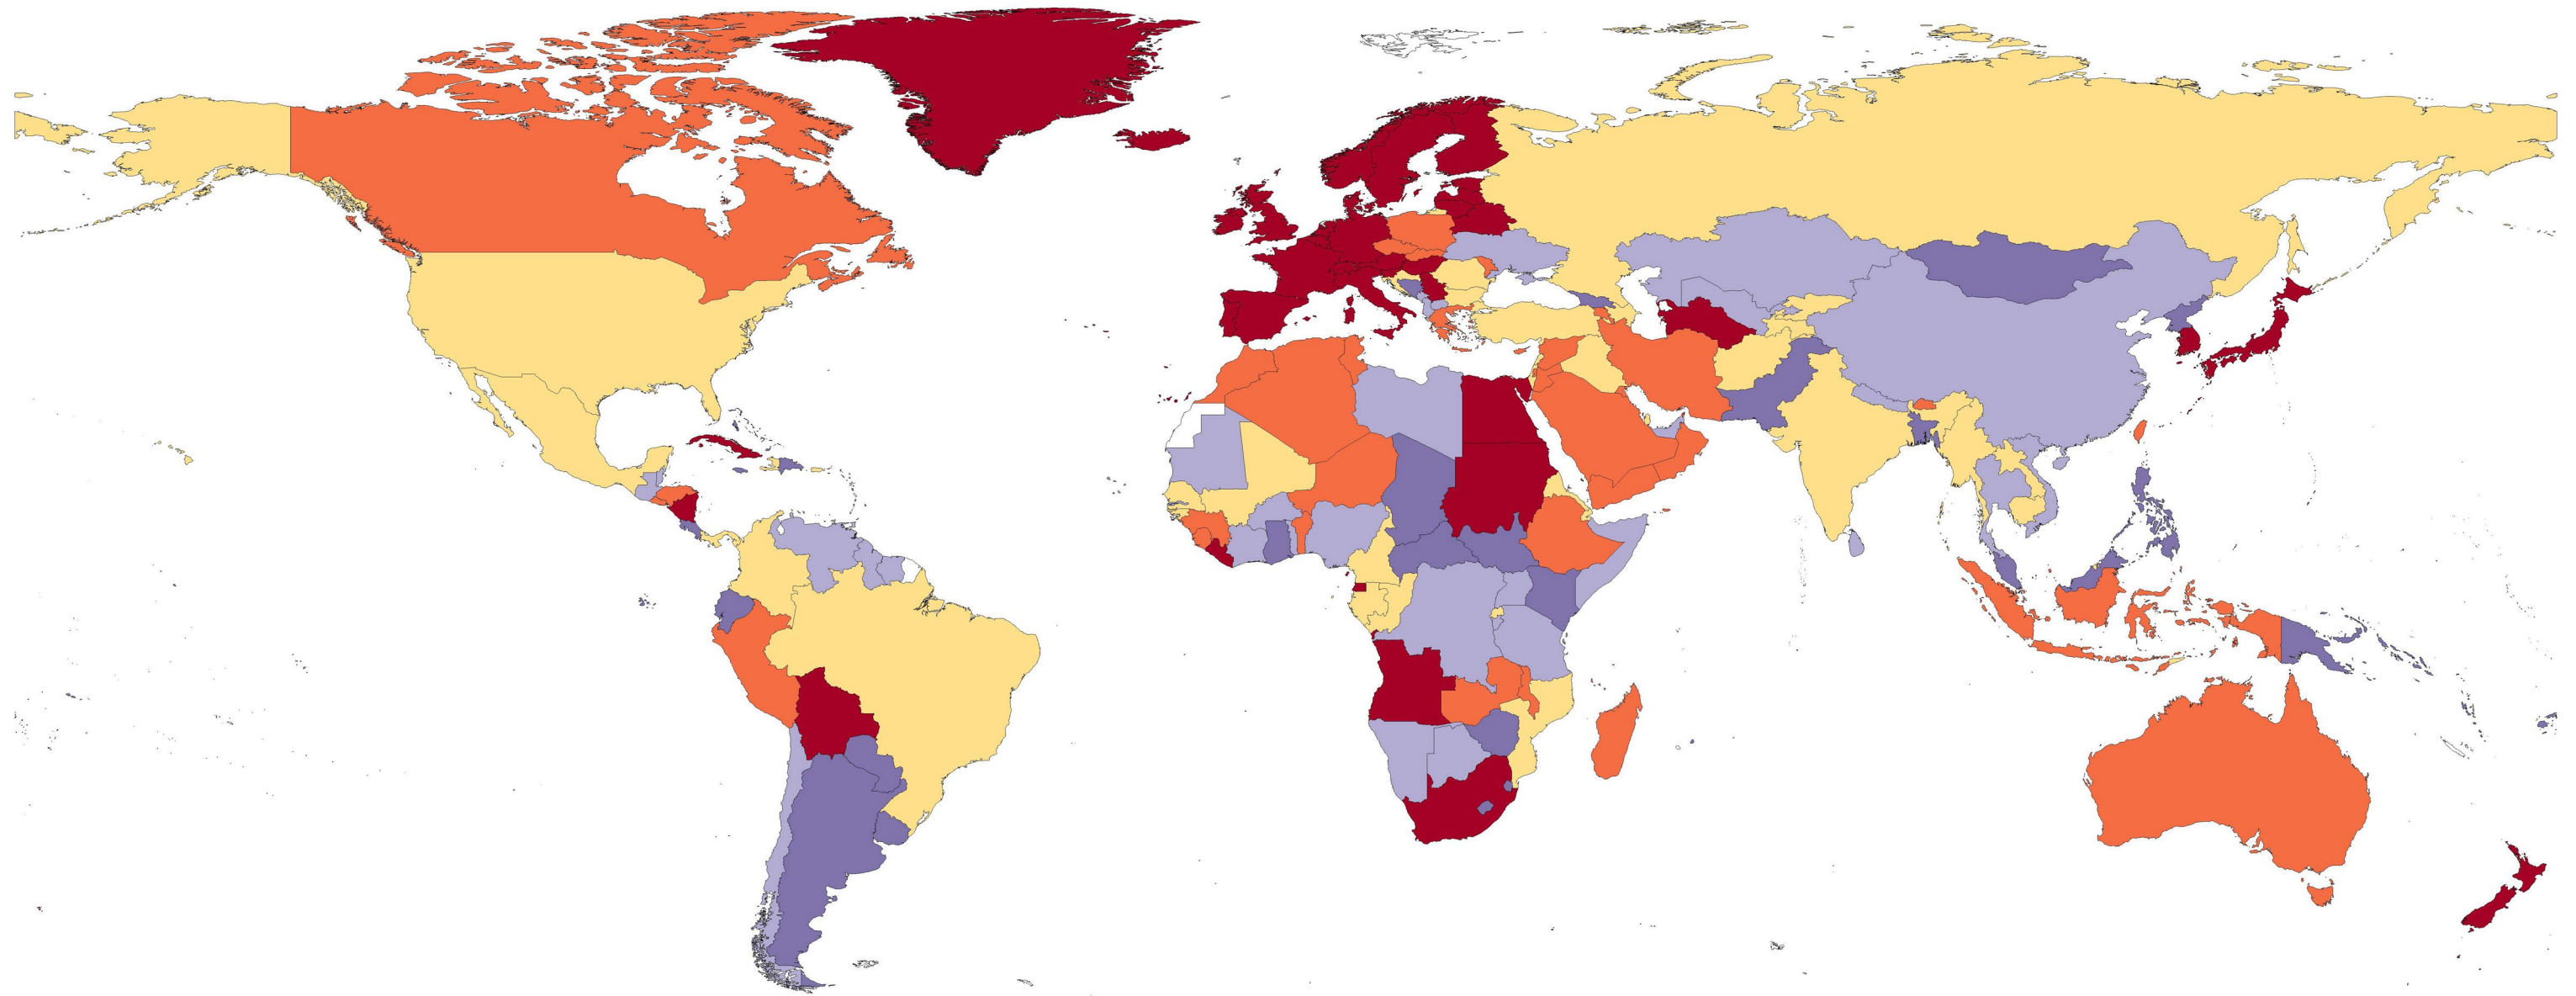

Percent change in DALYs rate due to Road injuries (%), 1990 to 2017

■ < -69.1    ■ [-69.1 to -58.0)    ■ [-58.0 to -47.6)    ■ [-47.6 to -27.1)    ■ ≥ -27.1



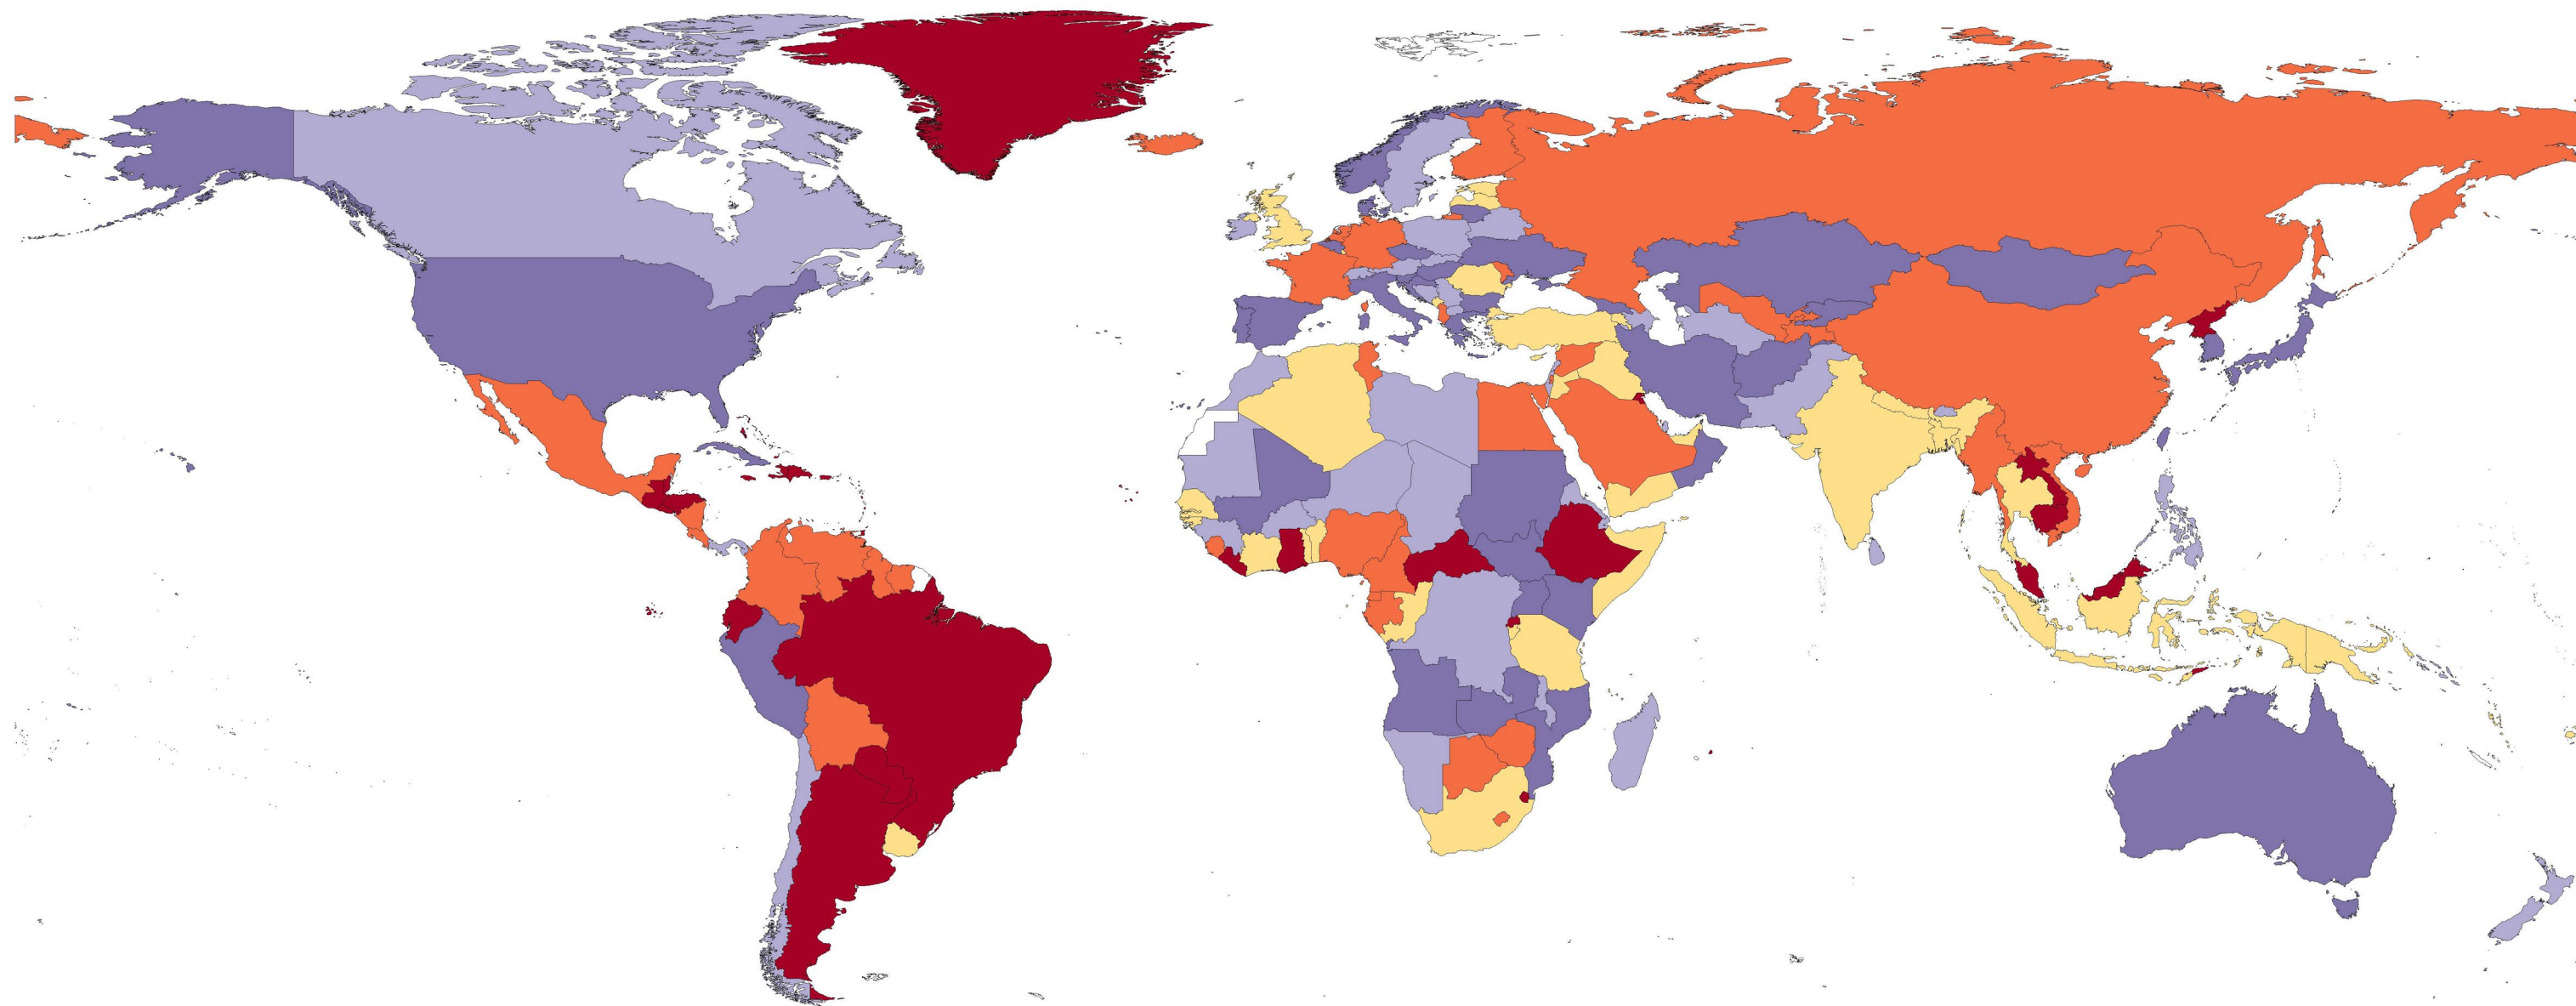

Percent change in DALYs rate due to Dermatitis (%), 1990 to 2017

■ < -1.5    ■ [-1.5 to -0.2)    ■ [-0.2 to 0.4)    ■ [0.4 to 1.5)    ■ ≥ 1.5

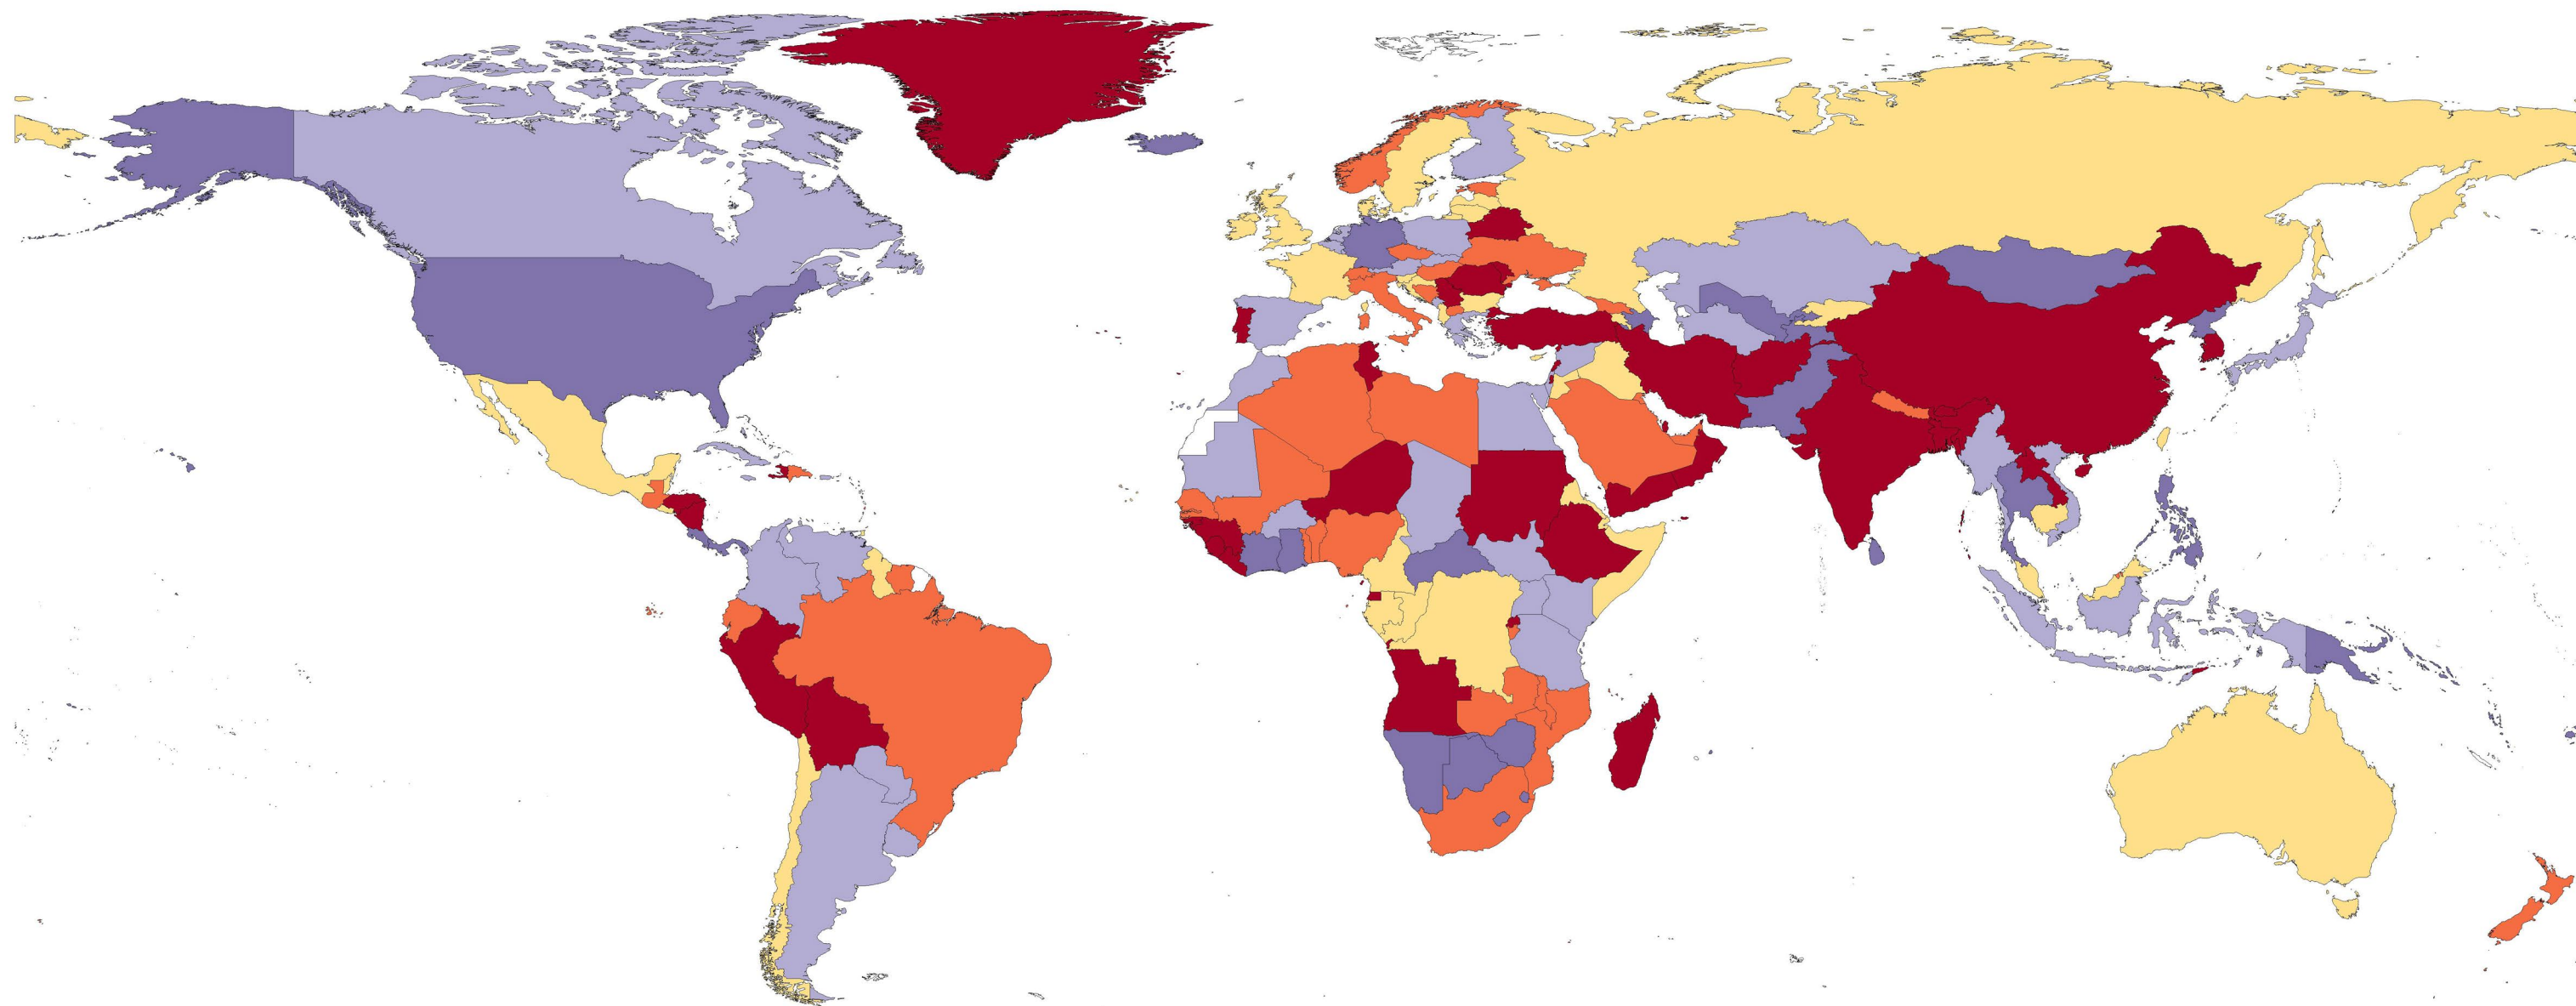

Percent change in DALYs rate due to Idiopathic epilepsy (%), 1990 to 2017

- < -31.0
- [-31.0 to -21.6)
- [-21.6 to -15.2)
- [-15.2 to -4.7)
- ≥ -4.7



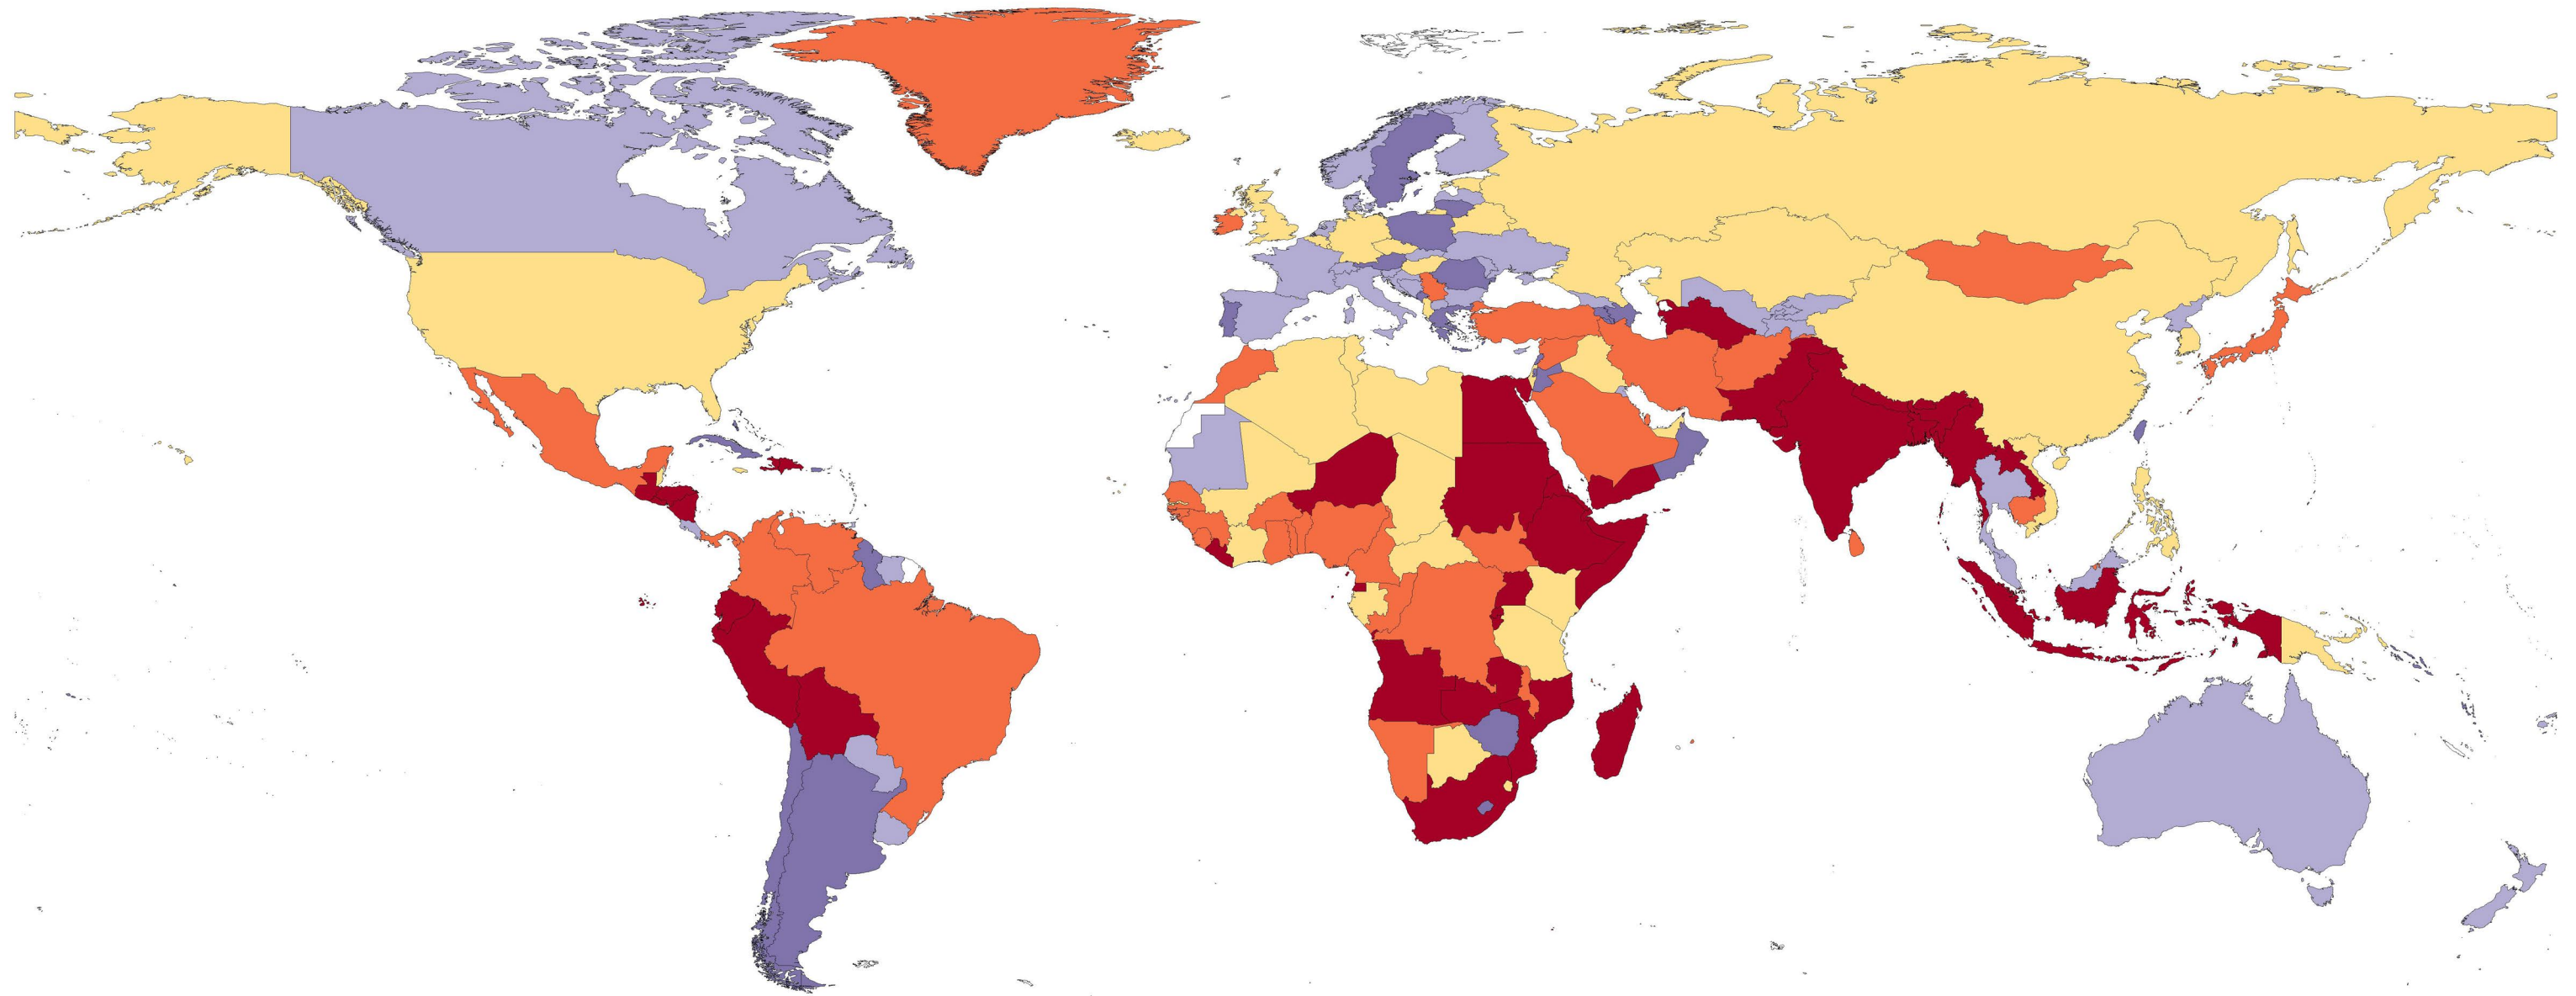

Percent change in DALYs rate due to Asthma (%), 1990 to 2017

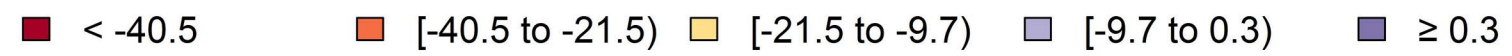

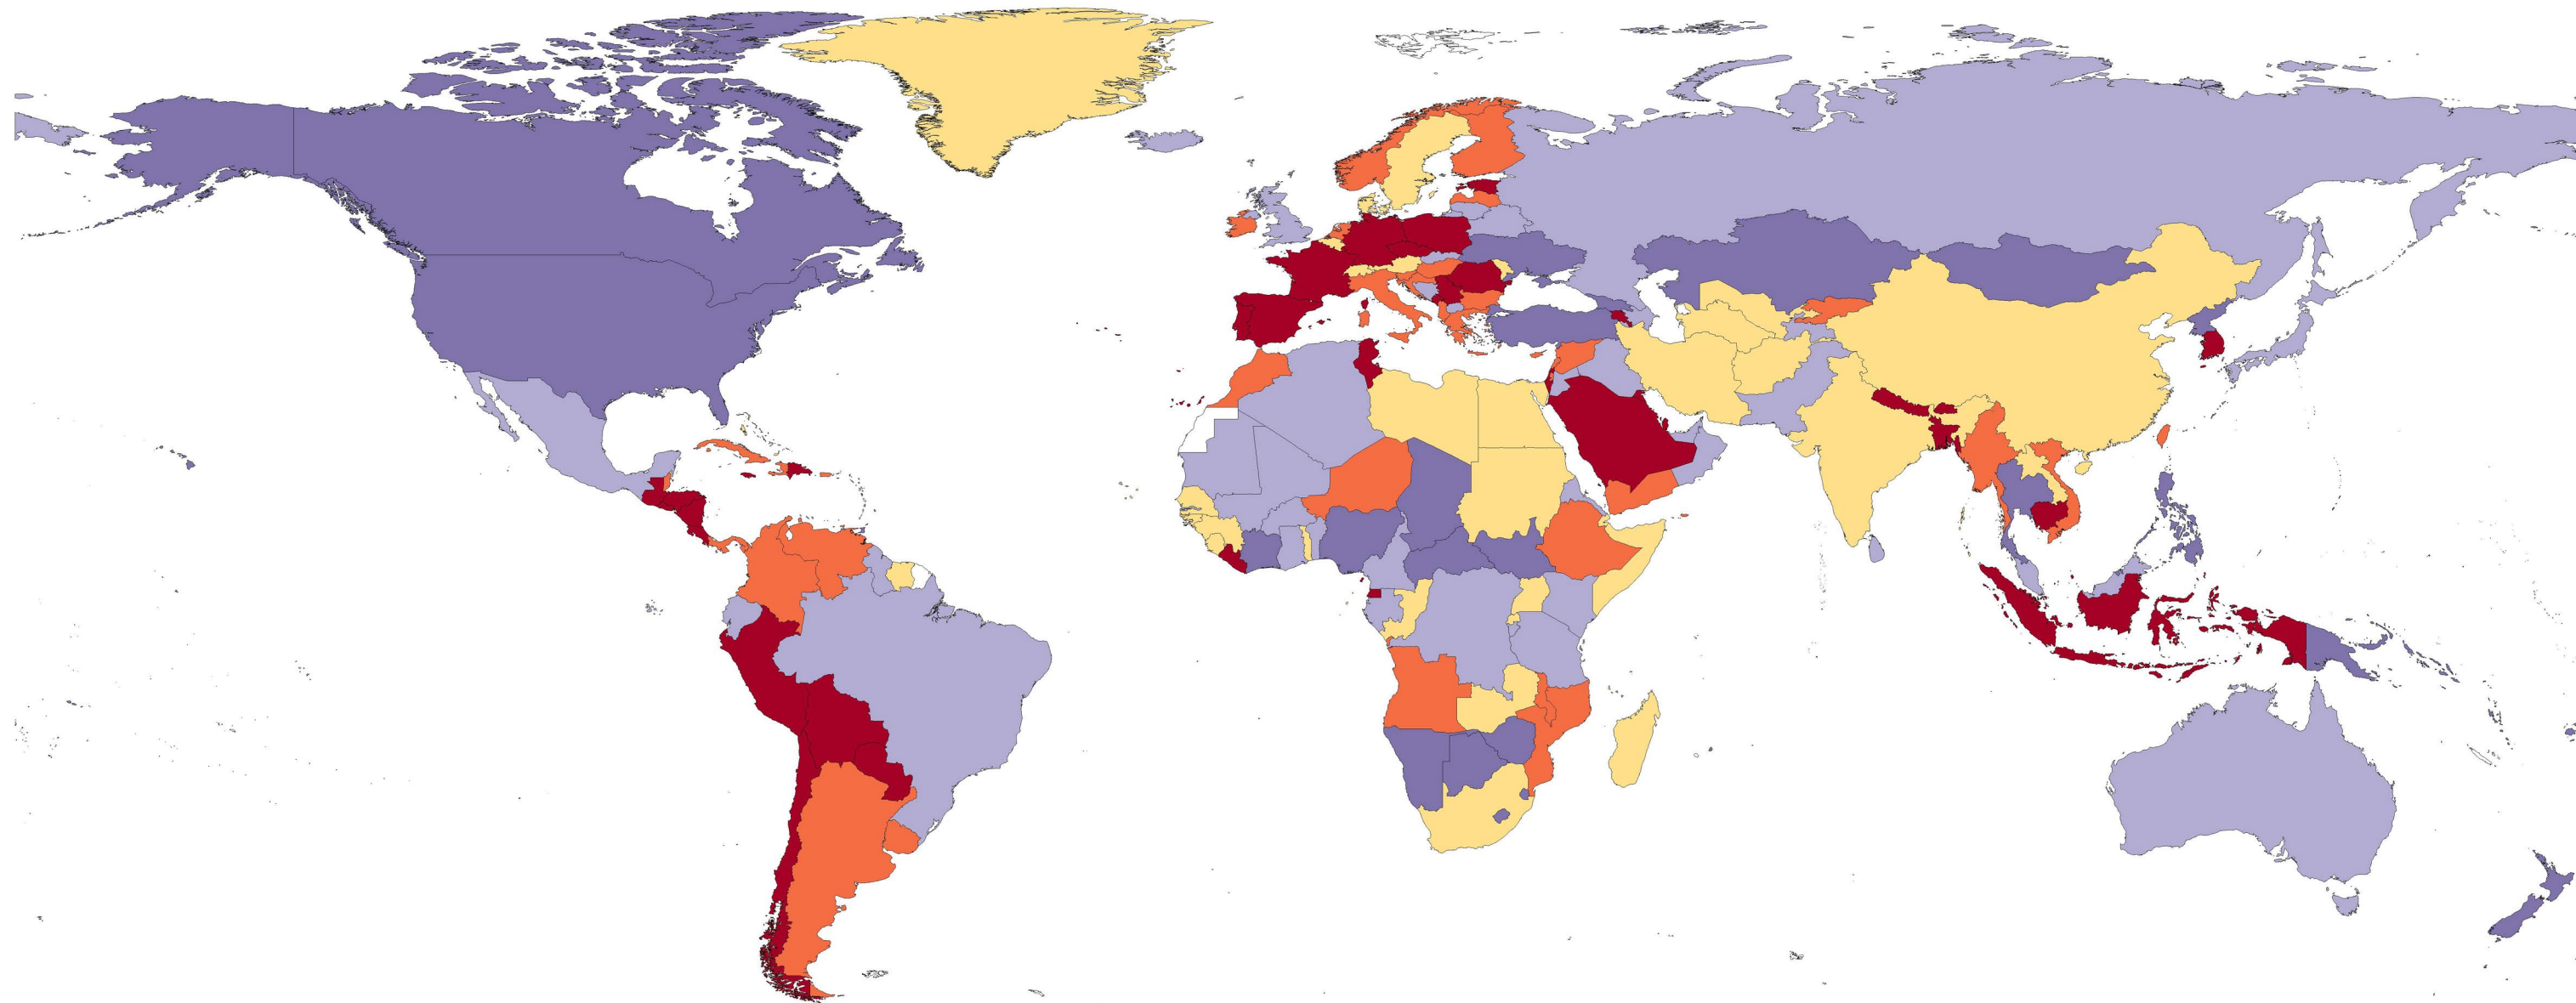

Percent change in DALYs rate due to Foreign body (%), 1990 to 2017

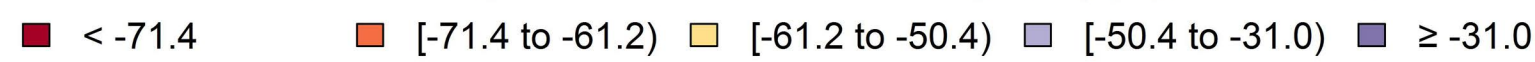



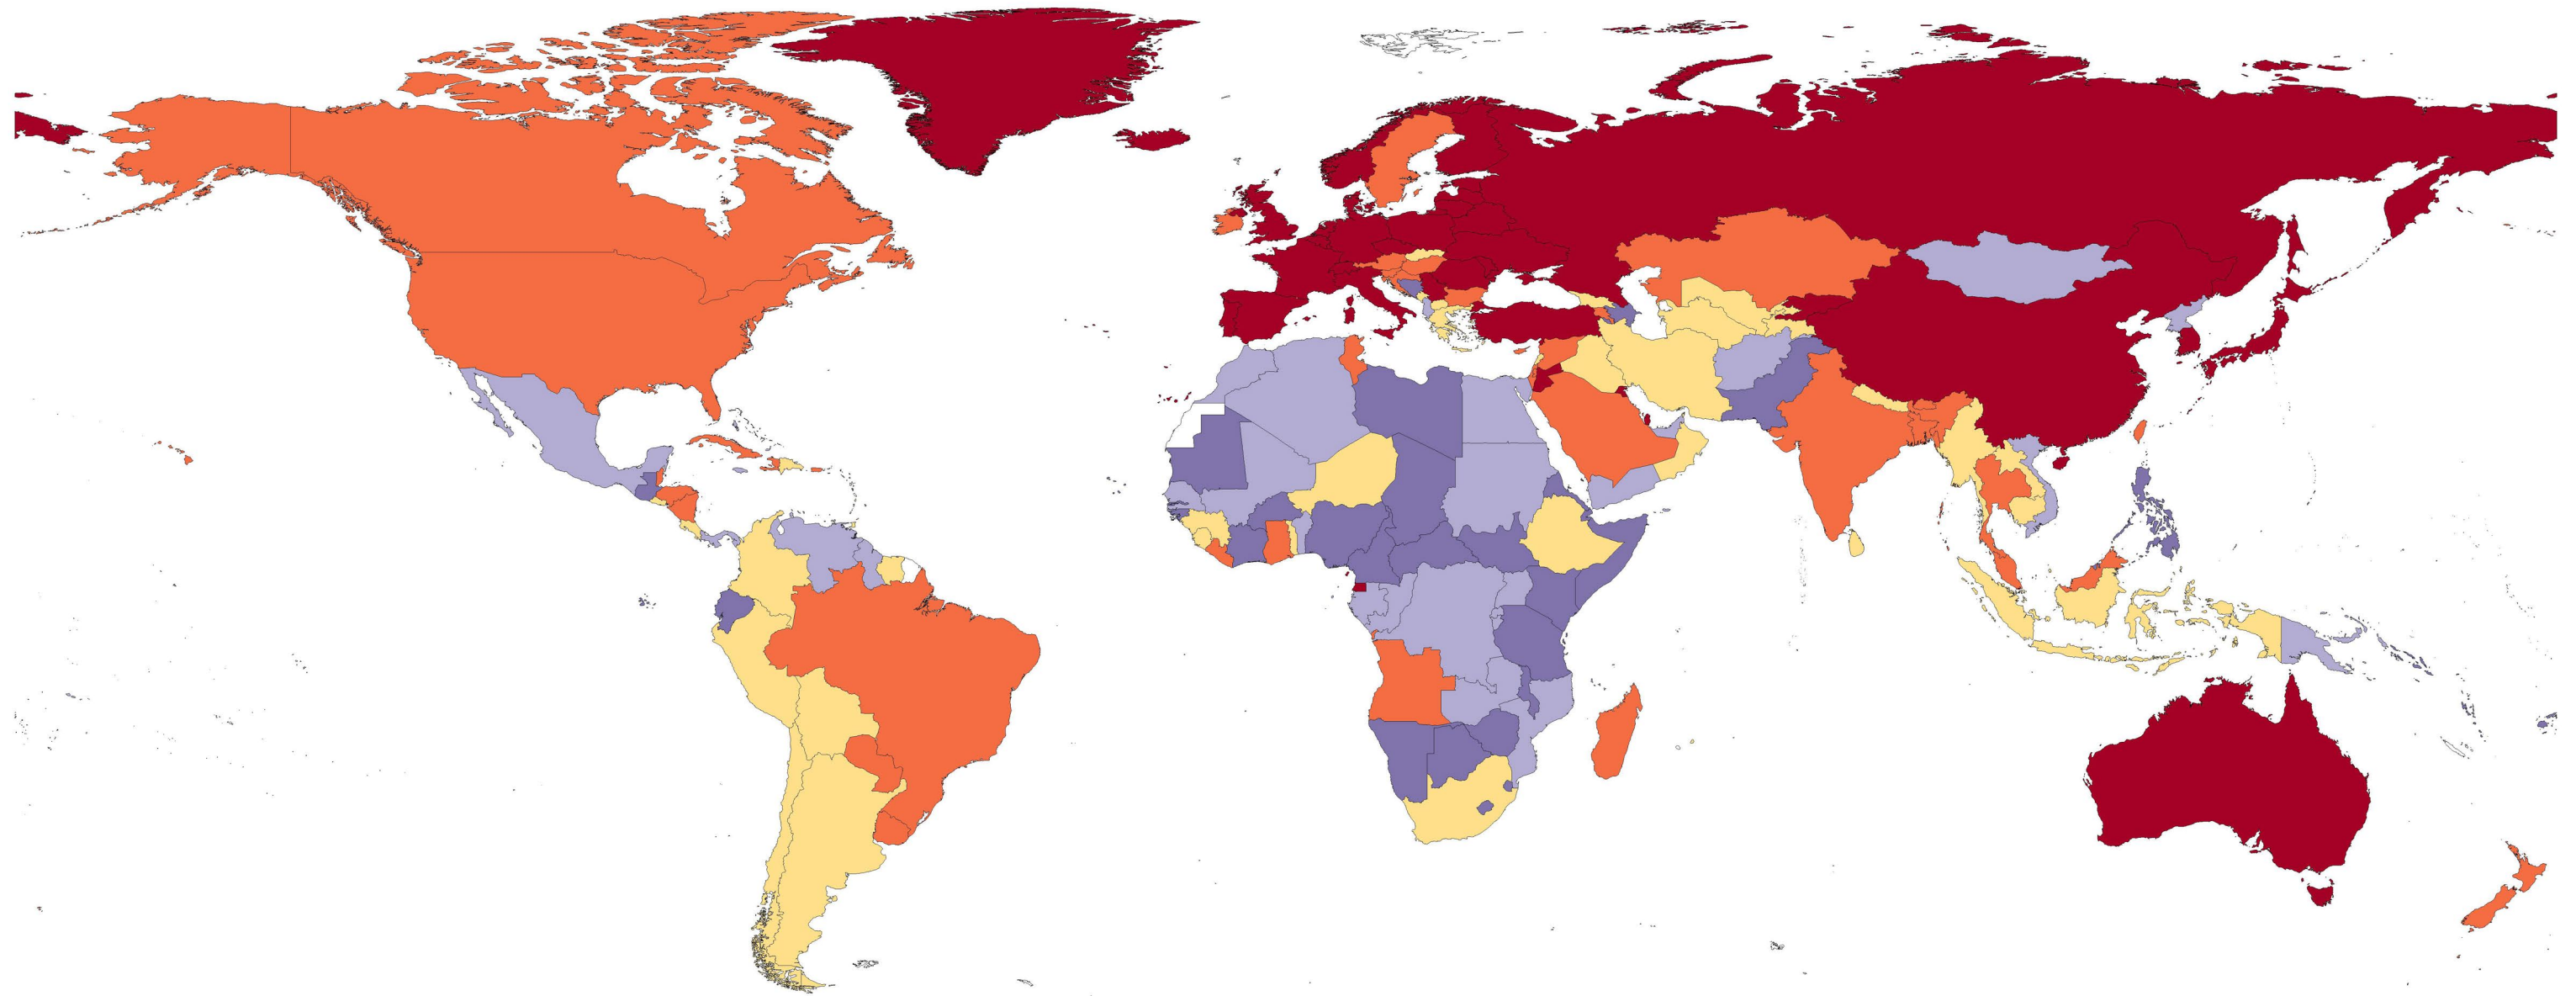

Percent change in DALYs rate due to Leukemia (%), 1990 to 2017

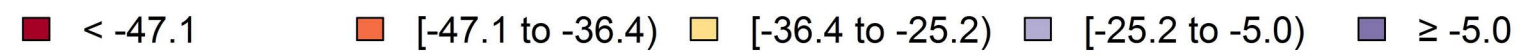

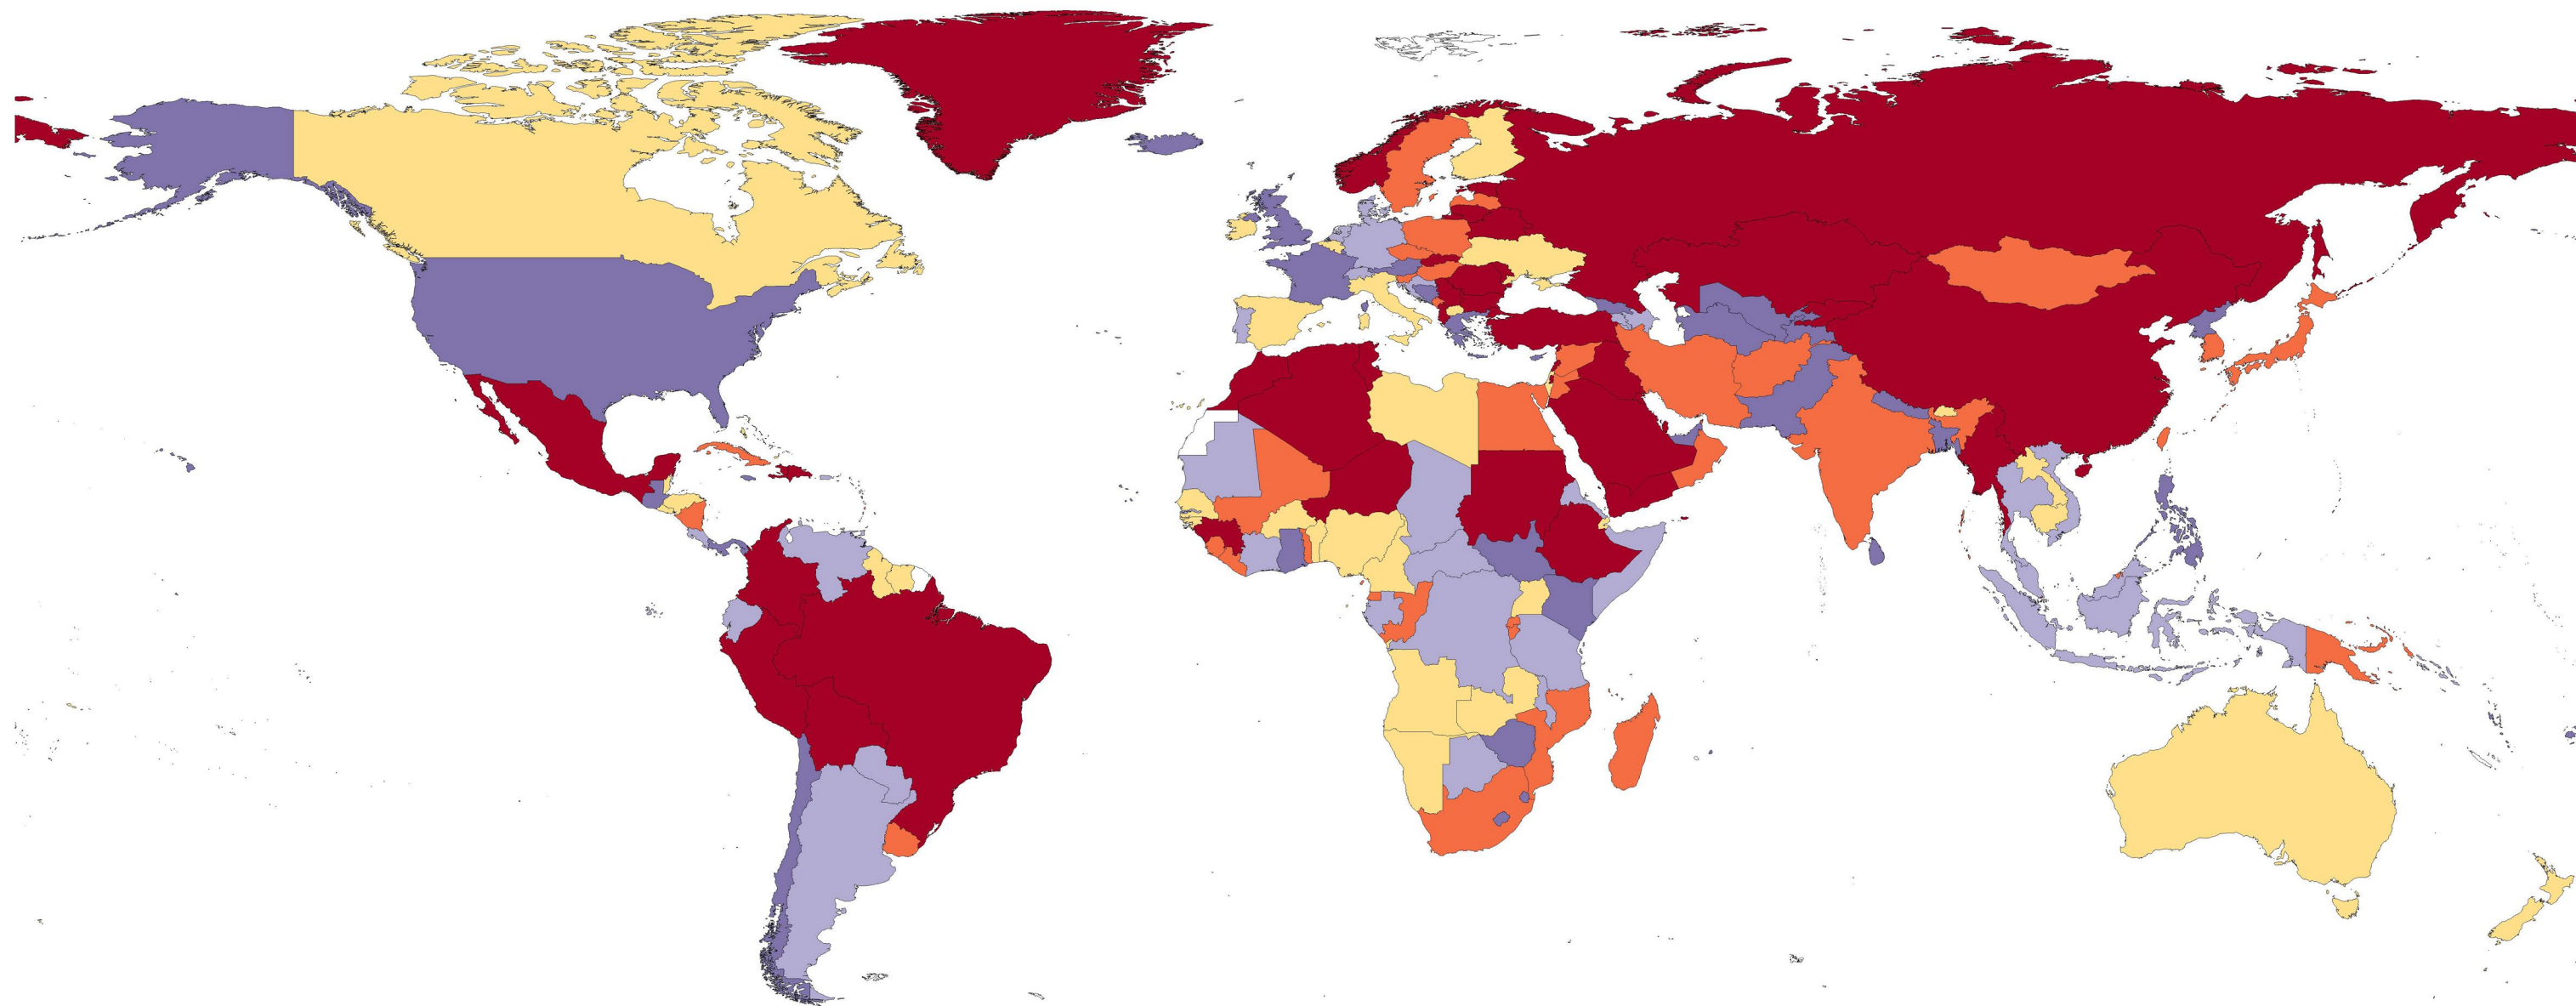

Percent change in DALYs rate due to Diabetes mellitus (%), 1990 to 2017

■ < -25.2    ■ [-25.2 to -13.6)    ■ [-13.6 to -0.3)    ■ [-0.3 to 13.3)    ■ ≥ 13.3
